# Supplementary material for: A ratiometric near-infrared fluorescent probe based on a novel reactive cyanine platform for mitochondrial pH detection
Source: Royal Society of Chemistry journal article supplement (doi:10.1039/d1tb00643f), 2021-01-01
Supplement: d1tb00643f1.pdf [file d1tb00643f1.pdf]

## A Ratiometric Near-Infrared Fluorescent Probe Based on a Novel Reactive Cyanine Platform for Mitochondrial pH Detection

Shulin Wan,<sup>a</sup> Shuai Xia,<sup>a</sup> Jerry Medford,<sup>a</sup> Emma Durocher,<sup>a</sup> Tessa E. Steenwinkel,<sup>b</sup> Lexi Rule,<sup>a</sup> Yibin Zhang,<sup>a</sup> Rudy L. Luck,<sup>a\*</sup> Thomas Werner<sup>b\*</sup> and Haiying Liu <sup>a\*</sup>

<sup>a</sup>Department of Chemistry, and <sup>b</sup>Department of Biological Sciences, Michigan Technological University, Houghton, MI 49931, E-mail: rluck@mtu.edu; twerner@mtu.edu; hylu@mtu.edu

### Supporting Information

#### Contents

|                                                                                                                                             |    |
|---------------------------------------------------------------------------------------------------------------------------------------------|----|
| Synthetic route to near-infrared rhodamine dyes A, B, and C. ....                                                                           | 6  |
| 1.1 Synthesis of 9-chloro-1,2,3,4-tetrahydroacridine (compound 3). ....                                                                     | 6  |
| Synthesis of compound 4 .....                                                                                                               | 6  |
| Figure S1. <sup>1</sup> H NMR spectrum of compound 3. ....                                                                                  | 7  |
| Figure S2. <sup>13</sup> C NMR spectrum of compound 3. ....                                                                                 | 7  |
| Figure S3. <sup>1</sup> H NMR spectrum of probe A in CDCl <sub>3</sub> solution. ....                                                       | 8  |
| Figure S4. <sup>13</sup> C NMR spectrum of probe A in CDCl <sub>3</sub> solution. ....                                                      | 8  |
| Figure S5. High-resolution ESI mass spectrum of probe A. ....                                                                               | 9  |
| Figure S6. <sup>1</sup> H NMR spectrum of probe B in CDCl <sub>3</sub> solution. ....                                                       | 9  |
| Figure S7. <sup>13</sup> C NMR spectrum of probe B in CDCl <sub>3</sub> solution. ....                                                      | 10 |
| Figure S8. High-resolution ESI mass spectrum of probe B. ....                                                                               | 10 |
| Figure S9. <sup>1</sup> H NMR spectrum of probe C in CDCl <sub>3</sub> solution. ....                                                       | 11 |
| Figure S10. <sup>13</sup> C NMR spectrum of probe C in CDCl <sub>3</sub> solution. ....                                                     | 11 |
| Figure S11. High-resolution ESI mass spectrum of probe C. ....                                                                              | 12 |
| Figure S12. <sup>1</sup> H NMR spectrum of probe D in CDCl <sub>3</sub> solution. ....                                                      | 12 |
| Figure S13. <sup>13</sup> C NMR spectrum of probe D in CDCl <sub>3</sub> solution. ....                                                     | 13 |
| Figure S14. High-resolution ESI mass spectrum of probe D. ....                                                                              | 13 |
| Calculation of fluorescence quantum yields of the probes. ....                                                                              | 14 |
| Table S1. Absorption and emission peaks, Stokes shift, molar absorptivity and fluorescence quantum yields of the probes A, B, C and D. .... | 14 |
| Determination of the probe pK <sub>a</sub> values by fluorometric titration .....                                                           | 15 |
| Figure S15. Absorption and fluorescence spectra of 5 μM probe A in different pH buffer solutions. ...                                       | 15 |
| Figure S16. Absorbance (A) and fluorescence (B) responses of 5 μM probe B to pH changes in buffer solutions. ....                           | 16 |
| Figure S17. Fluorescence responses of 5 μM probe B to pH changes in buffer solutions. ....                                                  | 16 |

|                                                                                                                                                                                                                                                                                                                                                                                                                                                                                                                                                                                                                                                                                                                                                |    |
|------------------------------------------------------------------------------------------------------------------------------------------------------------------------------------------------------------------------------------------------------------------------------------------------------------------------------------------------------------------------------------------------------------------------------------------------------------------------------------------------------------------------------------------------------------------------------------------------------------------------------------------------------------------------------------------------------------------------------------------------|----|
| Figure S18. Absorbance (A) and fluorescence (B) responses of 5 $\mu$ M probe C to pH changes in buffer solutions. ....                                                                                                                                                                                                                                                                                                                                                                                                                                                                                                                                                                                                                         | 17 |
| Figure S19. Fluorescence responses of 5 $\mu$ M probe C to pH changes in buffer solutions. ....                                                                                                                                                                                                                                                                                                                                                                                                                                                                                                                                                                                                                                                | 17 |
| Figure S20. Absorption and emission spectra of 7-(diethylamino)coumarin-3-carboxylic acid and probe B in pH 7.0 buffer solution containing 1% dimethyl sulfoxide. ....                                                                                                                                                                                                                                                                                                                                                                                                                                                                                                                                                                         | 18 |
| Figure S21. Fluorescence responses of 5 $\mu$ M probe D to pH changes in buffer solutions.....                                                                                                                                                                                                                                                                                                                                                                                                                                                                                                                                                                                                                                                 | 18 |
| The reversible fluorescence responses of the probes to pH changes .....                                                                                                                                                                                                                                                                                                                                                                                                                                                                                                                                                                                                                                                                        | 19 |
| Figure S22. Fluorescence responses of 5 $\mu$ M probes B, C, and D to pH changes from 7.00 to 2.20 under 540 nm excitation. ....                                                                                                                                                                                                                                                                                                                                                                                                                                                                                                                                                                                                               | 19 |
| Figure S23. HR-ESI-MS spectrum of probe B after treatment with TFA. ....                                                                                                                                                                                                                                                                                                                                                                                                                                                                                                                                                                                                                                                                       | 19 |
| Figure S24. HR-ESI-MS spectrum of probe C after treatment with TFA. ....                                                                                                                                                                                                                                                                                                                                                                                                                                                                                                                                                                                                                                                                       | 20 |
| Figure S25. HR-ESI-MS spectrum of probe D after treatment with TFA. ....                                                                                                                                                                                                                                                                                                                                                                                                                                                                                                                                                                                                                                                                       | 20 |
| Figure S26. $^1$ H NMR spectrum of probe C before (gray line) and after (red line) treatment with TFA...21                                                                                                                                                                                                                                                                                                                                                                                                                                                                                                                                                                                                                                     |    |
| Figure S27. Fluorescent response of 5 $\mu$ M probes A, B, C, and D to different anion and cations in PBS=7.0 buffer. ....                                                                                                                                                                                                                                                                                                                                                                                                                                                                                                                                                                                                                     | 22 |
| Photostability of the probes .....                                                                                                                                                                                                                                                                                                                                                                                                                                                                                                                                                                                                                                                                                                             | 23 |
| Figure S28. Fluorescence intensity of 5 $\mu$ M probes A, B, C, and D under continuous 520 nm excitation. ....                                                                                                                                                                                                                                                                                                                                                                                                                                                                                                                                                                                                                                 | 23 |
| Figure S29. Fluorescence images of HeLa cells incubated with 5 $\mu$ M probe A and 5 $\mu$ M Mitoview blue for 15 minutes under excitation of 559 nm and 405 nm for probe A and Mitoview blue, respectively. Scale bar: 20 $\mu$ m. The cells were washed with cell culture medium twice after 15-minute incubation of HeLa cells with probe A and Mitoview blue before cellular imaging was conducted, using confocal fluorescence microscope. ....                                                                                                                                                                                                                                                                                           | 24 |
| Figure S30. Fluorescence images of 5 $\mu$ M probe B and Mitoview blue in HeLa cells under excitation of 559 nm and 405 nm for probe B and Mitoview blue, respectively. Scale bar: 20 $\mu$ m. The cells were washed with cell culture medium twice after a 15-minute incubation of HeLa cells with probe B and Mitoview blue before cellular imaging was conducted, using confocal fluorescence microscope. ....                                                                                                                                                                                                                                                                                                                              | 24 |
| Figure S31. Fluorescence images of 5 $\mu$ M probe C and Mitoview blue in HeLa cells under excitation of 559 nm and 405 nm for probe C and Mitoview blue, respectively. Scale bar: 20 $\mu$ m. The cells were washed with cell culture medium twice after a 15-minute incubation of HeLa cells with probe C and Mitoview blue before cellular imaging was conducted,using confocal fluorescence microscope. ....                                                                                                                                                                                                                                                                                                                               | 25 |
| Figure S32. Fluorescence images of HeLa cells incubated with 5 $\mu$ M probe D under different cellular pH conditions with scale bars of 50 $\mu$ m. HeLa cells were incubated with 5 $\mu$ M probe D for 15 minutes, washed with cell culture medium twice, and then incubated in different pH buffers in the presence of 5 $\mu$ g/mL nigericin, a K <sup>+</sup> /H <sup>+</sup> ionophore for 20 minutes. Channel 1: the coumarin donor fluorescence collected from 475 to 525 nm at 405 nm excitation. Channel 2: the cyanine acceptor fluorescence collected from 600 to 700 nm at 405 nm excitation. Channel 3 bright-field. Channel 4: merged images of channels 1, 2, and 3. Channel 5: merged images of channels 1 and 3. Channel 6: |    |

|                                                                                                                                                      |    |
|------------------------------------------------------------------------------------------------------------------------------------------------------|----|
| merged images of channels 2 and 3. Channel 7: ratiometric images of channel 1 divided by channel 2, which were acquired with Image-Pro software..... | 25 |
| Theoretical Calculations .....                                                                                                                       | 26 |
| Methods. ....                                                                                                                                        | 26 |
| Results of the theoretical calculations.....                                                                                                         | 26 |
| Theoretical calculations for probe A.....                                                                                                            | 26 |
| Figure S33. GaussView representation of probe A.....                                                                                                 | 26 |
| Table S2. Calculated atomic coordinates for probe A in water. ....                                                                                   | 27 |
| Figure S34. Calculated UV-Vis spectrum for probe A in water. ....                                                                                    | 28 |
| Table S3. Excitation energies and oscillator strengths listing for Probe A in water.....                                                             | 28 |
| Figure S35. Drawings of selected molecular orbitals listed in Table S2.....                                                                          | 29 |
| Theoretical calculations for probe B.....                                                                                                            | 30 |
| Figure S36. GaussView representation of probe B. ....                                                                                                | 30 |
| Table S4. Calculated atomic coordinates for probe B in water. ....                                                                                   | 31 |
| Figure S37. Calculated UV-Vis spectrum for probe B in water. ....                                                                                    | 32 |
| Table S5. Excitation energies and oscillator strengths listing for probe B in water.....                                                             | 32 |
| Figure S38. Drawings of selected molecular orbitals for probe B listed in Table S4.....                                                              | 33 |
| Theoretical calculations for probe BH <sup>+</sup> .....                                                                                             | 34 |
| Figure S39. GaussView representation of probe BH <sup>+</sup> . ....                                                                                 | 34 |
| Table S6. Calculated atomic coordinates for probe BH <sup>+</sup> in water.....                                                                      | 35 |
| Figure S40. Calculated UV-Vis spectrum for probe BH <sup>+</sup> in water.....                                                                       | 36 |
| Table S7. Excitation energies and oscillator strengths listing for probe BH <sup>+</sup> in water. ....                                              | 36 |
| Figure S41. Drawings of selected molecular orbitals for probe BH <sup>+</sup> listed in Table S6.....                                                | 37 |
| Theoretical calculations for probe C.....                                                                                                            | 38 |
| Figure S42. GaussView representation of probe C. ....                                                                                                | 38 |
| Table S8. Calculated atomic coordinates for probe C in water. ....                                                                                   | 39 |
| Figure S43. Calculated UV-Vis spectrum for probe C in water. ....                                                                                    | 40 |
| Table S9. Excitation energies and oscillator strengths listing for probe C in water.....                                                             | 40 |
| Figure S44. Drawings of selected molecular orbitals for probe C listed in Table S8.....                                                              | 41 |
| Theoretical calculations for probe CH <sup>+</sup> .....                                                                                             | 42 |
| Figure S45. GaussView representation of probe CH <sup>+</sup> . ....                                                                                 | 42 |
| Table S10. Calculated atomic coordinates for probe CH <sup>+</sup> in water.....                                                                     | 43 |
| Figure S46. Calculated UV-Vis spectrum for probe CH <sup>+</sup> in water.....                                                                       | 44 |

|                                                                                                                           |    |
|---------------------------------------------------------------------------------------------------------------------------|----|
| Table S11. Excitation energies and oscillator strengths listing for probe CH <sup>+</sup> in water. ....                  | 44 |
| Figure S47. Drawings of selected molecular orbitals for probe CH <sup>+</sup> listed in Table S10. ....                   | 45 |
| Theoretical calculations for probe D. ....                                                                                | 46 |
| Figure S48. GaussView representation of probe D. ....                                                                     | 46 |
| Table S12. Calculated atomic coordinates for probe D in water. ....                                                       | 47 |
| Figure S49. Calculated UV-Vis spectrum for probe D in water. ....                                                         | 49 |
| Table S13. Excitation energies and oscillator strengths listing for probe D in water. ....                                | 49 |
| Figure S50. Drawings of selected molecular orbitals for probe D listed in Table S12. ....                                 | 50 |
| Theoretical calculations for probe DH <sup>+</sup> . ....                                                                 | 51 |
| Figure S51. GaussView representation of probe DH <sup>+</sup> . ....                                                      | 51 |
| Table S14. Calculated atomic coordinates for probe DH <sup>+</sup> in water. ....                                         | 52 |
| Figure S52. Calculated UV-Vis spectrum for probe DH <sup>+</sup> in water. ....                                           | 53 |
| Table S15. Excitation energies and oscillator strengths listing for probe DH <sup>+</sup> in water. ....                  | 54 |
| Figure S53. Drawings of selected molecular orbitals for probe DH <sup>+</sup> listed in Table S14. ....                   | 56 |
| Results for the pKa Calculations. ....                                                                                    | 56 |
| Table S16. Calculated atomic coordinates for probe B. ....                                                                | 56 |
| Table S17. Calculated atomic coordinates for probe BH <sup>+</sup> . ....                                                 | 58 |
| Table S18. Calculated atomic coordinates for probe C. ....                                                                | 59 |
| Table S19. Calculated atomic coordinates for probe CH <sup>+</sup> . ....                                                 | 60 |
| Table S20. Calculated atomic coordinates for probe D. ....                                                                | 61 |
| Table S21. Calculated atomic coordinates for probe DH <sup>+</sup> . ....                                                 | 62 |
| Table S22. Calculated atomic coordinates for probe B with one added water molecule. ....                                  | 63 |
| Table S23. Calculated atomic coordinates for probe BH <sup>+</sup> with one added water molecule. ....                    | 65 |
| Table S24. Calculated atomic coordinates for probe C with one added water molecule near center N atom. ....               | 66 |
| Table S25. Calculated atomic coordinates for probe CH <sup>+</sup> with one added water molecule near center N atom. .... | 67 |
| Table S26. Calculated atomic coordinates for probe C with one added water molecule near outer N atom. ....                | 68 |
| Table S27. Calculated atomic coordinates for probe CH <sup>+</sup> with one added water molecule near outer N atom. ....  | 69 |
| Table S28. Calculated atomic coordinates for probe D with one added water molecule. ....                                  | 70 |
| Table S29. Calculated atomic coordinates for probe DH <sup>+</sup> with one added water molecule. ....                    | 71 |

Figure S54. Drawings of the probes showing the orientation of the added water molecule. B, C (water in middle), C (water at the end) and D from top to bottom on the left side and on the right are the corresponding protonated probes. ....73

References .....74

## Synthetic route to near-infrared rhodamine dyes A, B, and C.

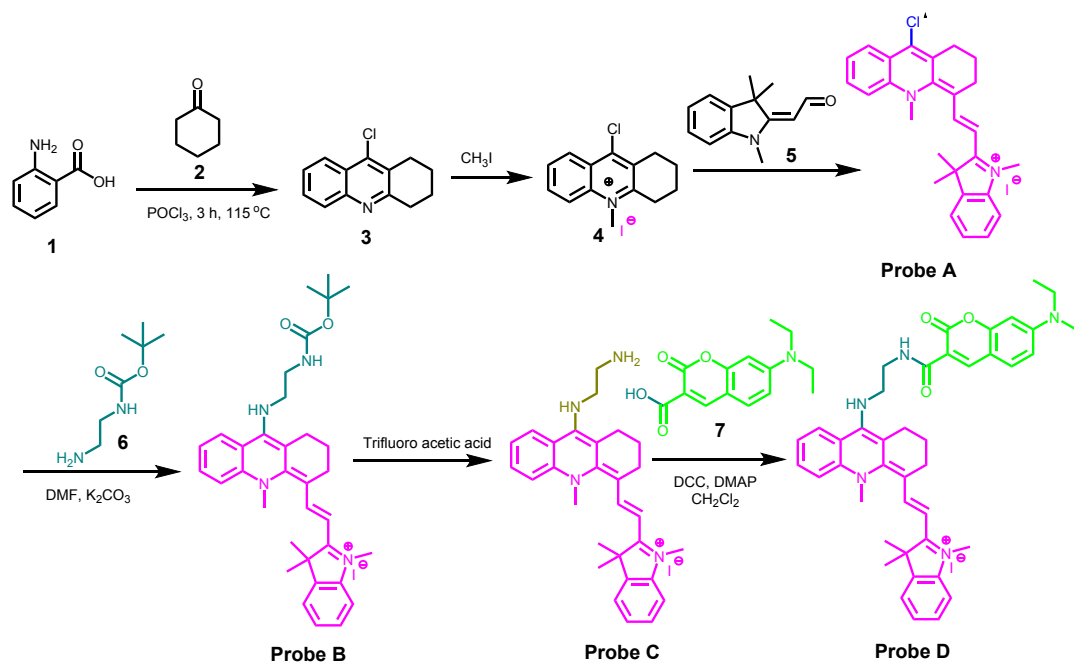

### 1.1 Synthesis of 9-chloro-1,2,3,4-tetrahydroacridine (compound 3).

2-aminobenzoic acid (580 mg, 2.7 mmol) was added to a solution of  $\text{POCl}_3$  (6 mL) containing cyclohexanone (500 mg, 2.46 mmol). The suspension was stirred at  $105^\circ\text{C}$  overnight under an argon atmosphere, allowed to cool down to room temperature, and poured into 200 mL ice-cold water. The pH was adjusted to 7.0 by adding saturated  $\text{NaHCO}_3$ . When the mixture was extracted with dichloromethane (2x100 mL), the organic layer was washed with a saturated  $\text{NaCl}$  solution. After the organic layer was collected, the solvent was evaporated under reduced pressure. The resulting yellow solid was further purified by column chromatography (packed with silica gel, particle size, 0.063-0.2 mm Merck) and eluted with a mixture of ethyl acetate and dichloromethane at a ratio of 1 to 1 to yield compound **3** as a slightly yellow solid. Yield (470 mg, 70%).  $^1\text{H}$  NMR (400 MHz,  $\text{CDCl}_3$ )  $\delta$  8.10 (d,  $J = 7.0$  Hz, 1H), 7.93 (d,  $J = 8.5$  Hz, 1H), 7.64 – 7.57 (m, 1H), 7.47 (t,  $J = 7.0$  Hz, 1H), 3.10 – 3.05 (t, 2H), 2.98 – 2.92 (t, 2H), 1.93 – 1.86 (t, 4H).  $^{13}\text{C}$  NMR (101 MHz,  $\text{CDCl}_3$ )  $\delta$  159.56, 146.77, 141.55, 129.37, 128.97, 128.76, 126.59, 125.51, 123.81, 34.46, 27.78, 22.96.

### Synthesis of compound 4

$\text{CH}_3\text{I}$  (3.9 g, 27.5 mmol) was slowly added to sulfone containing compound **3** (1 g, 4.6 mmol) dissolved into 6 mL of sulfolane. The mixture was stirred at  $50^\circ\text{C}$  for 10 h, generating a yellow precipitate. The precipitate was collected by filtration under vacuum and washed with diethyl ether (2 x 50 mL) to obtain the pure compound **4** as a yellow solid. The obtained compound **4** was used for the next step without further purification.

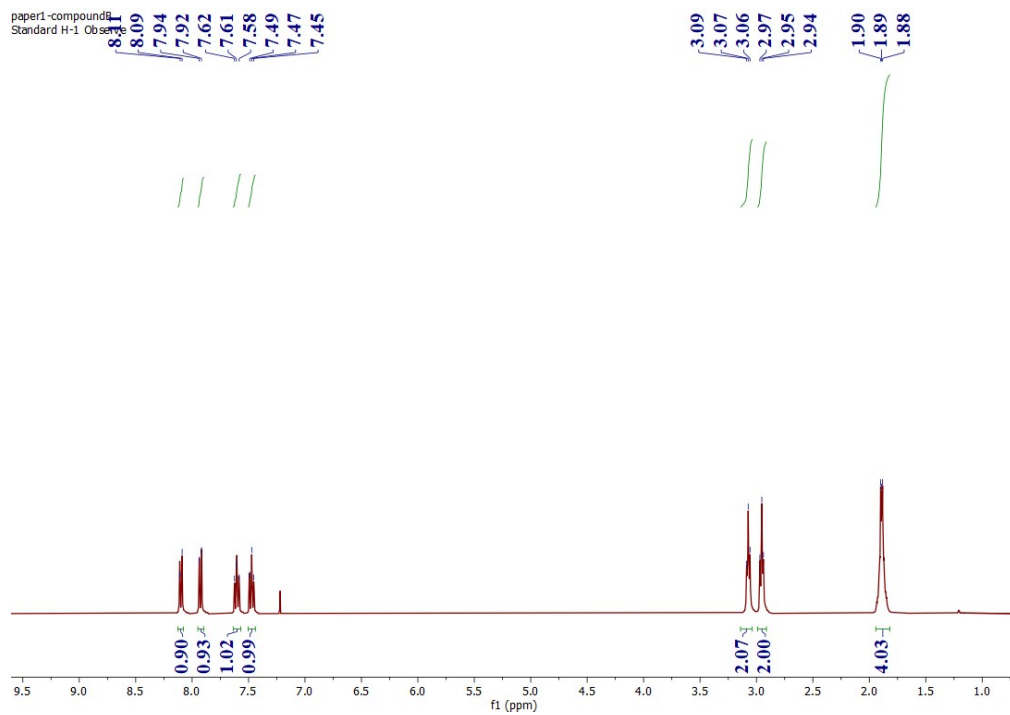

**Figure S1.**  $^1\text{H}$  NMR spectrum of compound **3**.

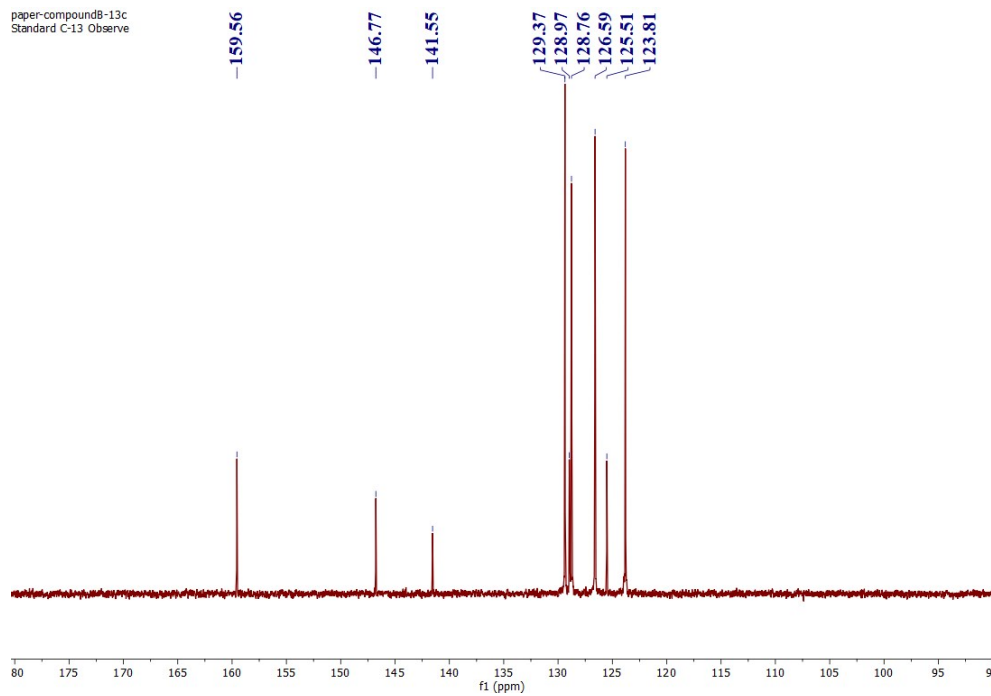

**Figure S2.**  $^{13}\text{C}$  NMR spectrum of compound **3**.

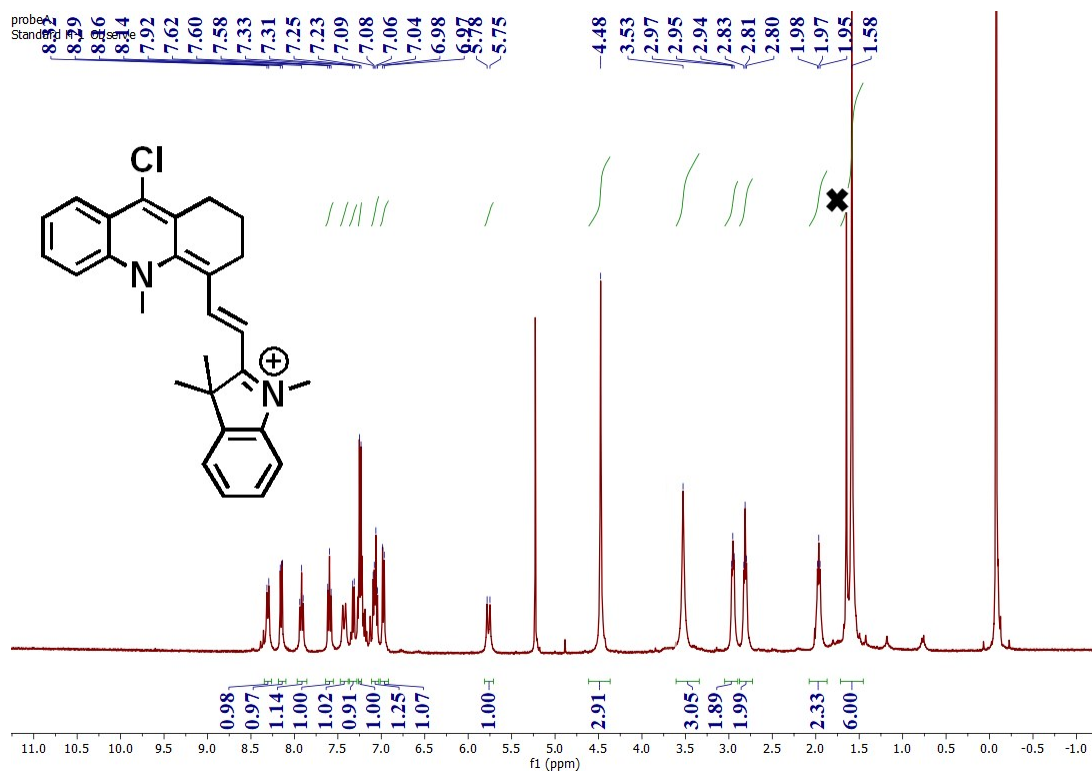

Figure S3.  $^1\text{H}$  NMR spectrum of probe A in  $\text{CDCl}_3$  solution.

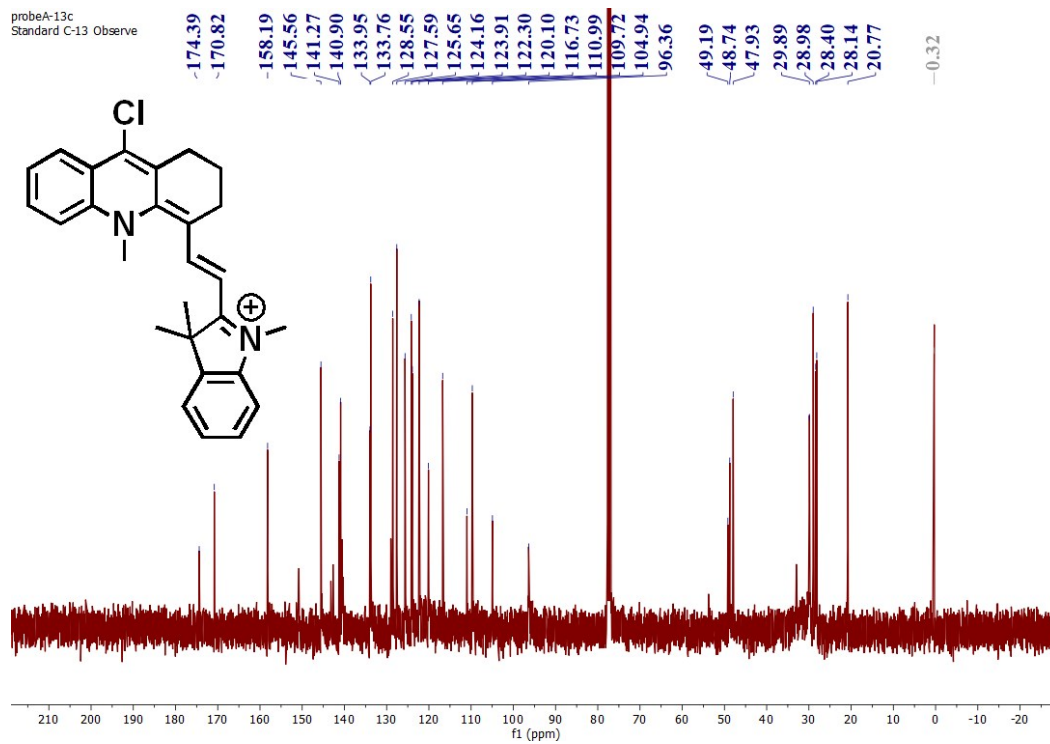

Figure S4.  $^{13}\text{C}$  NMR spectrum of probe A in  $\text{CDCl}_3$  solution.



Probe A\_150-1000 #1-50 RT: 0.01-0.67 AV: 50 NL: 5.82E7  
T: FTMS + p ESI Full ms [150.00-1000.00]

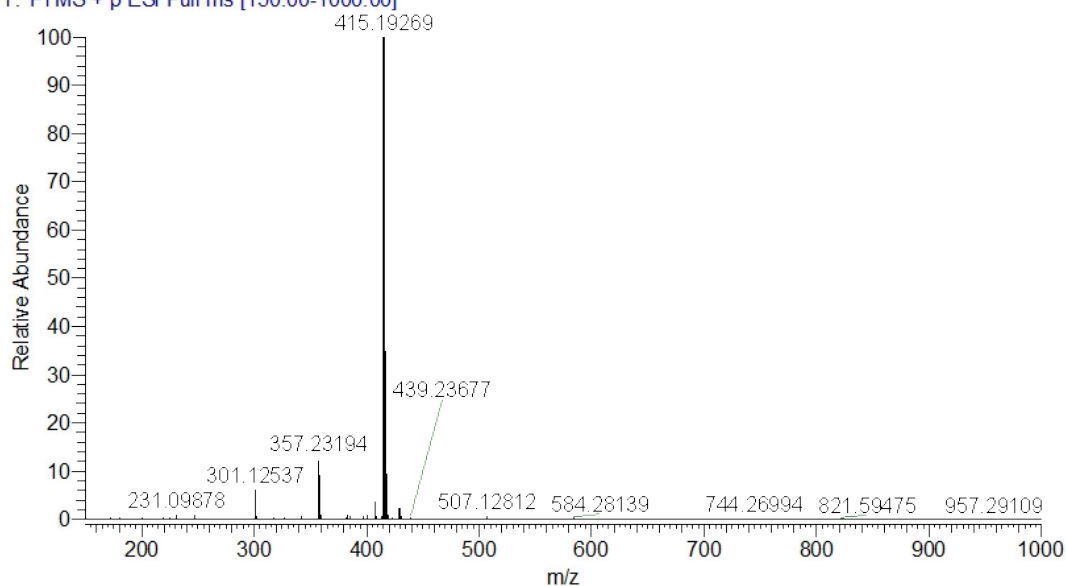

Figure S5. High-resolution ESI mass spectrum of probe A.

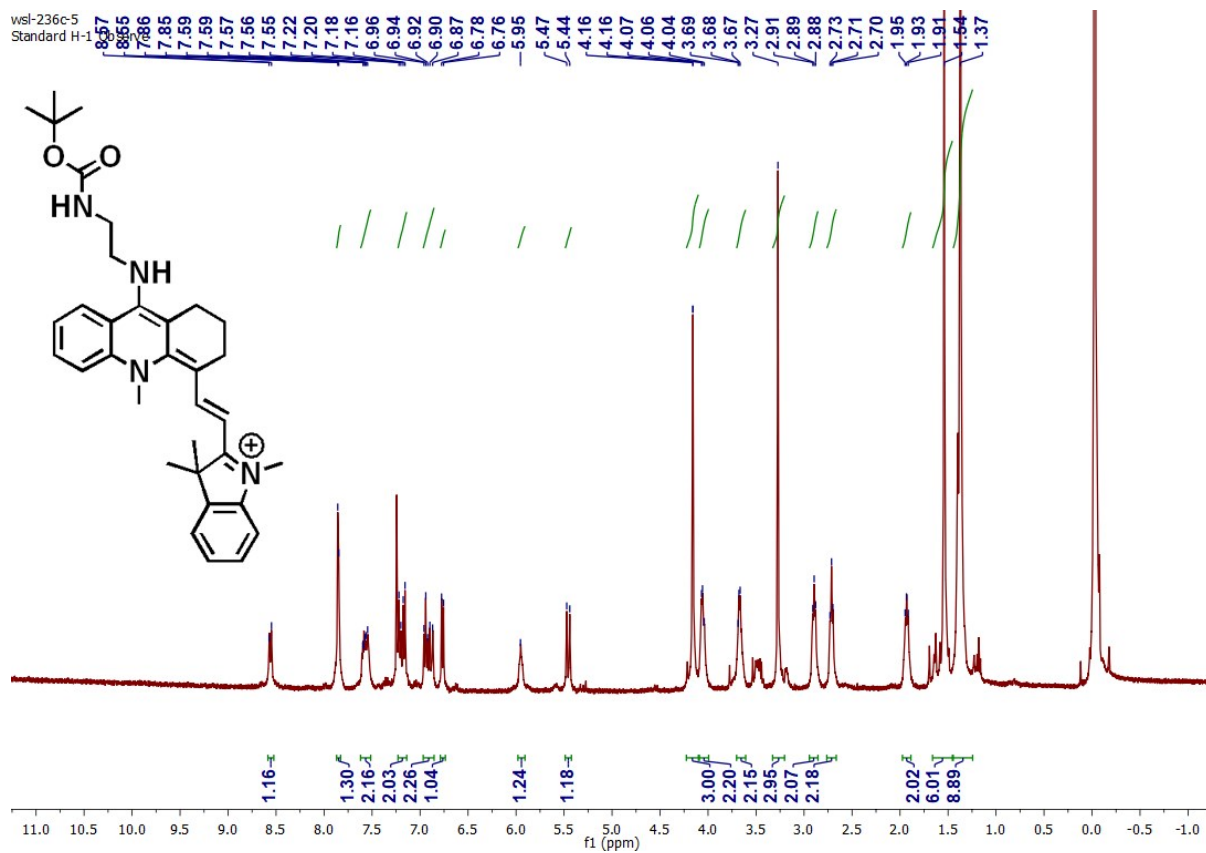

Figure S6. <sup>1</sup>H NMR spectrum of probe B in CDCl<sub>3</sub> solution.

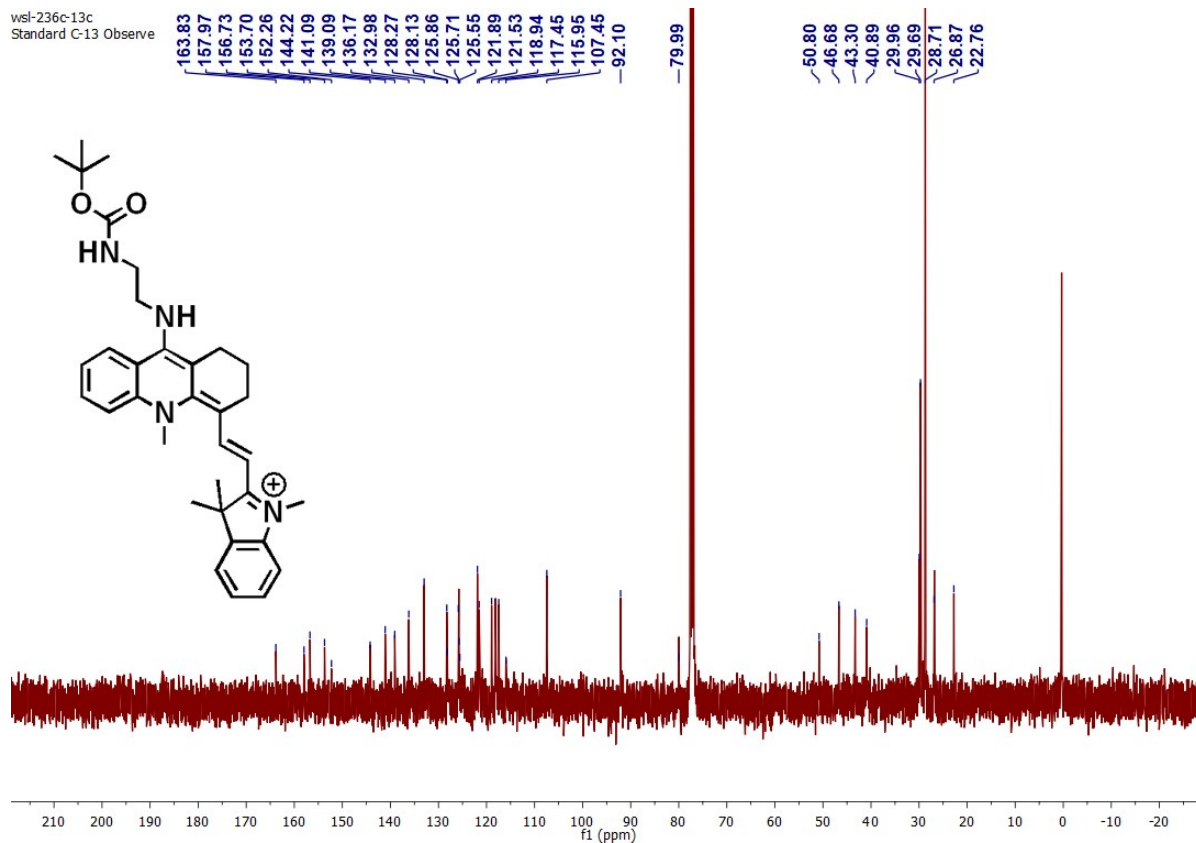

**Figure S7.**  $^{13}\text{C}$  NMR spectrum of probe **B** in  $\text{CDCl}_3$  solution.

Sample 1\_100-1000 #1-50 RT: 0.01-0.68 AV: 50 NL: 6.06E7  
T: FTMS + p ESI Full ms [100.00-1000.00]

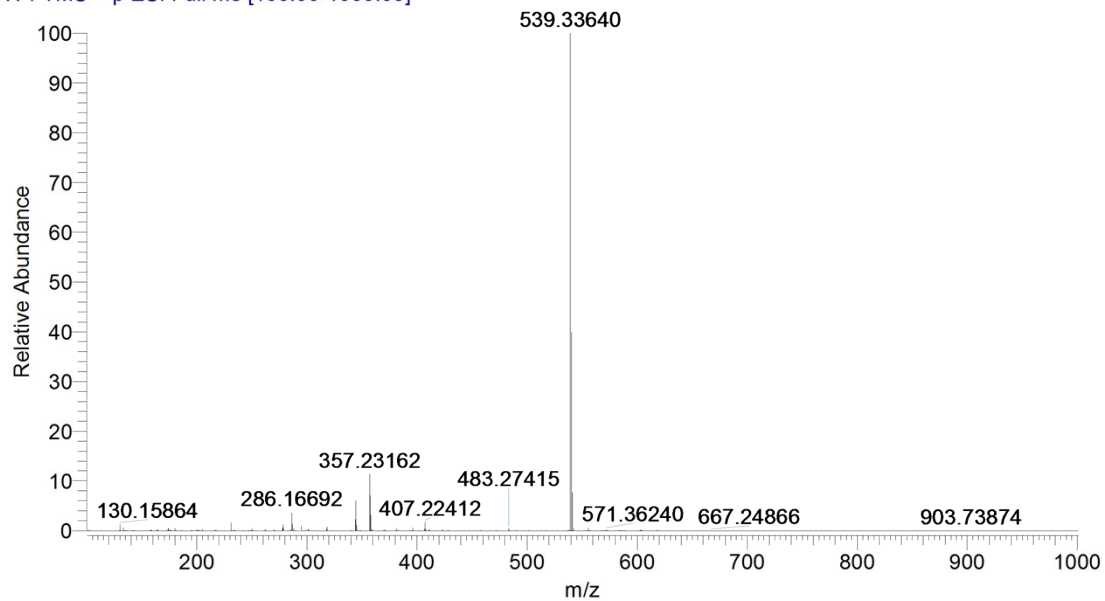

**Figure S8.** High-resolution ESI mass spectrum of probe **B**.

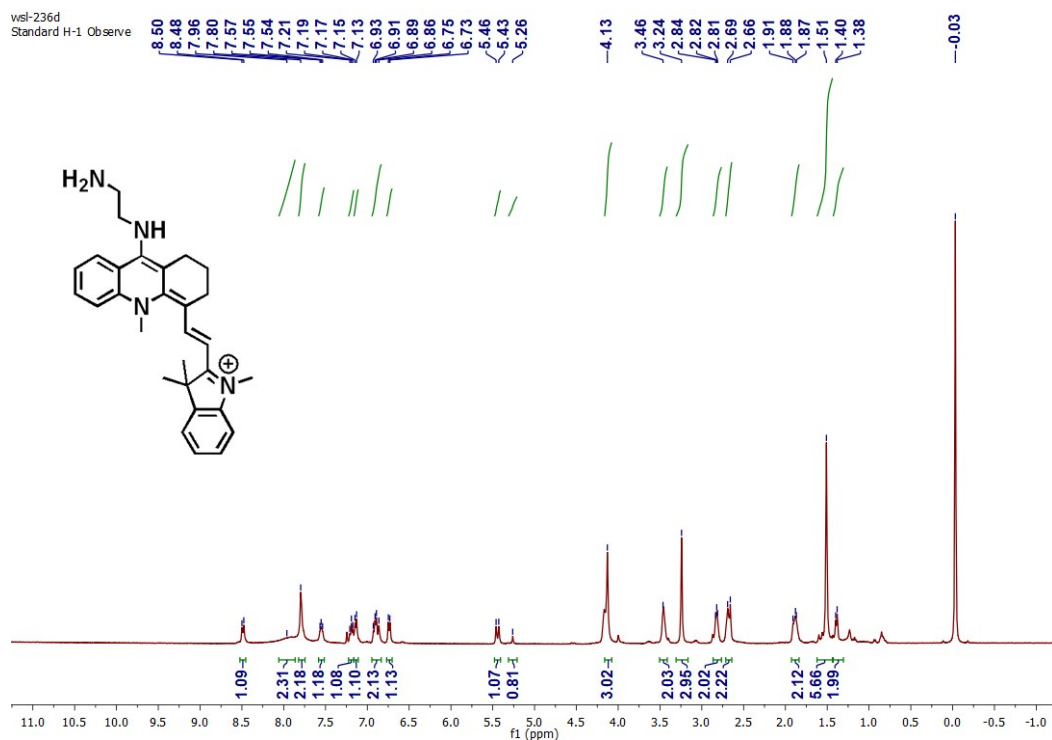

**Figure S9.**  $^1\text{H}$  NMR spectrum of probe C in  $\text{CDCl}_3$  solution.

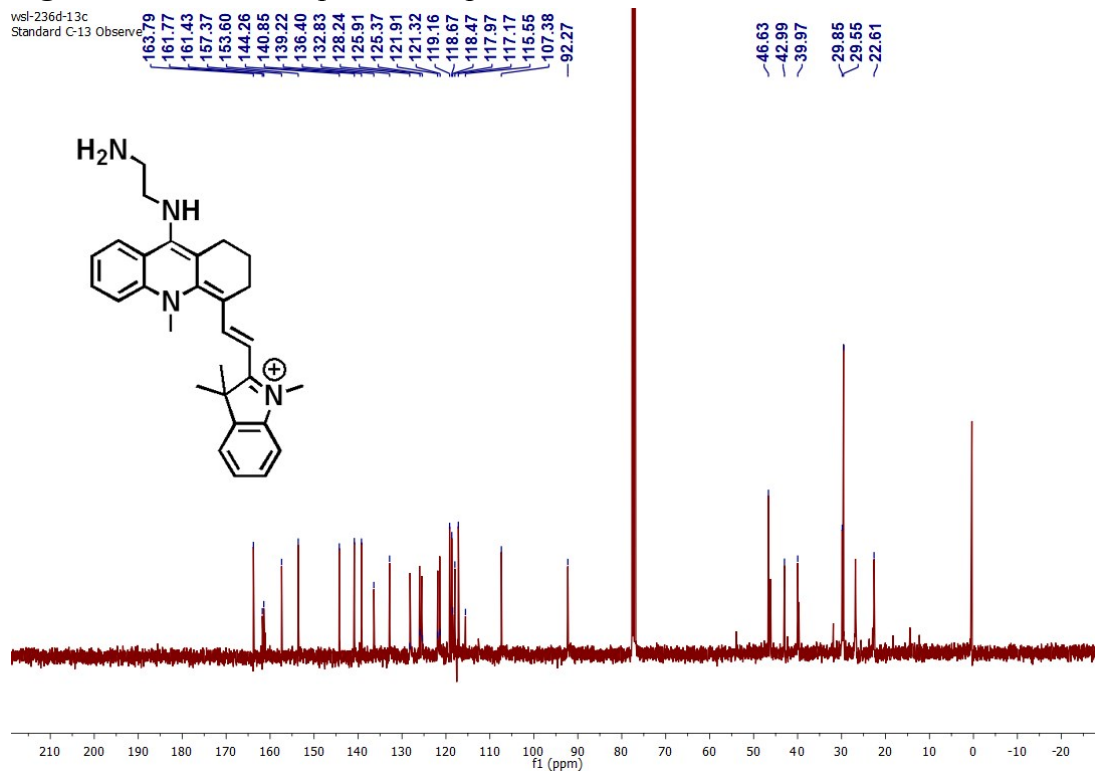

**Figure S10.**  $^{13}\text{C}$  NMR spectrum of probe C in  $\text{CDCl}_3$  solution.

Sample No Label\_100-1000 #1-50 RT: 0.01-0.68 AV: 50 NL: 5.33E7  
T: FTMS + p ESI Full ms [100.00-1000.00]

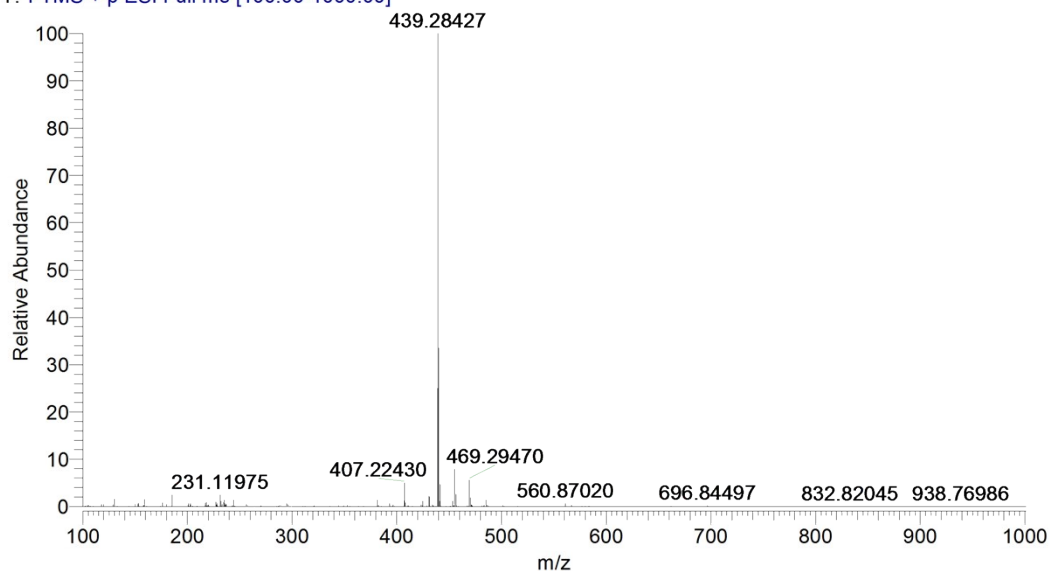

Figure S11. High-resolution ESI mass spectrum of probe C.

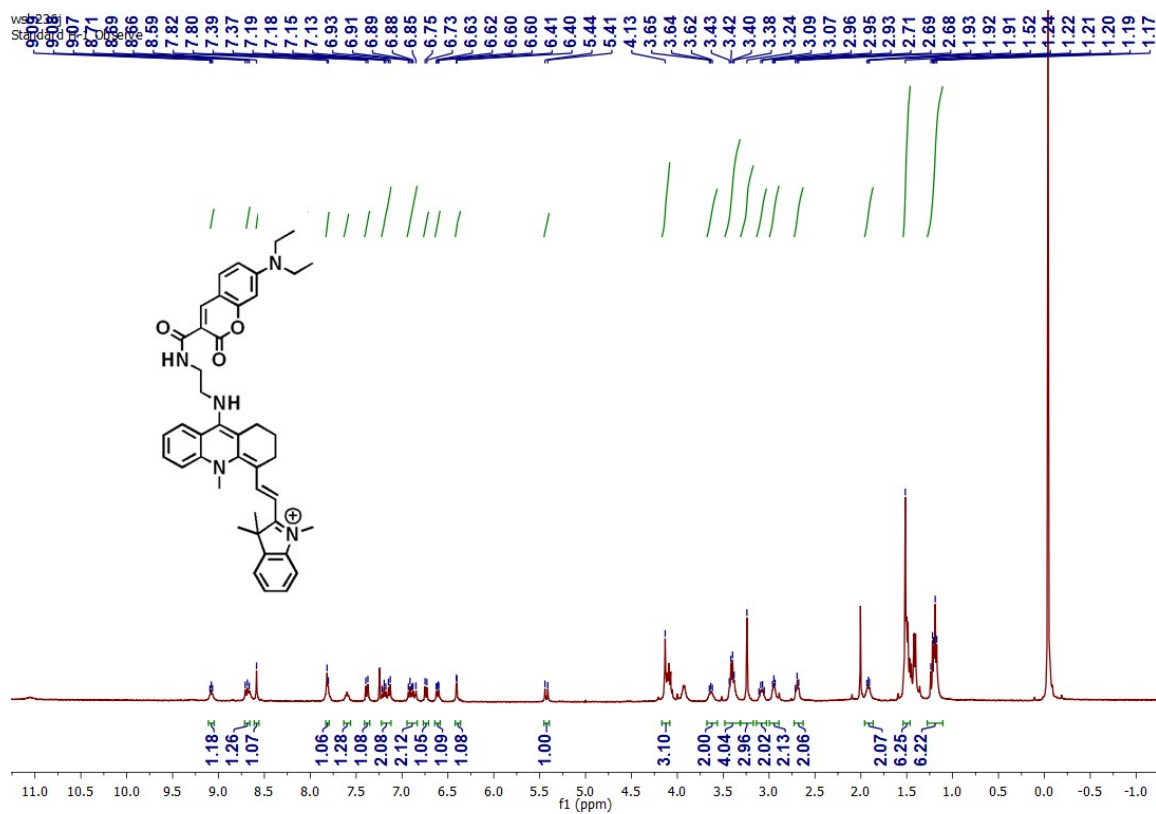

Figure S12.  $^1\text{H}$  NMR spectrum of probe D in  $\text{CDCl}_3$  solution.

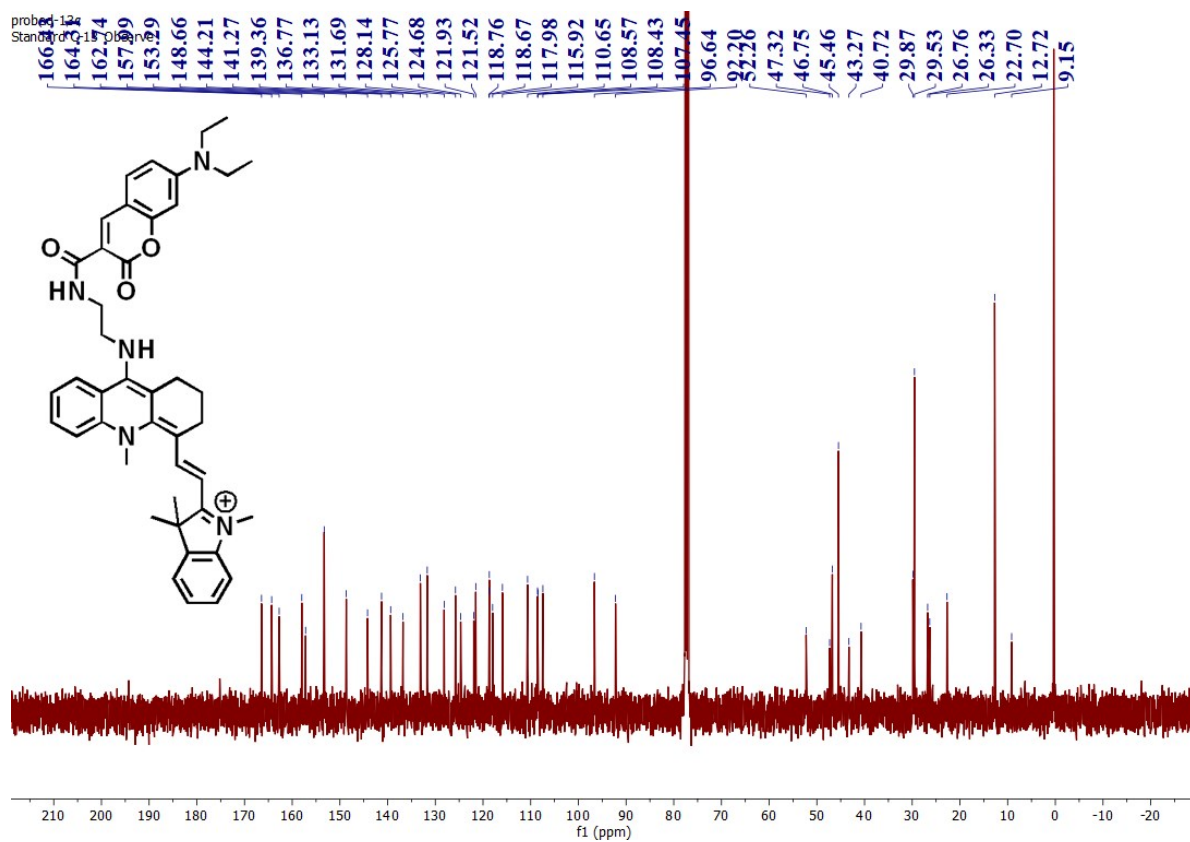

**Figure S13.**  $^{13}\text{C}$  NMR spectrum of probe **D** in  $\text{CDCl}_3$  solution.

Sample 3\_100-1000 #1-50 RT: 0.00-0.68 AV: 50 NL: 3.00E7  
T: FTMS + p ESI Full ms [100.00-1000.00]

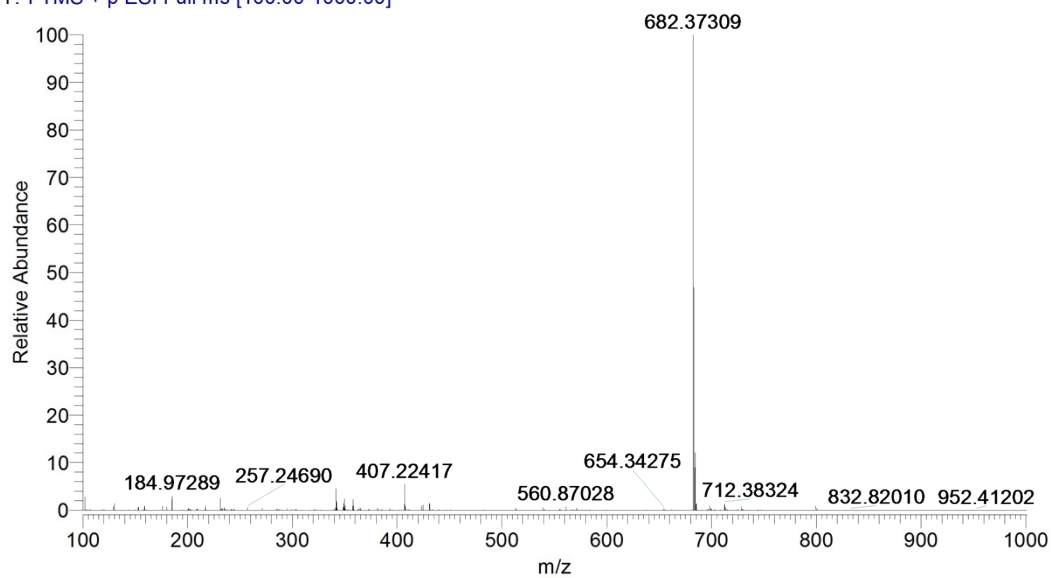

**Figure S14.** High-resolution ESI mass spectrum of probe **D**.

## Calculation of fluorescence quantum yields of the probes.

The fluorescence quantum yields of the fluorescent probes were calculated by employing cresyl violet in methanol with a fluorescent quantum yield of 54% as a reference standard. The UV-Vis absorption spectra of the probes were collected in the range from 300 to 800 nm with increments of 1 nm. For pH detection, we used 0.1 M citrate-phosphate buffer for the pH range from 2.0 to 7.8 and 0.1 M carbonate-bicarbonate buffer for a pH range from 8.0 to 10.0. The pH-responsive fluorescent spectra of probe **A**, **B**, and **C** were collected under 520 nm excitation with increments of 1 nm. The fluorescent measurements for probe **D** were conducted under 400 nm and 520 nm excitation with increments of 1 nm, respectively. The excitation and emission slit widths were set to 5 nm. The fluorescence quantum yields were calculated according to the literature, using the equation below:

$$\Phi_s = \Phi_r (A_r F_s / A_s F_r) (\eta_s^2 / \eta_r^2)$$

$\Phi$  is the fluorescence quantum yield, the subscripts 'r' and 's' stand for standard and sample, respectively, 'A' stands for absorbance, and  $\eta$  is the refractive index.

**Table S1.** Absorption and emission peaks, Stokes shift, molar absorptivity and fluorescence quantum yields of the probes **A**, **B**, **C** and **D**.

| Probe          | <i>Solvent</i>                   | $\lambda_{abs}$ (nm) | $\lambda_{em}$ (nm) | <i>Stoke Shift</i> (nm) | $\Phi_f$ (%) | $\epsilon$ ( $10^5 M^{-1} cm^{-1}$ ) |
|----------------|----------------------------------|----------------------|---------------------|-------------------------|--------------|--------------------------------------|
| Probe <b>A</b> | Buffer 7.0 containing 0.1 % DMSO | 592 nm               | 660 nm              | 68 nm                   | 0.53         | 0.25                                 |
| Probe <b>B</b> | Buffer 7.0 containing 0.1 % DMSO | 509 nm               | 640 nm              | 131 nm                  | 18.2         | 0.21                                 |
| Probe <b>C</b> | Buffer 7.0 containing 0.1 % DMSO | 512 nm               | 646 nm              | 134 nm                  | 10           | 0.17                                 |
| Probe <b>D</b> | Buffer 7.0 containing 0.1 % DMSO | 434 and 535 nm       | 466 and 647 nm      | 32 and 112 nm           | 5.2          | 0.28/0.12                            |

Fluorescence quantum yields of fluorescence probes are significantly dependents on organic solvent percent concentration in buffer solutions. Probe **A** shows low fluorescence of 2% due to an electron-withdrawing chlorine atom, while probes **B-D** display high fluorescence quantum yields of 60%, 32%, and 35% in aqueous solutions, respectively. However, Probe **A** shows low fluorescence quantum yield of 0.53% in pH 7.0 buffer solution containing 0.1% dimethyl

sulfoxide (DMSO). Probes **B**, **C** and **D** display reduced fluorescence quantum yields of 18.2%, 10% and 4.8% in pH 7.0 buffer solution containing 0.1% DMSO. Fluorescence quenching of the probes in almost pure buffer solvents are due to aggregation-induced quenching effect, especially for probe **D**, which is more hydrophobic.

## Determination of the probe pK<sub>a</sub> values by fluorometric titration

The pK<sub>a</sub> values of fluorescent probes **A**, **B**, **C**, and **D** were calculated using the following equation by fluorometric titration as a function of the pH, which was obtained by using the fluorescence spectra. The expression of the steady-state fluorescence intensity  $F$  as a function of the proton concentration has been extended for the case of n: 1 complex between H<sup>+</sup> and a fluorescent dye.

$$F = \frac{F_{\min}[H^+]^n + F_{\max}K_a}{K_a + [H^+]^n}$$

$F_{\min}$  and  $F_{\max}$  stand for the fluorescence intensities at maximal and minimal H<sup>+</sup> concentrations, respectively, while  $n$  is the apparent stoichiometry of H<sup>+</sup> binding to the probes **A**, **B**, and **C**. Fluorescence titration data were plotted as a function of the H<sup>+</sup> concentration and a nonlinear fitting is displayed in Figures S17, S19 and S20.

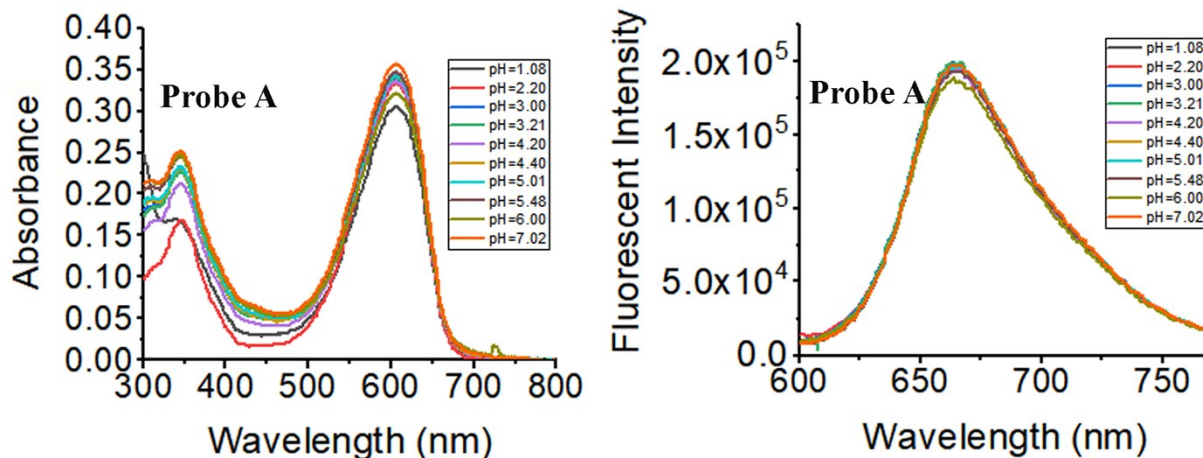

**Figure S15.** Absorption and fluorescence spectra of 5 μM probe **A** in different pH buffer solutions.

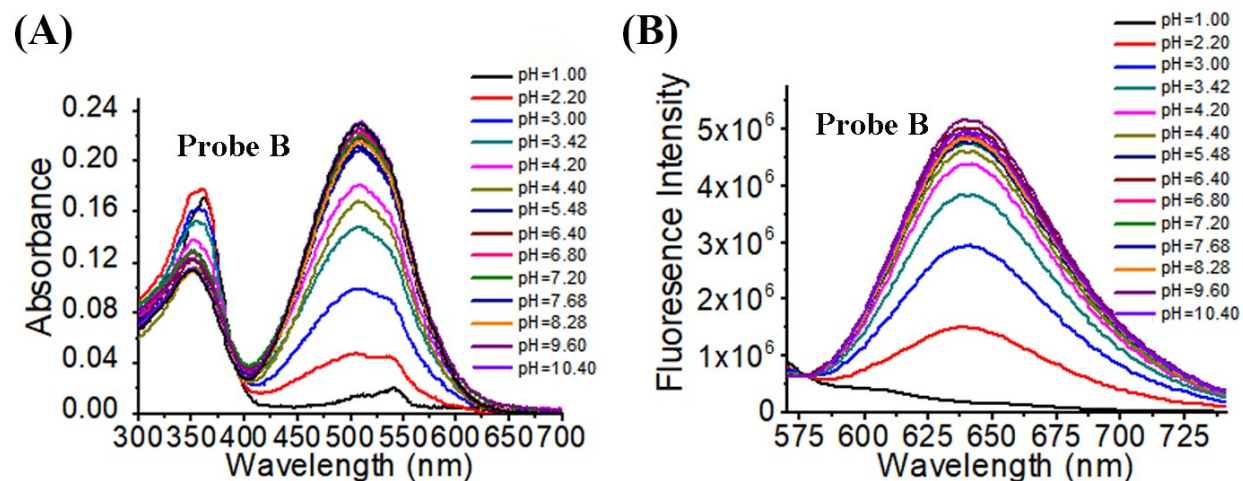

**Figure S16.** Absorbance (A) and fluorescence (B) responses of 5  $\mu\text{M}$  probe **B** to pH changes in buffer solutions.

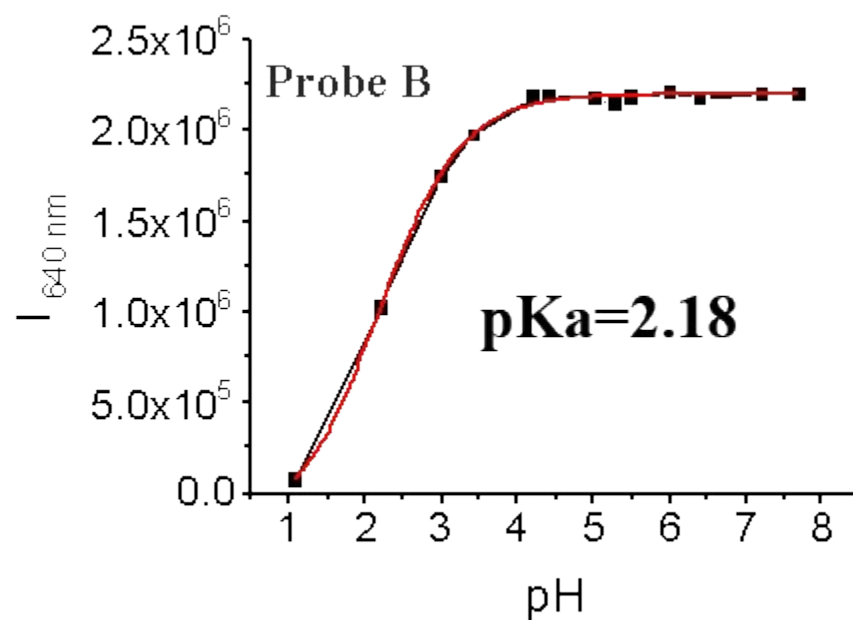

**Figure S17.** Fluorescence responses of 5  $\mu\text{M}$  probe **B** to pH changes in buffer solutions.



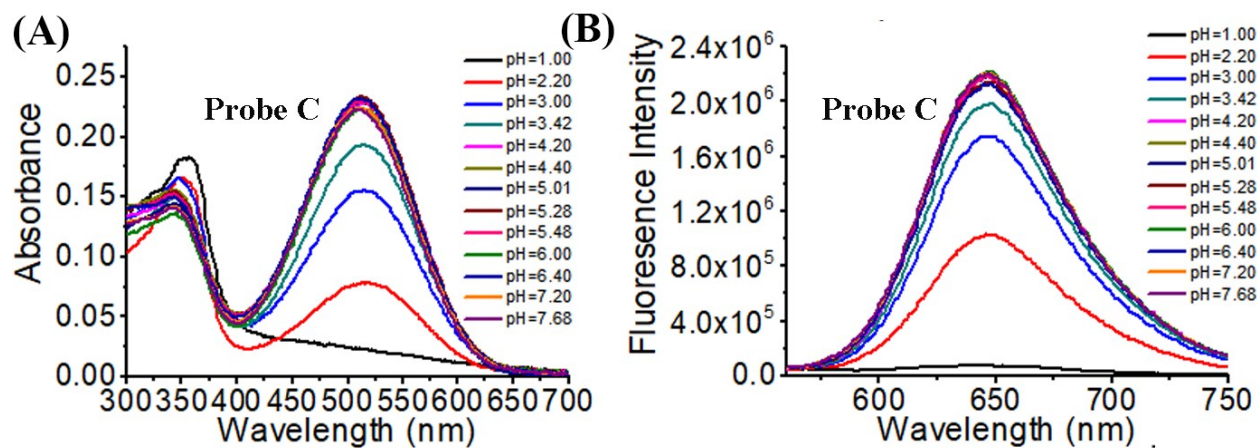

**Figure S18.** Absorbance (A) and fluorescence (B) responses of 5  $\mu\text{M}$  probe C to pH changes in buffer solutions.

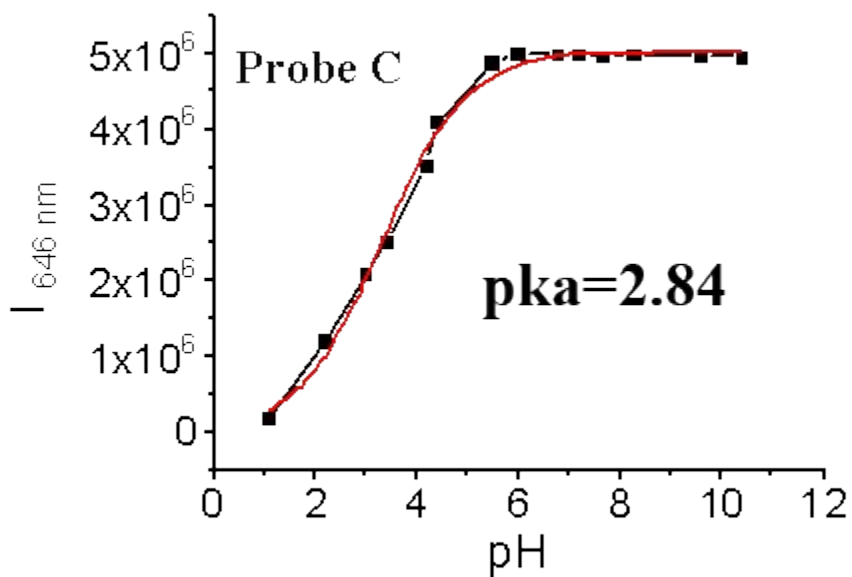

**Figure S19.** Fluorescence responses of 5  $\mu\text{M}$  probe C to pH changes in buffer solutions.

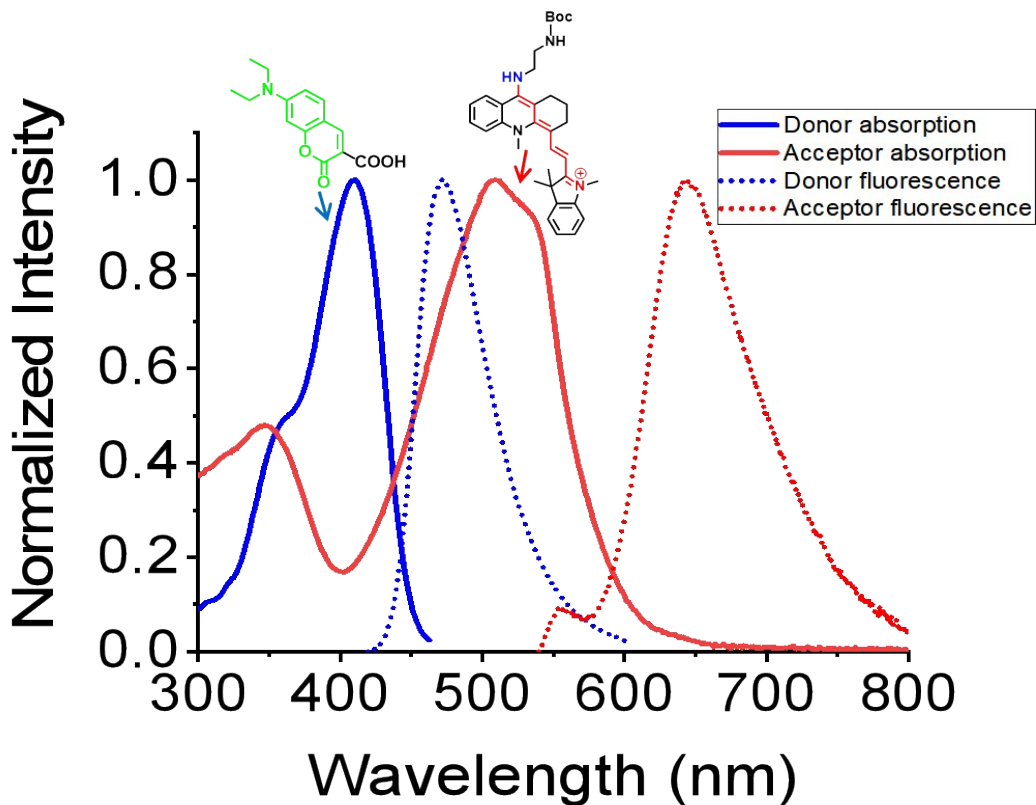

**Figure S20.** Absorption and emission spectra of 7-(diethylamino)coumarin-3-carboxylic acid and probe **B** in pH 7.0 buffer solution containing 1% dimethyl sulfoxide.

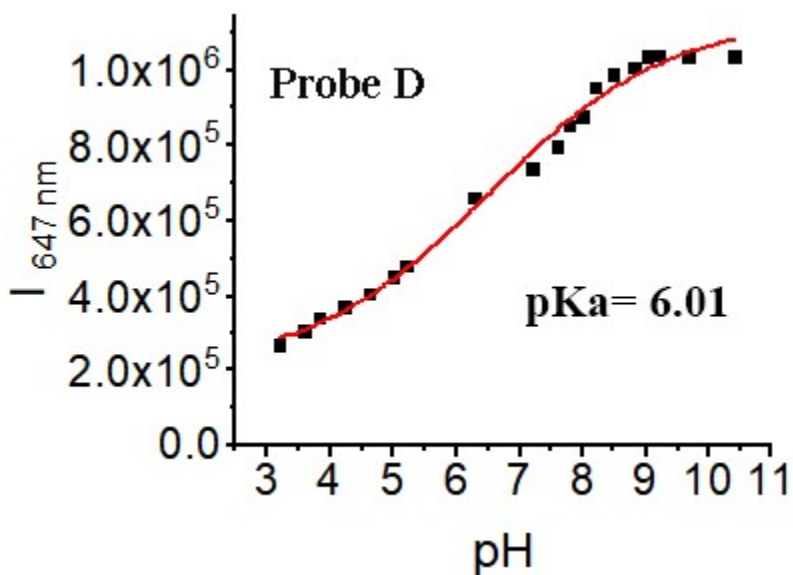

**Figure S21.** Fluorescence responses of 5  $\mu\text{M}$  probe **D** to pH changes in buffer solutions.

## The reversible fluorescence responses of the probes to pH changes

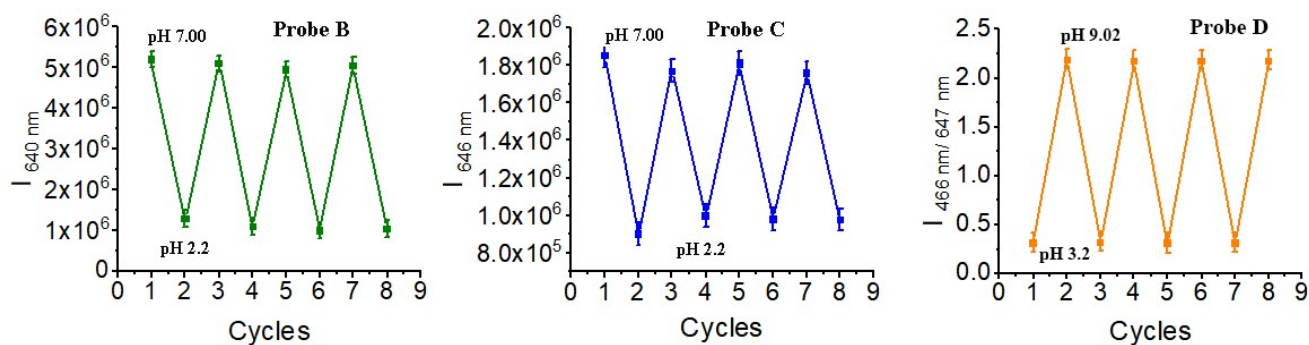

**Figure S22.** Fluorescence responses of 5  $\mu$ M probes **B**, **C**, and **D** to pH change from 7.00 to 2.20 under 540 nm excitation.

Probe B+\_150-1000 #1-50 RT: 0.01-0.68 AV: 50 NL: 3.96E7  
T: FTMS + p ESI Full ms [150.00-1000.00]

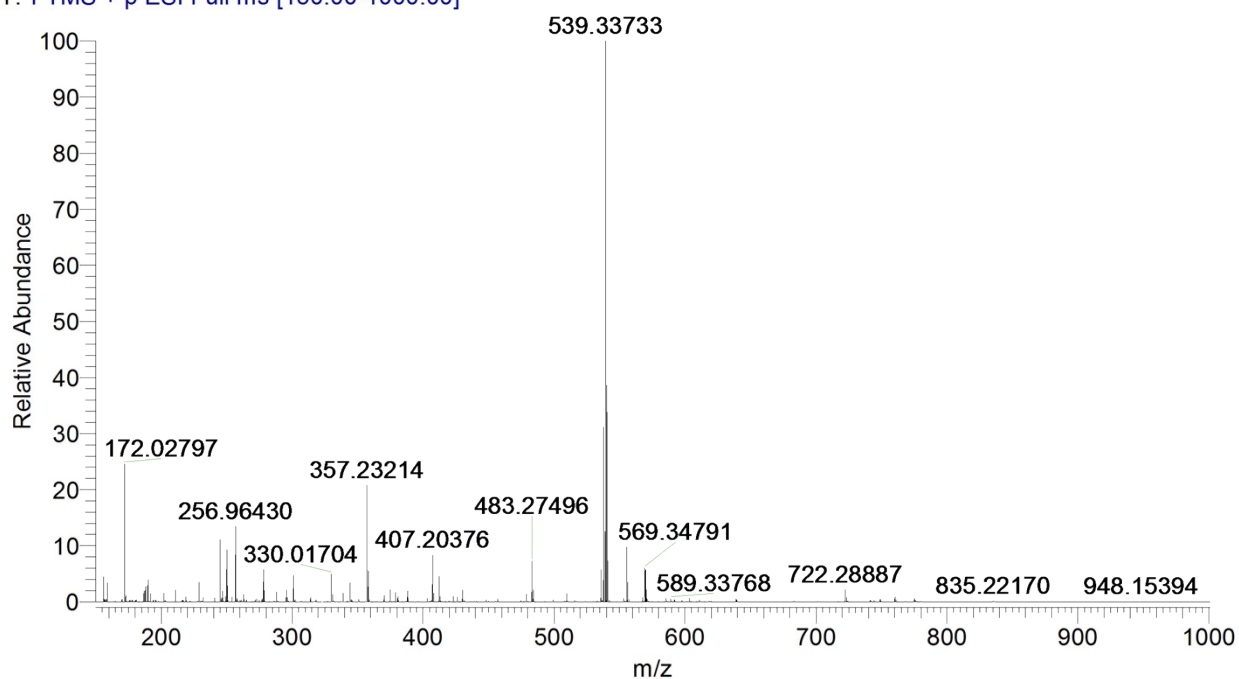

**Figure S23.** HR-ESI-MS spectrum of probe **B** after treatment with TFA.

Sample 2+\_100-1000 #1-49 RT: 0.01-0.69 AV: 49 NL: 3.86E6  
T: FTMS + p ESI Full ms [100.00-1000.00]

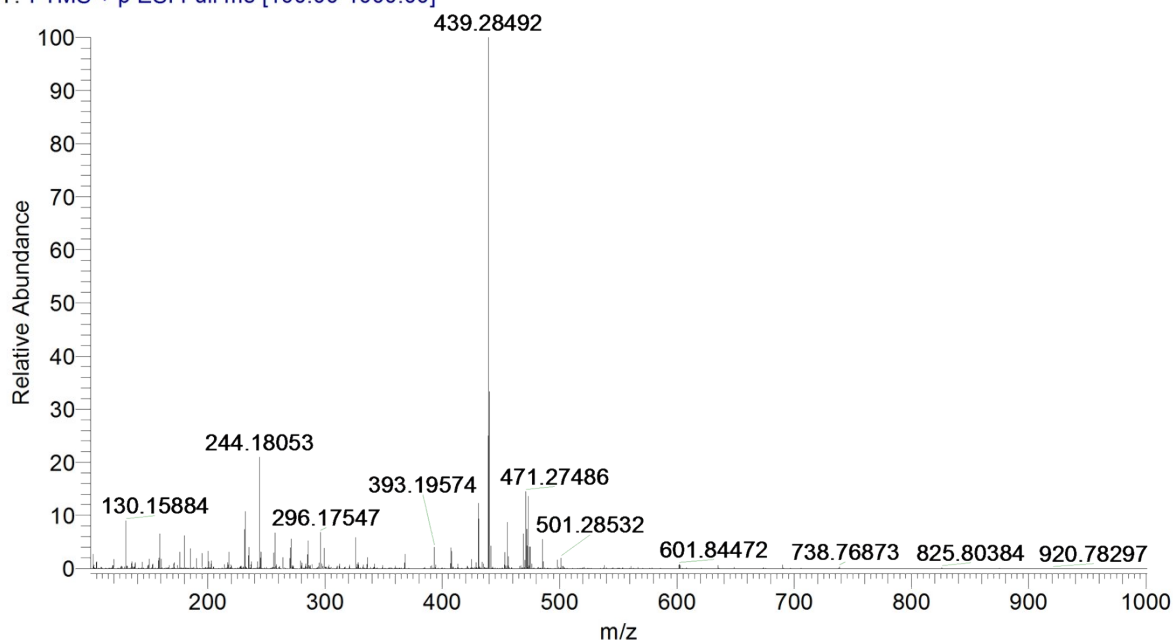

**Figure S24.** HR-ESI-MS spectrum of probe **C** after treatment with TFA.

Sample 3+\_100-1000 #1-50 RT: 0.01-0.71 AV: 50 NL: 8.06E5  
T: FTMS + p ESI Full ms [100.00-1000.00]

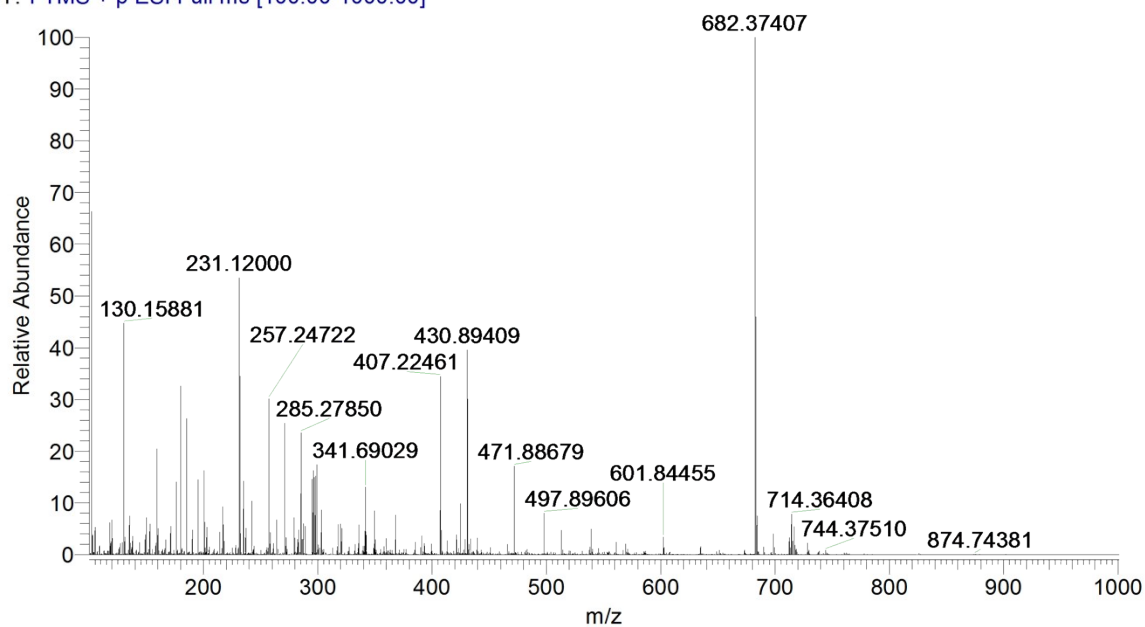

**Figure S25.** HR-ESI-MS spectrum of probe **D** after treatment with TFA.

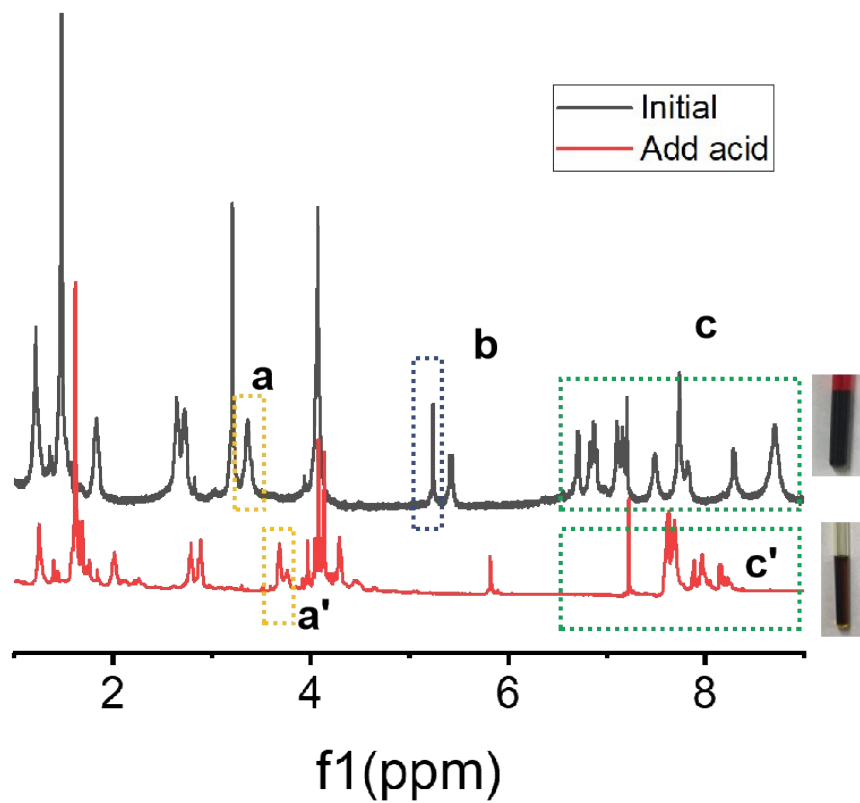

**Figure S26.** <sup>1</sup>H NMR spectrum of probe C before (gray line) and after (red line) treatment with TFA.

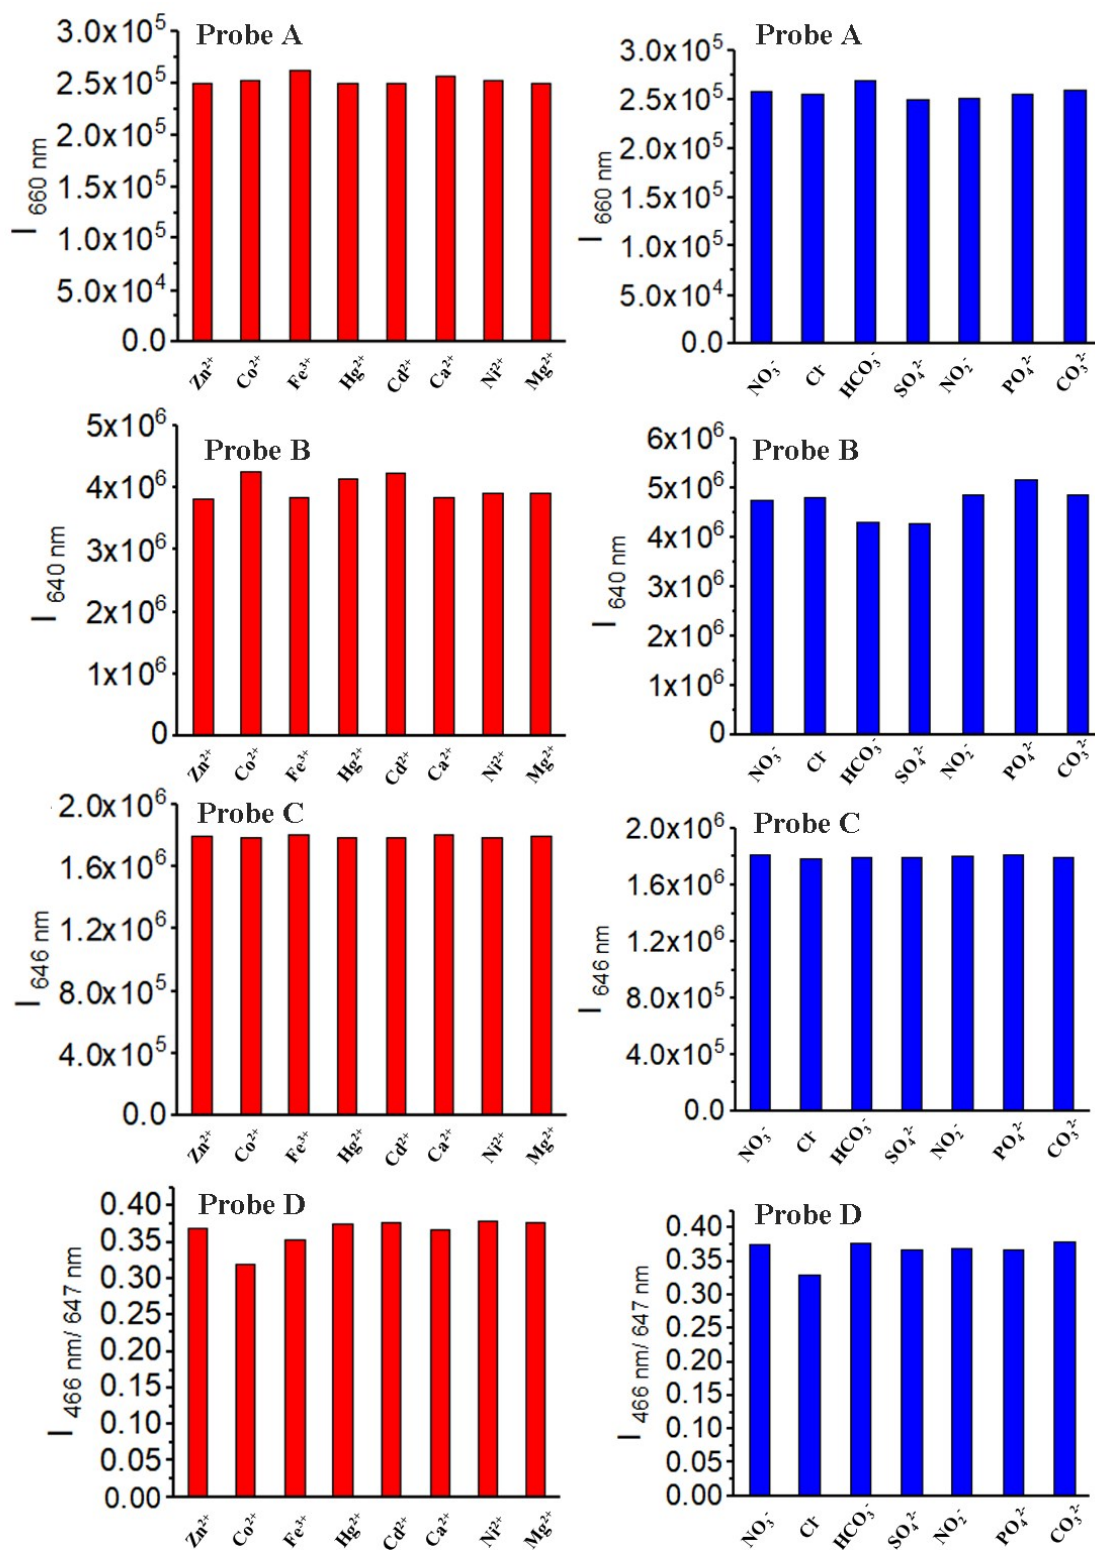

**Figure S27.** Fluorescent response of 5  $\mu$ M probes A, B, C, and D to different anions and cations in PBS=7.0 buffer.

### Photostability of the probes

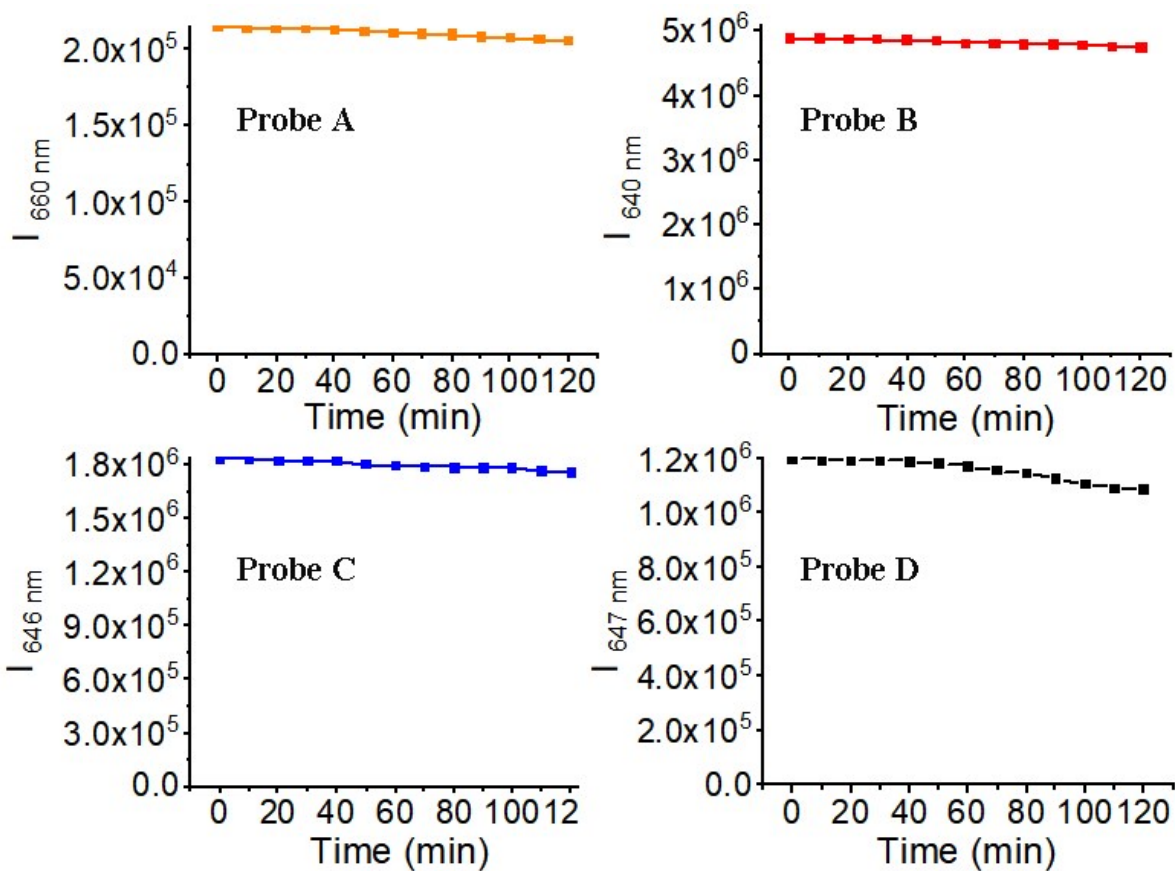

**Figure S28.** Fluorescence intensity of 5  $\mu$ M probes A, B, C, and D under continuous 520 nm excitation.

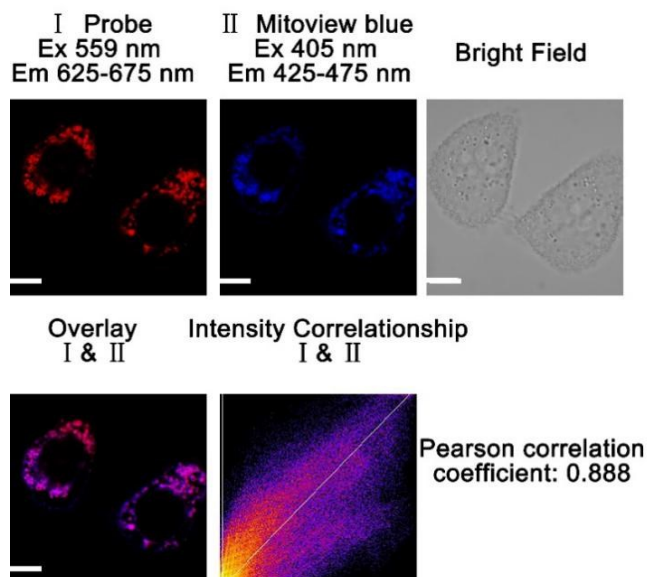

**Figure S29.** Fluorescence images of HeLa cells incubated with 5  $\mu$ M probe **A** and 5  $\mu$ M Mitoview blue for 15 minutes under excitation of 559 nm and 405 nm for probe **A** and Mitoview blue, respectively. Scale bar: 20  $\mu$ m. The cells were washed with cell culture medium twice after 15-minute incubation of HeLa cells with probe **A** and Mitoview blue before cellular imaging was conducted, using confocal fluorescence microscope.

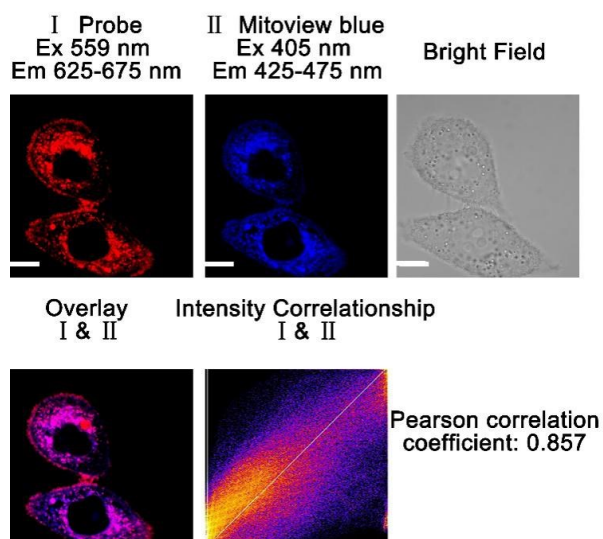

**Figure S30.** Fluorescence images of 5  $\mu$ M probe **B** and Mitoview blue in HeLa cells under excitation of 559 nm and 405 nm for probe **B** and Mitoview blue, respectively. Scale bar: 20  $\mu$ m. The cells were washed with cell culture medium twice after a 15-minute incubation of HeLa cells with probe **B** and Mitoview blue before cellular imaging was conducted, using confocal fluorescence microscope.



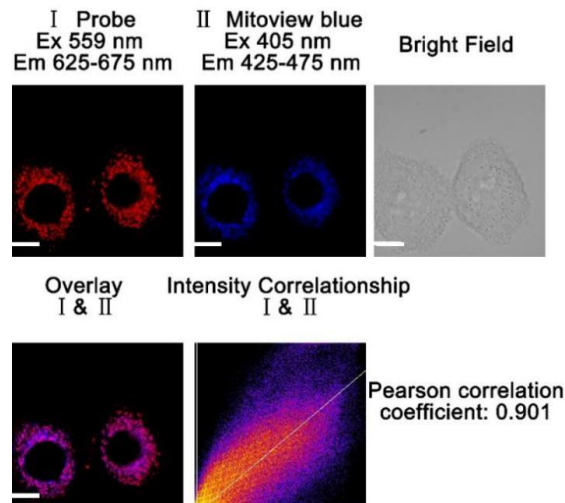

**Figure S31.** Fluorescence images of 5  $\mu\text{M}$  probe **C** and Mitoview blue in HeLa cells under excitation of 559 nm and 405 nm for probe **C** and Mitoview blue, respectively. Scale bar: 20  $\mu\text{m}$ . The cells were washed with cell culture medium twice after a 15-minute incubation of HeLa cells with probe **C** and Mitoview blue before cellular imaging was conducted, using confocal fluorescence microscope.

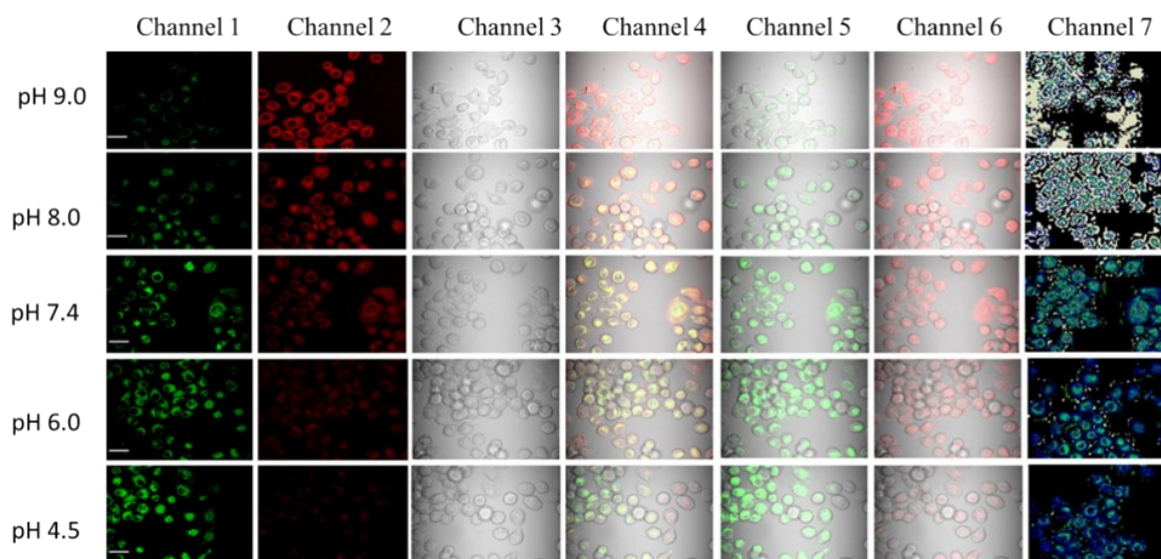

**Figure S32.** Fluorescence images of HeLa cells incubated with 5  $\mu\text{M}$  probe **D** under different cellular pH conditions with scale bars of 50  $\mu\text{m}$ . HeLa cells were incubated with 5  $\mu\text{M}$  probe **D** for 15 minutes, washed with cell culture medium twice, and then incubated in different pH buffers in the presence of 5  $\mu\text{g/mL}$  nigericin, a  $\text{K}^+/\text{H}^+$  ionophore for 20 minutes. Channel 1: the coumarin donor fluorescence collected from 475 to 525 nm at 405 nm excitation. Channel 2: the cyanine acceptor fluorescence collected from 600 to 700 nm at 405 nm excitation. Channel 3: bright-field. Channel 4: merged images of channels 1, 2, and 3. Channel 5: merged images of channels 1 and 3. Channel 6: merged images of channels 2 and 3. Channel 7: ratiometric images of channel 1 divided by channel 2, which were acquired with Image-Pro software.

## Theoretical Calculations

### Methods.

Models of all probes were generated using ChemDraw, with (molecular mechanics) MM2 minimizing the energies of a Chem3d model<sup>1</sup>, followed by force field (UFF) calculations in Avogadro.<sup>2</sup> Convergence of the atomic positions in the models were obtained using Gaussian 16<sup>3</sup> and density functional theory (DFT), using the APFD functional<sup>4</sup> and electron basis sets at the 6-311g(d) level in a Polarizable Continuum Model (PCM) of water.<sup>5</sup> Imaginary frequencies were not obtained. Excited states were assessed, using TD-DFT optimizations in a Polarizable Continuum Model (PCM)<sup>5</sup> in water with the 6-311+g(d) basis set. Results were interpreted using GaussView 6<sup>6</sup> for all data and figures. For the pKa calculations on probes **B-D**, the SMD<sup>7</sup> implicit solvation model in water was conducted. The effect of adding one water molecule directly hydrogen-bonded to the site being protonated/deprotonated was investigated.<sup>8</sup>

### Results of the theoretical calculations.

#### Theoretical calculations for probe A.

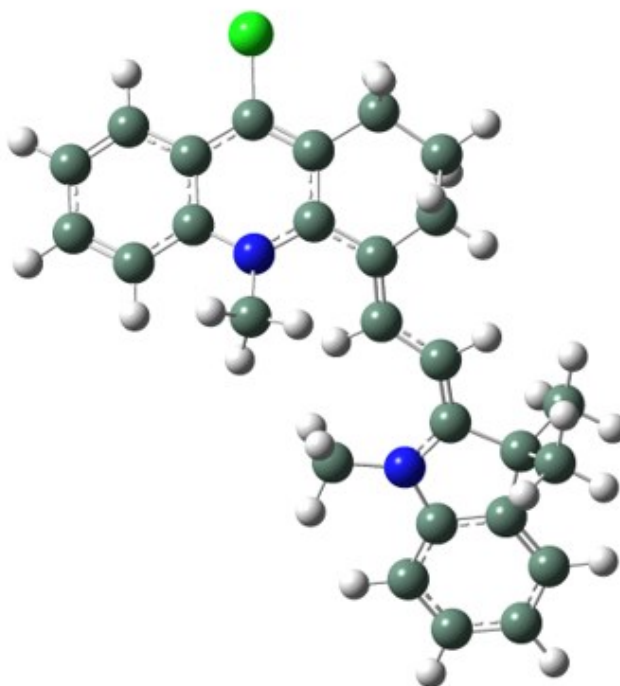

**Figure S33.** GaussView representation of probe A.

**Table S2.** Calculated atomic coordinates for probe **A** in water.

| Row | Symbol | X        | Y        | Z        | Row | Symbol | X        | Y        | Z        |
|-----|--------|----------|----------|----------|-----|--------|----------|----------|----------|
| 1   | C      | 5.631056 | 2.858637 | -0.50616 | 30  | Cl     | 5.639127 | -1.53469 | -1.05066 |
| 2   | C      | 4.568939 | 3.53248  | 0.109956 | 31  | H      | 6.501783 | 3.408708 | -0.84679 |
| 3   | C      | 3.456947 | 2.84357  | 0.547897 | 32  | H      | 4.609996 | 4.609145 | 0.239006 |
| 4   | C      | 3.375941 | 1.45187  | 0.37263  | 33  | H      | 2.640448 | 3.392591 | 0.997807 |
| 5   | C      | 4.439396 | 0.765731 | -0.25811 | 34  | H      | 6.381271 | 0.973887 | -1.16956 |
| 6   | C      | 5.563924 | 1.495642 | -0.68706 | 35  | H      | 1.337972 | -2.93043 | 1.842599 |
| 7   | N      | 2.274355 | 0.742702 | 0.823748 | 36  | H      | -0.17241 | -3.09894 | 0.971995 |
| 8   | C      | 2.067002 | -0.56386 | 0.483712 | 37  | H      | 1.601063 | -4.40874 | -0.18343 |
| 9   | C      | 3.146856 | -1.31109 | -0.08911 | 38  | H      | 1.058964 | -3.07658 | -1.1996  |
| 10  | C      | 4.300866 | -0.64598 | -0.4067  | 39  | H      | 3.617691 | -3.29861 | 0.44504  |
| 11  | C      | 0.80049  | -1.19773 | 0.693564 | 40  | H      | 3.471584 | -3.05581 | -1.27775 |
| 12  | C      | 0.8341   | -2.6874  | 0.898625 | 41  | H      | -0.23856 | 0.545754 | 0.172281 |
| 13  | C      | 1.583489 | -3.31808 | -0.26852 | 42  | H      | -1.78124 | -2.04294 | 0.793924 |
| 14  | C      | 3.012132 | -2.79555 | -0.32095 | 43  | H      | -4.62221 | 3.241698 | -0.77162 |
| 15  | C      | -0.36353 | -0.4818  | 0.488795 | 44  | H      | -7.04557 | 3.107902 | -1.22588 |
| 16  | C      | -1.66984 | -0.99524 | 0.538206 | 45  | H      | -8.25382 | 0.958877 | -1.05927 |
| 17  | C      | -2.86706 | -0.37371 | 0.24073  | 46  | H      | -7.03557 | -1.11822 | -0.42588 |
| 18  | N      | -3.1302  | 0.930068 | -0.00649 | 47  | H      | -3.79079 | -2.5218  | 1.8199   |
| 19  | C      | -4.48536 | 1.12082  | -0.32605 | 48  | H      | -4.5789  | -1.00392 | 2.288786 |
| 20  | C      | -5.15164 | -0.09806 | -0.23932 | 49  | H      | -5.50121 | -2.26482 | 1.45406  |
| 21  | C      | -4.16796 | -1.16573 | 0.151932 | 50  | H      | -3.32935 | -3.01022 | -0.65258 |
| 22  | C      | -5.13853 | 2.292258 | -0.68269 | 51  | H      | -5.03982 | -2.75929 | -1.02396 |
| 23  | C      | -6.5076  | 2.208211 | -0.94273 | 52  | H      | -3.80288 | -1.8342  | -1.89096 |
| 24  | C      | -7.18922 | 0.996483 | -0.85048 | 53  | H      | -1.53029 | 2.086713 | -0.74232 |
| 25  | C      | -6.50761 | -0.17134 | -0.49586 | 54  | H      | -1.61915 | 1.90945  | 1.035214 |
| 26  | C      | -4.52675 | -1.77353 | 1.515238 | 55  | H      | -2.75328 | 2.95946  | 0.192844 |
| 27  | C      | -4.07437 | -2.25726 | -0.92101 | 56  | H      | 2.105317 | 1.885975 | 2.55693  |
| 28  | C      | -2.19955 | 2.027001 | 0.11908  | 57  | H      | 0.777073 | 2.144648 | 1.408115 |
| 29  | C      | 1.444629 | 1.399377 | 1.840502 | 58  | H      | 0.857139 | 0.645674 | 2.354761 |

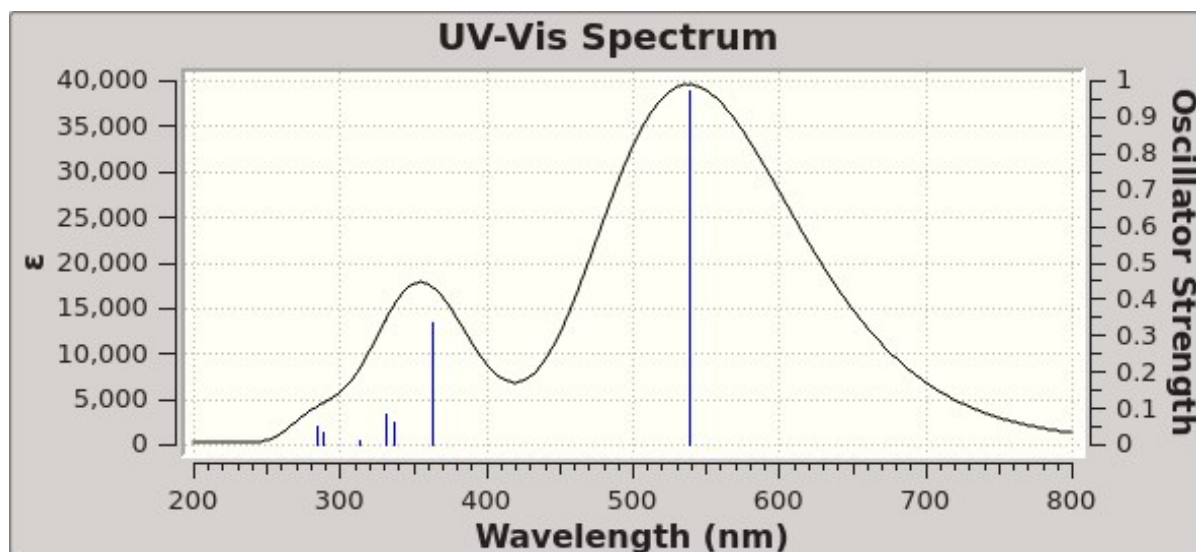

**Figure S34.** Calculated UV-Vis spectrum for probe A in water.

**Table S3.** Excitation energies and oscillator strengths listing for Probe A in water.

| Excited State | Nature | E (eV) | $\lambda$ (nm) | $f$    | Orbital transitions | Normalized coefficient |
|---------------|--------|--------|----------------|--------|---------------------|------------------------|
| 1:            | A      | 2.3030 | 538.37         | 0.9728 | 110 ->111           | 0.70704                |
| 2:            | A      | 3.4109 | 363.50         | 0.3379 | 110 ->112           | 0.69163                |
| 3:            | A      | 3.6758 | 337.30         | 0.0631 | 108 ->111           | -0.21913               |
|               |        |        |                |        |                     | 109 ->111 0.65445      |
|               |        |        |                |        |                     | 110 ->113 -0.10503     |
| 4:            | A      | 3.7412 | 331.40         | 0.0839 | 108 ->111           | 0.65776                |
|               |        |        |                |        |                     | 109 ->111 0.22307      |
| 5:            | A      | 3.9635 | 312.82         | 0.0116 | 107 ->111           | 0.68956                |
|               |        |        |                |        |                     | 110 ->114 -0.11646     |
| 6:            | A      | 4.2879 | 289.15         | 0.0351 | 106 ->111           | -0.14388               |
|               |        |        |                |        |                     | 110 ->113 0.64771      |
|               |        |        |                |        |                     | 110 ->114 -0.18699     |
| 7:            | A      | 4.3686 | 283.81         | 0.0487 | 106 ->111           | 0.62694                |
|               |        |        |                |        |                     | 108 ->112 -0.25433     |
|               |        |        |                |        |                     | 108 ->113 -0.10809     |

|                   |                                                                                     |
|-------------------|-------------------------------------------------------------------------------------|
| <b>110-HOMO</b>   | 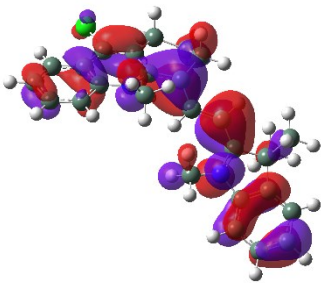   |
| <b>111-LUMO</b>   |    |
| <b>112-LUMO+1</b> |  |

**Figure S35.** Drawings of selected molecular orbitals listed in Table S2.

Theoretical calculations for probe B.

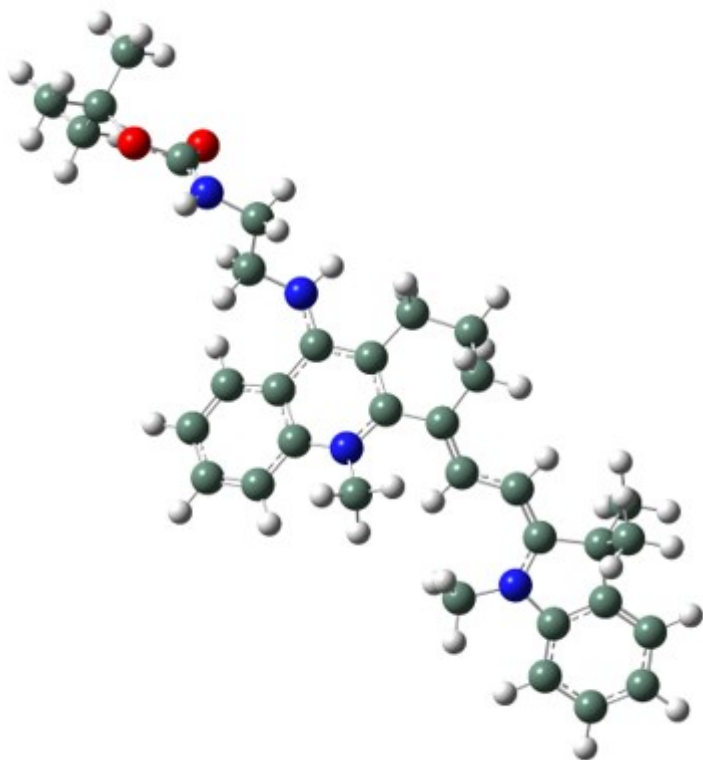

**Figure S36.** GaussView representation of probe **B**.

**Table S4.** Calculated atomic coordinates for probe **B** in water.

| Row | Symbol | X        | Y        | Z        | Row | Symbol | X        | Y        | Z        |
|-----|--------|----------|----------|----------|-----|--------|----------|----------|----------|
| 1   | C      | 2.407113 | 3.717675 | -0.61701 | 41  | H      | 3.136747 | 4.372828 | -1.08098 |
| 2   | C      | 1.297163 | 4.253972 | 0.047815 | 42  | H      | 1.172683 | 5.329958 | 0.117722 |
| 3   | C      | 0.328953 | 3.427526 | 0.578087 | 43  | H      | -0.54938 | 3.867045 | 1.032919 |
| 4   | C      | 0.456186 | 2.030633 | 0.473446 | 44  | H      | 3.396357 | 1.942658 | -1.24448 |
| 5   | C      | 1.617205 | 1.479331 | -0.11192 | 45  | H      | -0.99527 | -2.54147 | 1.914253 |
| 6   | C      | 2.559633 | 2.351575 | -0.69322 | 46  | H      | -2.46972 | -2.93737 | 1.05257  |
| 7   | N      | -0.55342 | 1.196218 | 0.913712 | 47  | H      | -0.53632 | -3.99981 | -0.10398 |
| 8   | C      | -0.56995 | -0.12716 | 0.554508 | 48  | H      | -1.23903 | -2.7494  | -1.12642 |
| 9   | C      | 0.586828 | -0.72532 | 0.036682 | 49  | H      | 1.315273 | -2.66105 | 0.523794 |
| 10  | C      | 1.744969 | 0.045892 | -0.14927 | 50  | H      | 1.12583  | -2.39316 | -1.20209 |
| 11  | C      | -1.77084 | -0.92274 | 0.737687 | 51  | H      | -3.00554 | 0.664229 | 0.180097 |
| 12  | C      | -1.53194 | -2.38779 | 0.968841 | 52  | H      | -4.2072  | -2.13739 | 0.646094 |
| 13  | C      | -0.69573 | -2.92065 | -0.19065 | 53  | H      | -7.67008 | 2.812125 | -0.74747 |
| 14  | C      | 0.651849 | -2.20986 | -0.22914 | 54  | H      | -10.0395 | 2.393438 | -1.30746 |
| 15  | C      | -2.99806 | -0.37738 | 0.477364 | 55  | H      | -10.9627 | 0.10025  | -1.29681 |
| 16  | C      | -4.23707 | -1.06979 | 0.456326 | 56  | H      | -9.50383 | -1.8324  | -0.7138  |
| 17  | C      | -5.48931 | -0.60052 | 0.158001 | 57  | H      | -6.18883 | -2.91115 | 1.613121 |
| 18  | N      | -5.92079 | 0.680694 | -0.02945 | 58  | H      | -7.1819  | -1.52842 | 2.107528 |
| 19  | C      | -7.27122 | 0.707641 | -0.39708 | 59  | H      | -7.90635 | -2.86093 | 1.192482 |
| 20  | C      | -7.7775  | -0.59056 | -0.3994  | 60  | H      | -5.59182 | -3.23477 | -0.85851 |
| 21  | C      | -6.67887 | -1.54502 | -0.01475 | 61  | H      | -7.30761 | -3.18432 | -1.28324 |
| 22  | C      | -8.06225 | 1.801068 | -0.72479 | 62  | H      | -6.17028 | -2.07469 | -2.06605 |
| 23  | C      | -9.39944 | 1.555956 | -1.04568 | 63  | H      | -4.49705 | 2.131785 | -0.6011  |
| 24  | C      | -9.92028 | 0.264276 | -1.0417  | 64  | H      | -4.57892 | 1.752851 | 1.142493 |
| 25  | C      | -9.10214 | -0.82268 | -0.71575 | 65  | H      | -5.84814 | 2.710104 | 0.385708 |
| 26  | C      | -7.00563 | -2.25185 | 1.307843 | 66  | H      | -0.90445 | 2.292976 | 2.650897 |
| 27  | C      | -6.41756 | -2.56954 | -1.12383 | 67  | H      | -2.22522 | 2.395086 | 1.470079 |
| 28  | C      | -5.16215 | 1.880073 | 0.229174 | 68  | H      | -1.98337 | 0.910588 | 2.408872 |
| 29  | C      | -1.47965 | 1.733689 | 1.913082 | 69  | H      | 2.858645 | -1.55254 | -0.59691 |
| 30  | N      | 2.914651 | -0.55794 | -0.43668 | 70  | H      | 4.80496  | 0.169086 | -1.03725 |
| 31  | C      | 4.255809 | -0.08777 | -0.12598 | 71  | H      | 4.192033 | 0.802982 | 0.499338 |
| 32  | C      | 5.020464 | -1.17891 | 0.627155 | 72  | H      | 4.509012 | -1.42127 | 1.561047 |
| 33  | N      | 6.367687 | -0.77048 | 0.927707 | 73  | H      | 5.064965 | -2.09067 | 0.024872 |
| 34  | C      | 7.343881 | -0.83236 | -0.01537 | 74  | H      | 6.560968 | -0.27167 | 1.78067  |
| 35  | O      | 8.476566 | -0.30354 | 0.475094 | 75  | H      | 11.143   | -1.62266 | -1.15749 |
| 36  | O      | 7.191504 | -1.31199 | -1.12516 | 76  | H      | 9.465429 | -2.16171 | -1.34953 |
| 37  | C      | 9.699283 | -0.25707 | -0.33232 | 77  | H      | 10.26072 | -2.26784 | 0.234297 |
| 38  | C      | 10.1633  | -1.66755 | -0.67461 | 78  | H      | 11.6619  | 0.512499 | 0.120761 |
| 39  | C      | 10.68812 | 0.415618 | 0.606477 | 79  | H      | 10.34076 | 1.41426  | 0.883673 |
| 40  | C      | 9.484431 | 0.59338  | -1.57851 | 80  | H      | 10.81576 | -0.17169 | 1.519444 |

| Row | Symbol | X        | Y        | Z        | Row | Symbol | X        | Y        | Z        |
|-----|--------|----------|----------|----------|-----|--------|----------|----------|----------|
| 81  | H      | 9.095956 | 1.578559 | -1.3055  | 83  | H      | 8.787283 | 0.118961 | -2.26793 |
| 82  | H      | 10.4392  | 0.736176 | -2.09139 |     |        |          |          |          |

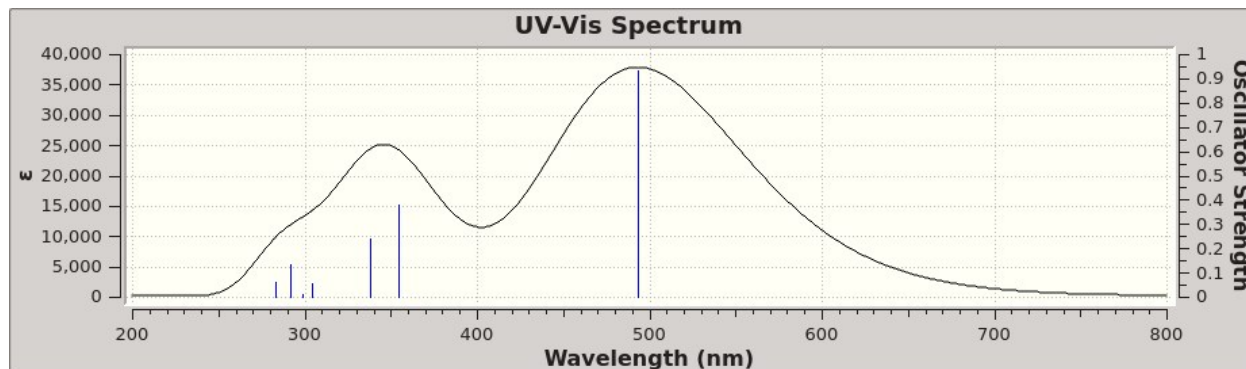

**Figure S37.** Calculated UV-Vis spectrum for probe **B** in water.

**Table S5.** Excitation energies and oscillator strengths listing for probe **B** in water.

| Excited State | Nature | E (eV) | $\lambda$ (nm) | $f$    | Orbital transitions                              | Normalized coefficient                      |
|---------------|--------|--------|----------------|--------|--------------------------------------------------|---------------------------------------------|
| 1:            | A      | 2.5117 | 493.63         | 0.9308 | 145 ->146                                        | 0.70485                                     |
| 2:            | A      | 3.4974 | 354.50         | 0.3804 | 145 ->147                                        | 0.69690                                     |
| 3:            | A      | 3.6642 | 338.37         | 0.2396 | 144 ->146                                        | 0.69056                                     |
| 4:            | A      | 4.0789 | 303.96         | 0.0578 | 143 ->146<br>144 ->147                           | 0.68051<br>-0.12591                         |
| 5:            | A      | 4.1533 | 298.52         | 0.0113 | 142 ->146<br>145 ->148<br>145 ->149              | -0.11620<br>0.52148<br>-0.43846             |
| 6:            | A      | 4.2457 | 292.02         | 0.1351 | 142 ->146<br>144 ->147<br>145 ->148<br>145 ->149 | 0.14668<br>0.13023<br>0.43757<br>0.50100    |
| 7:            | A      | 4.3797 | 283.09         | 0.0632 | 140 ->146<br>141 ->146<br>143 ->146<br>144 ->147 | -0.22798<br>0.53287<br>-0.10832<br>-0.34612 |



|            |                                                                                      |
|------------|--------------------------------------------------------------------------------------|
| 145-HOMO   | 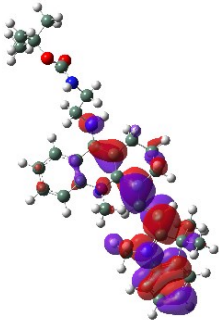   |
| 146-LUMO   |    |
| 147-LUMO+1 |  |

**Figure S38.** Drawings of selected molecular orbitals for probe **B** listed in Table S4.

Theoretical calculations for probe BH<sup>+</sup>.

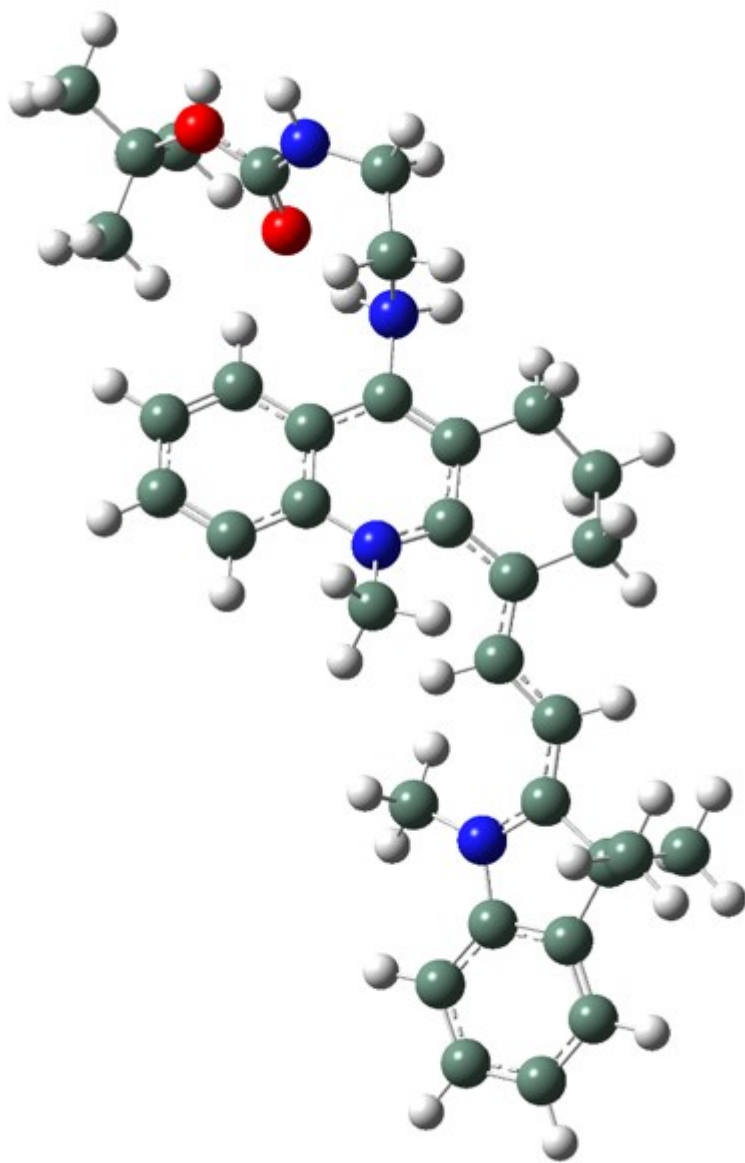

**Figure S39.** GaussView representation of probe BH<sup>+</sup>.

**Table S6.** Calculated atomic coordinates for probe **BH<sup>+</sup>** in water.

| Row | Symbol | X        | Y        | Z        | Row | Symbol | X        | Y        | Z        |
|-----|--------|----------|----------|----------|-----|--------|----------|----------|----------|
| 1   | C      | 3.250393 | 2.511813 | 1.356922 | 41  | H      | 4.146021 | 3.12347  | 1.346938 |
| 2   | C      | 2.073603 | 2.992191 | 1.939744 | 42  | H      | 2.051234 | 3.982693 | 2.382115 |
| 3   | C      | 0.924593 | 2.225053 | 1.945278 | 43  | H      | 0.019576 | 2.631884 | 2.37698  |
| 4   | C      | 0.927088 | 0.950137 | 1.360058 | 44  | H      | 4.180959 | 0.910226 | 0.31826  |
| 5   | C      | 2.114756 | 0.454623 | 0.777811 | 45  | H      | -1.55706 | -3.62395 | 0.764434 |
| 6   | C      | 3.26787  | 1.257696 | 0.784366 | 46  | H      | -2.56663 | -3.21762 | -0.61312 |
| 7   | N      | -0.2147  | 0.164013 | 1.358048 | 47  | H      | -0.48534 | -4.37268 | -1.3501  |
| 8   | C      | -0.31392 | -0.96841 | 0.587329 | 48  | H      | -0.59012 | -2.73854 | -2.00156 |
| 9   | C      | 0.911896 | -1.58025 | 0.131463 | 49  | H      | 1.050751 | -3.67871 | 0.397395 |
| 10  | C      | 2.066117 | -0.86986 | 0.249288 | 50  | H      | 1.654564 | -3.15273 | -1.16191 |
| 11  | C      | -1.56692 | -1.5333  | 0.258897 | 51  | H      | -2.51091 | 0.354703 | 0.247863 |
| 12  | C      | -1.61701 | -2.98777 | -0.128   | 52  | H      | -4.20305 | -2.19368 | 0.006443 |
| 13  | C      | -0.47324 | -3.31401 | -1.07688 | 53  | H      | -6.38186 | 3.508139 | -1.06377 |
| 14  | C      | 0.861826 | -2.97931 | -0.42751 | 54  | H      | -8.83815 | 3.806374 | -1.03924 |
| 15  | C      | -2.68694 | -0.70912 | 0.151668 | 55  | H      | -10.3421 | 1.901297 | -0.5856  |
| 16  | C      | -3.99361 | -1.13256 | -0.07294 | 56  | H      | -9.40905 | -0.36169 | -0.14232 |
| 17  | C      | -5.12336 | -0.34533 | -0.27427 | 57  | H      | -7.82705 | -2.31447 | -1.14014 |
| 18  | N      | -5.20294 | 0.952651 | -0.60781 | 58  | H      | -6.6142  | -1.58616 | -2.20552 |
| 19  | C      | -6.54222 | 1.387093 | -0.63241 | 59  | H      | -6.14646 | -2.85402 | -1.05602 |
| 20  | C      | -7.37488 | 0.306352 | -0.36222 | 60  | H      | -7.7764  | -1.82307 | 1.383749 |
| 21  | C      | -6.5279  | -0.9134  | -0.12958 | 61  | H      | -6.08863 | -2.34568 | 1.453845 |
| 22  | C      | -7.03251 | 2.661214 | -0.87647 | 62  | H      | -6.5429  | -0.73702 | 2.043878 |
| 23  | C      | -8.41865 | 2.82218  | -0.85508 | 63  | H      | -3.69115 | 2.343128 | -0.1402  |
| 24  | C      | -9.26771 | 1.747161 | -0.59704 | 64  | H      | -3.33877 | 1.228207 | -1.49047 |
| 25  | C      | -8.74685 | 0.474636 | -0.34677 | 65  | H      | -4.48372 | 2.551482 | -1.71355 |
| 26  | C      | -6.7881  | -1.98187 | -1.20242 | 66  | H      | -0.71909 | 0.687467 | 3.309912 |
| 27  | C      | -6.74193 | -1.48817 | 1.276173 | 67  | H      | -1.8341  | 1.348819 | 2.096204 |
| 28  | C      | -4.11164 | 1.818222 | -1.0005  | 68  | H      | -1.87988 | -0.37725 | 2.496131 |
| 29  | C      | -1.23025 | 0.48344  | 2.368985 | 69  | H      | 3.154295 | -2.23157 | -0.80796 |
| 30  | N      | 3.329164 | -1.48565 | -0.13469 | 70  | H      | 4.000253 | -0.84414 | -0.62859 |
| 31  | C      | 4.081555 | -2.06611 | 1.038861 | 71  | H      | 4.120931 | -1.29523 | 1.807468 |
| 32  | C      | 5.478317 | -2.51523 | 0.633424 | 72  | H      | 3.490341 | -2.90292 | 1.408554 |
| 33  | N      | 6.465494 | -1.45614 | 0.592915 | 73  | H      | 5.817088 | -3.23297 | 1.379799 |
| 34  | C      | 6.457047 | -0.4854  | -0.34317 | 74  | H      | 5.450847 | -3.05192 | -0.32134 |
| 35  | O      | 7.580062 | 0.210978 | -0.328   | 75  | H      | 7.300279 | -1.55356 | 1.148544 |
| 36  | O      | 5.498933 | -0.27764 | -1.09709 | 76  | H      | 8.009247 | 1.919926 | -3.2309  |
| 37  | C      | 7.756064 | 1.421209 | -1.15974 | 77  | H      | 6.775338 | 0.68098  | -2.95014 |
| 38  | C      | 7.753258 | 1.041564 | -2.63302 | 78  | H      | 8.499088 | 0.267356 | -2.83107 |
| 39  | C      | 9.128871 | 1.905841 | -0.72625 | 79  | H      | 9.402334 | 2.801133 | -1.28866 |
| 40  | C      | 6.689637 | 2.455778 | -0.82592 | 80  | H      | 9.135522 | 2.151913 | 0.338432 |

| Row | Symbol | X        | Y        | Z        | Row | Symbol | X        | Y       | Z        |
|-----|--------|----------|----------|----------|-----|--------|----------|---------|----------|
| 81  | H      | 9.885489 | 1.139375 | -0.91054 | 83  | H      | 6.958355 | 3.4077  | -1.29012 |
| 82  | H      | 6.632658 | 2.613212 | 0.254655 | 84  | H      | 5.708713 | 2.16253 | -1.19776 |

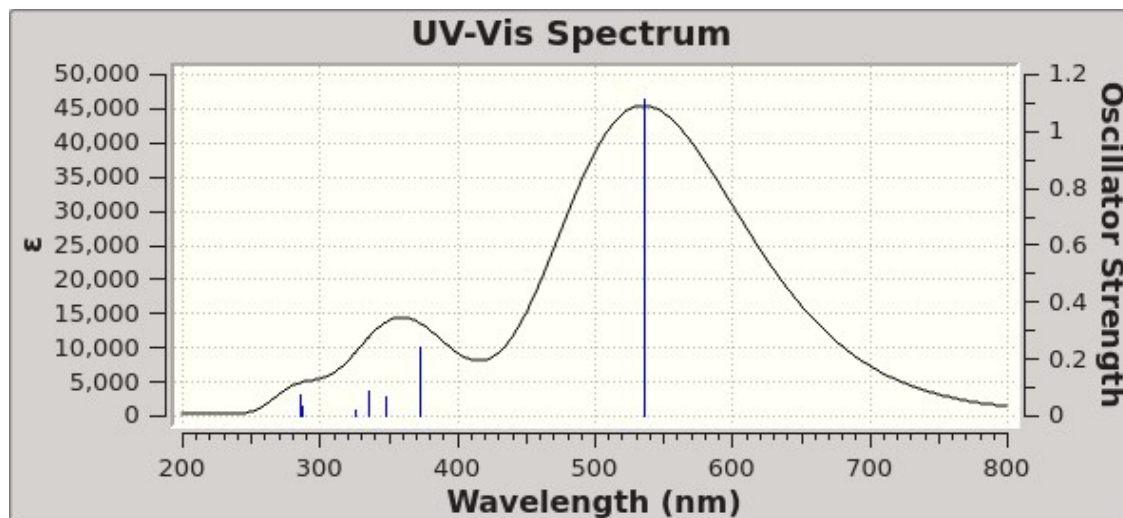

**Figure S40.** Calculated UV-Vis spectrum for probe **BH<sup>+</sup>** in water.

**Table S7.** Excitation energies and oscillator strengths listing for probe **BH<sup>+</sup>** in water.

| Excited State | Nature | E (eV) | $\lambda$ (nm) | $f$    | Orbital transitions                              | Normalized coefficient                     |
|---------------|--------|--------|----------------|--------|--------------------------------------------------|--------------------------------------------|
| 1:            | A      | 2.3144 | 535.71         | 1.1162 | 145 ->146                                        | 0.70790                                    |
| 2:            | A      | 3.3298 | 372.35         | 0.2386 | 144 ->146<br>145 ->147                           | 0.12370<br>0.68292                         |
| 3:            | A      | 3.5613 | 348.14         | 0.0701 | 144 ->146<br>145 ->147                           | 0.68429<br>-0.11099                        |
| 4:            | A      | 3.6954 | 335.51         | 0.0848 | 142 ->146                                        | 0.68871                                    |
| 5:            | A      | 3.8006 | 326.22         | 0.0193 | 143 ->146                                        | 0.68892                                    |
| 6:            | A      | 4.3217 | 286.88         | 0.0313 | 140 ->146<br>142 ->147<br>145 ->148              | 0.63454<br>-0.15780<br>-0.21125            |
| 7:            | A      | 4.3435 | 285.45         | 0.0720 | 140 ->146<br>141 ->146<br>142 ->147<br>145 ->148 | 0.15066<br>-0.10333<br>-0.19059<br>0.62862 |

|            |                                                                                                                                                                                                                                                                                                                         |
|------------|-------------------------------------------------------------------------------------------------------------------------------------------------------------------------------------------------------------------------------------------------------------------------------------------------------------------------|
| 144-HOMO-1 | 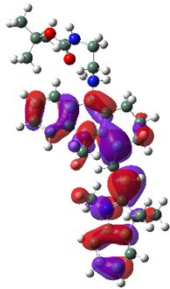 A 3D ball-and-stick model of a molecule with red, blue, and grey atoms. Overlaid are several red and purple lobes representing the 144-HOMO-1 molecular orbital, primarily located on the right side of the molecule.                 |
| 145-HOMO   |  A 3D ball-and-stick model of a molecule with red, blue, and grey atoms. Overlaid are several red and purple lobes representing the 145-HOMO molecular orbital, distributed across the central and right portions of the molecule.     |
| 146-LUMO   |  A 3D ball-and-stick model of a molecule with red, blue, and grey atoms. Overlaid are several red and purple lobes representing the 146-LUMO molecular orbital, primarily located on the left side of the molecule.                  |
| 147-LUMO+1 |  A 3D ball-and-stick model of a molecule with red, blue, and grey atoms. Overlaid are several red and purple lobes representing the 147-LUMO+1 molecular orbital, distributed across the central and right portions of the molecule. |

**Figure S41.** Drawings of selected molecular orbitals for probe **BH<sup>+</sup>** listed in Table S6.

Theoretical calculations for probe C.

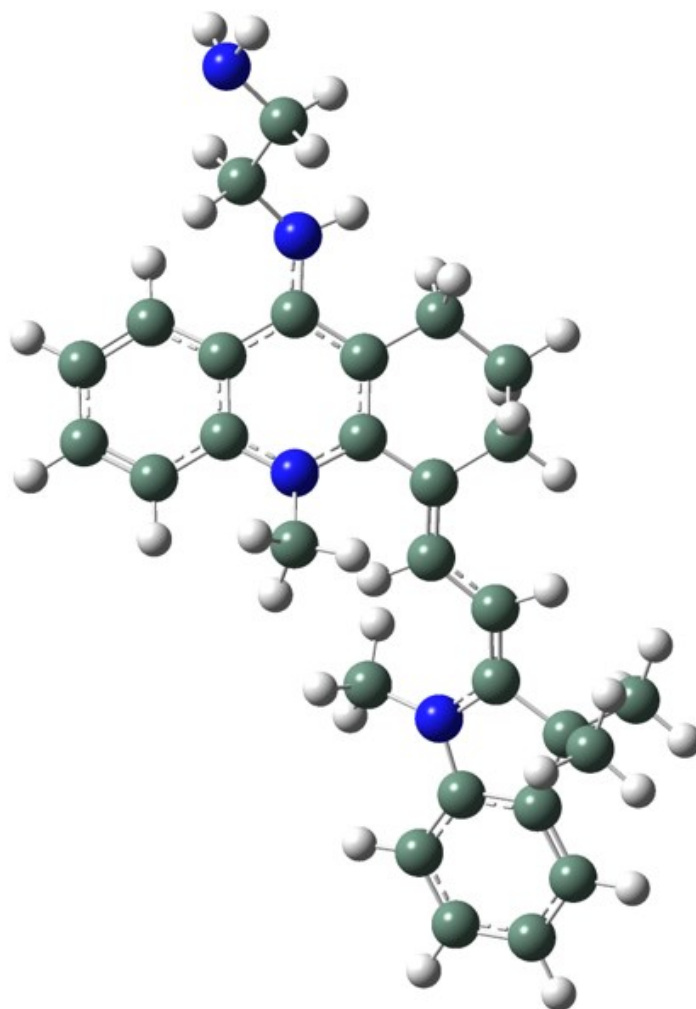

**Figure S42.** GaussView representation of probe C.

**Table S8.** Calculated atomic coordinates for probe C in water.

| Row | Symbol | X        | Y        | Z        | Row | Symbol | X        | Y        | Z        |
|-----|--------|----------|----------|----------|-----|--------|----------|----------|----------|
| 1   | C      | 4.589212 | 3.45938  | -0.40435 | 35  | H      | 3.407252 | 4.995769 | 0.547285 |
| 2   | C      | 3.501299 | 3.934857 | 0.337957 | 36  | H      | 1.653958 | 3.47104  | 1.289056 |
| 3   | C      | 2.516302 | 3.072033 | 0.770495 | 37  | H      | 5.525003 | 1.755667 | -1.26442 |
| 4   | C      | 2.603266 | 1.697563 | 0.485133 | 38  | H      | 0.940847 | -3.01396 | 1.275653 |
| 5   | C      | 3.743111 | 1.194945 | -0.1812  | 39  | H      | -0.52767 | -3.17518 | 0.32343  |
| 6   | C      | 4.703411 | 2.110456 | -0.65665 | 40  | H      | 1.386765 | -4.14482 | -0.93735 |
| 7   | N      | 1.573814 | 0.842665 | 0.828186 | 41  | H      | 0.76309  | -2.71937 | -1.76296 |
| 8   | C      | 1.511362 | -0.41918 | 0.290988 | 42  | H      | 3.279317 | -2.99625 | -0.0732  |
| 9   | C      | 2.646038 | -0.97898 | -0.30851 | 43  | H      | 3.147342 | -2.48801 | -1.75007 |
| 10  | C      | 3.830383 | -0.22694 | -0.39848 | 44  | H      | -0.88709 | 0.527589 | 0.0943   |
| 11  | C      | 0.279509 | -1.18168 | 0.365903 | 45  | H      | -2.25923 | -2.19111 | 0.562291 |
| 12  | C      | 0.440871 | -2.67503 | 0.358741 | 46  | H      | -5.30231 | 2.943287 | -1.12059 |
| 13  | C      | 1.278542 | -3.05878 | -0.8577  | 47  | H      | -7.76587 | 2.900497 | -0.93034 |
| 14  | C      | 2.656988 | -2.41562 | -0.77074 | 48  | H      | -8.94387 | 0.882615 | -0.1243  |
| 15  | C      | -0.92356 | -0.54641 | 0.228095 | 49  | H      | -7.65263 | -1.15129 | 0.507935 |
| 16  | C      | -2.20763 | -1.15092 | 0.257824 | 50  | H      | -5.88052 | -2.9826  | -0.41037 |
| 17  | C      | -3.42957 | -0.57336 | 0.034235 | 51  | H      | -4.85265 | -2.21732 | -1.63334 |
| 18  | N      | -3.72958 | 0.66106  | -0.46572 | 52  | H      | -4.13324 | -3.26401 | -0.39659 |
| 19  | C      | -5.1088  | 0.894821 | -0.42932 | 53  | H      | -5.77165 | -2.18664 | 2.028411 |
| 20  | C      | -5.76105 | -0.24429 | 0.03861  | 54  | H      | -4.02724 | -2.47381 | 2.040125 |
| 21  | C      | -4.73591 | -1.30372 | 0.34404  | 55  | H      | -4.66393 | -0.87999 | 2.479403 |
| 22  | C      | -5.80486 | 2.044002 | -0.78101 | 56  | H      | -2.35205 | 2.259428 | -0.342   |
| 23  | C      | -7.19674 | 2.014514 | -0.66428 | 57  | H      | -2.02602 | 1.036353 | -1.59867 |
| 24  | C      | -7.86149 | 0.878827 | -0.20841 | 58  | H      | -3.34001 | 2.189416 | -1.81159 |
| 25  | C      | -7.13792 | -0.2644  | 0.148283 | 59  | H      | 1.291766 | 1.710485 | 2.702276 |
| 26  | C      | -4.90734 | -2.51498 | -0.5834  | 60  | H      | -0.06153 | 1.987096 | 1.585332 |
| 27  | C      | -4.79967 | -1.73479 | 1.812555 | 61  | H      | 0.176807 | 0.391379 | 2.314058 |
| 28  | C      | -2.80676 | 1.588518 | -1.07611 | 62  | H      | 4.894091 | -1.80513 | -1.00191 |
| 29  | C      | 0.684914 | 1.263057 | 1.9151   | 63  | H      | 6.840249 | -0.03641 | -1.34798 |
| 30  | N      | 4.977827 | -0.83035 | -0.75487 | 64  | H      | 6.328507 | 0.375407 | 0.29372  |
| 31  | C      | 6.341626 | -0.42115 | -0.45021 | 65  | H      | 6.654072 | -1.92833 | 1.040415 |
| 32  | C      | 7.124817 | -1.60401 | 0.107192 | 66  | H      | 7.062954 | -2.45192 | -0.59498 |
| 33  | N      | 8.487884 | -1.17609 | 0.392795 | 67  | H      | 8.96314  | -1.89272 | 0.929288 |
| 34  | H      | 5.333182 | 4.148853 | -0.78915 | 68  | H      | 9.007367 | -1.08948 | -0.47462 |

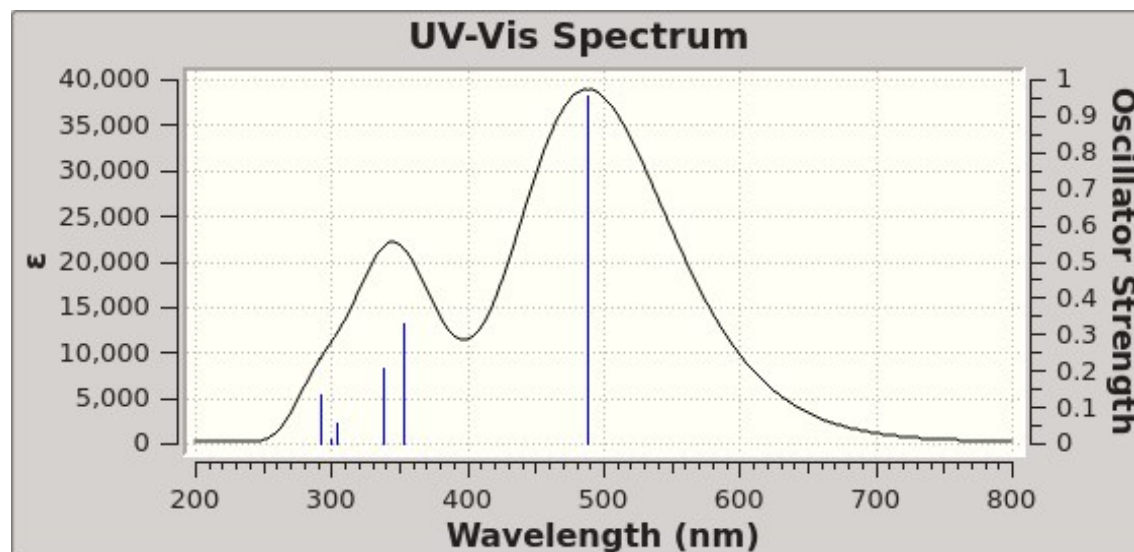

**Figure S43.** Calculated UV-Vis spectrum for probe C in water.

**Table S9.** Excitation energies and oscillator strengths listing for probe C in water.

| Excited State | Nature | E (eV) | $\lambda$ (nm) | $f$    | Orbital transitions                              | Normalized coefficient                     |
|---------------|--------|--------|----------------|--------|--------------------------------------------------|--------------------------------------------|
| 1:            | A      | 2.5374 | 488.62         | 0.9565 | 118 ->119                                        | 0.70487                                    |
| 2:            | A      | 3.5057 | 353.66         | 0.3320 | 118 ->120                                        | 0.69500                                    |
| 3:            | A      | 3.6673 | 338.08         | 0.2092 | 117 ->119                                        | 0.68850                                    |
| 4:            | A      | 4.0878 | 303.30         | 0.0551 | 116 ->119<br>117 ->120                           | 0.67201<br>-0.12887                        |
| 5:            | A      | 4.1365 | 299.73         | 0.0017 | 115 ->119<br>116 ->119<br>118 ->121<br>118 ->122 | 0.65240<br>-0.10254<br>0.18654<br>-0.13071 |
| 6:            | A      | 4.1454 | 299.09         | 0.0102 | 114 ->119<br>115 ->119<br>118 ->121<br>118 ->122 | 0.10201<br>-0.23942<br>0.50229<br>-0.40135 |
| 7:            | A      | 4.2430 | 292.21         | 0.1321 | 114 ->119<br>117 ->120<br>118 ->121<br>118 ->122 | -0.13275<br>0.14244<br>0.41532<br>0.51972  |



|            |                                                                                                                                                                                                                                                                                                                                                                                |
|------------|--------------------------------------------------------------------------------------------------------------------------------------------------------------------------------------------------------------------------------------------------------------------------------------------------------------------------------------------------------------------------------|
| 118-HOMO   | 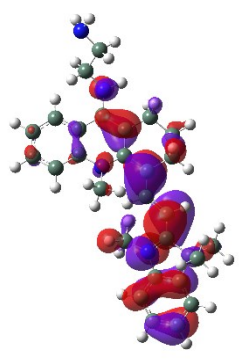 A 3D ball-and-stick model of a molecule with overlaid isosurface plots of the Highest Occupied Molecular Orbital (HOMO). The orbitals are shown in red and purple, indicating positive and negative phases, respectively. The molecule has a complex, branched structure.                   |
| 119-LUMO   |  A 3D ball-and-stick model of the same molecule with overlaid isosurface plots of the Lowest Unoccupied Molecular Orbital (LUMO). The orbitals are shown in red and purple, indicating positive and negative phases, respectively. The distribution of orbitals is different from the HOMO. |
| 120-LUMO+1 |  A 3D ball-and-stick model of the same molecule with overlaid isosurface plots of the LUMO+1 orbital. The orbitals are shown in red and purple, indicating positive and negative phases, respectively. The distribution of orbitals is distinct from the LUMO.                             |

**Figure S44.** Drawings of selected molecular orbitals for probe **C** listed in Table S8.

Theoretical calculations for probe  $\text{CH}^+$ .

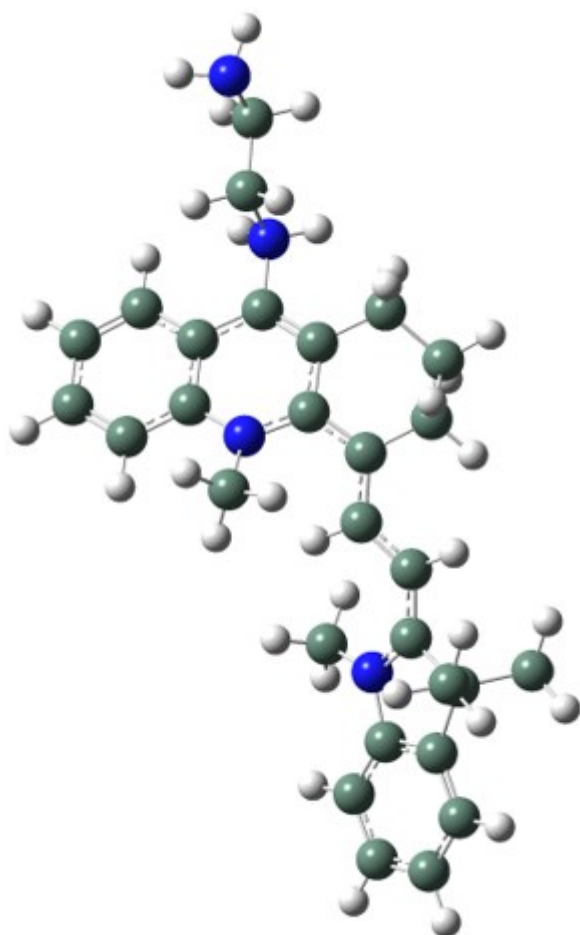

**Figure S45.** GaussView representation of probe  $\text{CH}^+$ .

**Table S10.** Calculated atomic coordinates for probe CH<sup>+</sup> in water.

| Row | Symbol | X        | Y        | Z        | Row | Symbol | X        | Y        | Z        |
|-----|--------|----------|----------|----------|-----|--------|----------|----------|----------|
| 1   | C      | 4.5303   | 3.583013 | -0.1971  | 36  | H      | 1.456662 | 3.503215 | 1.230604 |
| 2   | C      | 3.365981 | 4.021666 | 0.440296 | 37  | H      | 5.589668 | 1.940957 | -1.01028 |
| 3   | C      | 2.356987 | 3.13316  | 0.758031 | 38  | H      | 0.705356 | -3.10284 | 1.120618 |
| 4   | C      | 2.487956 | 1.774631 | 0.435129 | 39  | H      | -0.5246  | -3.13461 | -0.13133 |
| 5   | C      | 3.659572 | 1.323988 | -0.21309 | 40  | H      | 1.601665 | -4.14136 | -0.9533  |
| 6   | C      | 4.672987 | 2.249407 | -0.51777 | 41  | H      | 1.154714 | -2.71181 | -1.88234 |
| 7   | N      | 1.491652 | 0.865736 | 0.757919 | 42  | H      | 3.219377 | -2.89771 | 0.361355 |
| 8   | C      | 1.476428 | -0.41014 | 0.2483   | 43  | H      | 3.52803  | -2.64337 | -1.34401 |
| 9   | C      | 2.714143 | -0.94185 | -0.27259 | 44  | H      | -0.92222 | 0.517439 | -0.01138 |
| 10  | C      | 3.739869 | -0.07534 | -0.47952 | 45  | H      | -2.2173  | -2.21517 | 0.507245 |
| 11  | C      | 0.298836 | -1.18806 | 0.229722 | 46  | H      | -5.34708 | 2.788473 | -1.38257 |
| 12  | C      | 0.430786 | -2.68568 | 0.143262 | 47  | H      | -7.79978 | 2.782405 | -1.05634 |
| 13  | C      | 1.479745 | -3.05643 | -0.89485 | 48  | H      | -8.93312 | 0.861824 | 0.003798 |
| 14  | C      | 2.81692  | -2.42085 | -0.54198 | 49  | H      | -7.62169 | -1.11055 | 0.765534 |
| 15  | C      | -0.94163 | -0.55551 | 0.1308   | 50  | H      | -5.89142 | -3.03023 | -0.03881 |
| 16  | C      | -2.18276 | -1.1794  | 0.187945 | 51  | H      | -4.93455 | -2.41605 | -1.3966  |
| 17  | C      | -3.4357  | -0.60193 | -0.00237 | 52  | H      | -4.15031 | -3.32742 | -0.09169 |
| 18  | N      | -3.7485  | 0.566234 | -0.583   | 53  | H      | -5.62114 | -1.98238 | 2.296976 |
| 19  | C      | -5.13215 | 0.817364 | -0.49945 | 54  | H      | -3.87802 | -2.27124 | 2.221304 |
| 20  | C      | -5.75343 | -0.26712 | 0.110455 | 55  | H      | -4.49293 | -0.63753 | 2.53127  |
| 21  | C      | -4.71043 | -1.29034 | 0.462043 | 56  | H      | -2.42117 | 2.201675 | -0.6508  |
| 22  | C      | -5.83499 | 1.933206 | -0.92851 | 57  | H      | -2.06315 | 0.855589 | -1.7686  |
| 23  | C      | -7.2171  | 1.924542 | -0.73529 | 58  | H      | -3.41432 | 1.941502 | -2.09759 |
| 24  | C      | -7.85678 | 0.841026 | -0.1351  | 59  | H      | 1.151882 | 1.727205 | 2.624187 |
| 25  | C      | -7.12336 | -0.26818 | 0.294679 | 60  | H      | -0.19466 | 1.959484 | 1.489205 |
| 26  | C      | -4.92901 | -2.5955  | -0.31918 | 61  | H      | 0.086243 | 0.369564 | 2.219987 |
| 27  | C      | -4.66793 | -1.55893 | 1.971387 | 62  | H      | 5.412837 | 0.064312 | -1.66416 |
| 28  | C      | -2.85444 | 1.444526 | -1.30761 | 63  | H      | 4.86483  | -1.44835 | -1.49909 |
| 29  | C      | 0.569164 | 1.26055  | 1.829998 | 64  | H      | 6.123154 | 0.098505 | 0.670673 |
| 30  | N      | 5.017643 | -0.58314 | -0.97824 | 65  | H      | 5.566243 | -1.57845 | 0.790964 |
| 31  | C      | 6.015444 | -0.84094 | 0.12772  | 66  | H      | 7.188359 | -2.29158 | -0.93728 |
| 32  | C      | 7.340056 | -1.33346 | -0.43146 | 67  | H      | 7.719036 | -0.62602 | -1.18456 |
| 33  | N      | 8.233177 | -1.53975 | 0.697547 | 68  | H      | 9.004916 | -2.13402 | 0.420338 |
| 34  | H      | 5.318708 | 4.285603 | -0.44315 | 69  | H      | 8.64209  | -0.65715 | 0.983626 |
| 35  | H      | 3.243091 | 5.071944 | 0.682991 |     |        |          |          |          |

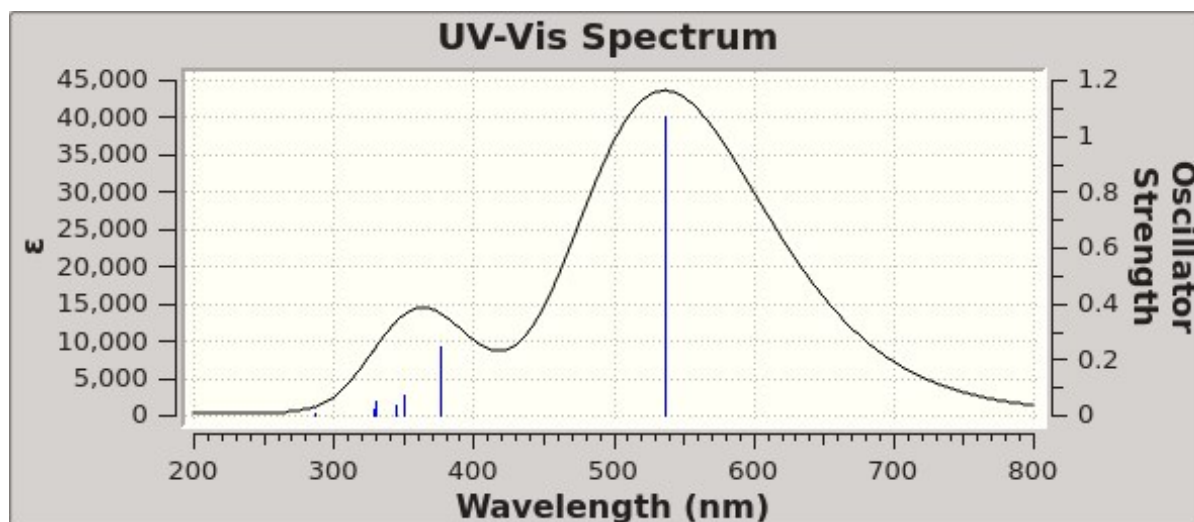

**Figure S46.** Calculated UV-Vis spectrum for probe  $\text{CH}^+$  in water.

**Table S11.** Excitation energies and oscillator strengths listing for probe  $\text{CH}^+$  in water.

| Excited State | Nature | E (eV) | $\lambda$ (nm) | $f$    | Orbital transitions    | Normalized coefficient |
|---------------|--------|--------|----------------|--------|------------------------|------------------------|
| 1:            | A      | 2.3097 | 536.79         | 1.0710 | 118 ->119              | 0.70787                |
| 2:            | A      | 3.2980 | 375.94         | 0.2460 | 117 ->119<br>118 ->120 | 0.11251<br>0.68550     |
| 3:            | A      | 3.5397 | 350.27         | 0.0703 | 117 ->119<br>118 ->120 | 0.68503<br>-0.10110    |
| 4:            | A      | 3.6023 | 344.18         | 0.0362 | 114 ->119<br>116 ->119 | -0.14456<br>0.68809    |
| 5:            | A      | 3.7529 | 330.37         | 0.0482 | 114 ->119<br>116 ->119 | 0.67494<br>0.14909     |
| 6:<br>0.69028 | A      | 3.7690 | 328.96         | 0.0194 | 115 ->119              |                        |
| 7:<br>0.52985 | A      | 4.3204 | 286.97         | 0.0108 | 113 ->119<br>118 ->121 |                        |

|            |                                                                                     |
|------------|-------------------------------------------------------------------------------------|
| 117-HOMO-1 | 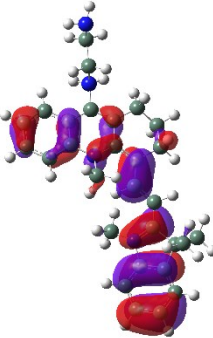   |
| 118-HOMO   |    |
| 119-LUMO   |   |
| 120-LUMO+1 |  |

**Figure S47.** Drawings of selected molecular orbitals for probe  $\text{CH}^+$  listed in Table S10.

Theoretical calculations for probe D.

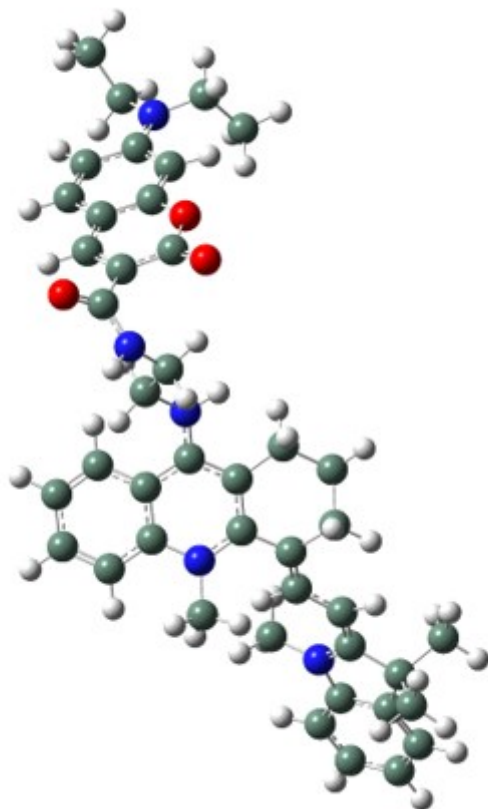

**Figure S48.** GaussView representation of probe **D**.

**Table S12.** Calculated atomic coordinates for probe **D** in water.

| Row | Symbol | X        | Y        | Z        | Row | Symbol | X        | Y        | Z        |
|-----|--------|----------|----------|----------|-----|--------|----------|----------|----------|
| 1   | C      | 0.274072 | 2.939838 | -3.51328 | 40  | O      | 6.037623 | -0.06932 | 1.81036  |
| 2   | C      | -1.05703 | 3.306912 | -3.74744 | 41  | C      | 5.590529 | 1.234206 | 1.960866 |
| 3   | C      | -2.02959 | 3.065498 | -2.79995 | 42  | O      | 5.201791 | 1.545784 | 3.064799 |
| 4   | C      | -1.69043 | 2.463026 | -1.57503 | 43  | C      | 7.211756 | -0.29111 | -1.64673 |
| 5   | C      | -0.33708 | 2.173905 | -1.29318 | 44  | C      | 7.601639 | -1.60411 | -1.68539 |
| 6   | C      | 0.622941 | 2.381901 | -2.30395 | 45  | C      | 7.467831 | -2.44879 | -0.54077 |
| 7   | N      | -2.66951 | 2.130041 | -0.65849 | 46  | C      | 6.925781 | -1.87931 | 0.633895 |
| 8   | C      | -2.38772 | 1.287167 | 0.386849 | 47  | C      | 9.815663 | -4.21173 | -2.02814 |
| 9   | C      | -1.05392 | 1.03405  | 0.738654 | 48  | C      | 8.318027 | -4.38327 | -1.80556 |
| 10  | C      | -0.01622 | 1.61098  | -0.00804 | 49  | N      | 7.850863 | -3.74821 | -0.58046 |
| 11  | C      | -3.46227 | 0.682503 | 1.149962 | 50  | C      | 7.812248 | -4.59653 | 0.602315 |
| 12  | C      | -3.12971 | 0.34197  | 2.574987 | 51  | C      | 6.456646 | -5.26136 | 0.810644 |
| 13  | C      | -1.87693 | -0.52889 | 2.577484 | 52  | H      | 1.024875 | 3.081357 | -4.28345 |
| 14  | C      | -0.70659 | 0.234792 | 1.970949 | 53  | H      | -1.33942 | 3.752658 | -4.69598 |
| 15  | C      | -4.60218 | 0.267715 | 0.51737  | 54  | H      | -3.06066 | 3.301725 | -3.02944 |
| 16  | C      | -5.72203 | -0.35938 | 1.122825 | 55  | H      | 1.644167 | 2.06124  | -2.14454 |
| 17  | C      | -6.83642 | -0.88767 | 0.52522  | 56  | H      | -2.94892 | 1.254554 | 3.158061 |
| 18  | N      | -7.08293 | -1.13183 | -0.79438 | 57  | H      | -3.95524 | -0.18261 | 3.057127 |
| 19  | C      | -8.39146 | -1.59133 | -0.98372 | 58  | H      | -1.61816 | -0.84845 | 3.591571 |
| 20  | C      | -9.01931 | -1.72724 | 0.252831 | 59  | H      | -2.07584 | -1.43533 | 1.995171 |
| 21  | C      | -8.05936 | -1.31444 | 1.336458 | 60  | H      | -0.29944 | 0.926485 | 2.723591 |
| 22  | C      | -9.04437 | -1.89001 | -2.17254 | 61  | H      | 0.099498 | -0.47373 | 1.740446 |
| 23  | C      | -10.36   | -2.35182 | -2.08576 | 62  | H      | -4.65333 | 0.446187 | -0.54943 |
| 24  | C      | -10.995  | -2.50286 | -0.85556 | 63  | H      | -5.75199 | -0.37901 | 2.20723  |
| 25  | C      | -10.3198 | -2.18692 | 0.328405 | 64  | H      | -8.57162 | -1.76198 | -3.14032 |
| 26  | C      | -7.71593 | -2.50211 | 2.246169 | 65  | H      | -10.8949 | -2.59108 | -3.00022 |
| 27  | C      | -8.61556 | -0.14774 | 2.158929 | 66  | H      | -12.0189 | -2.86159 | -0.81564 |
| 28  | C      | -6.12714 | -1.05947 | -1.87402 | 67  | H      | -10.8131 | -2.30003 | 1.290029 |
| 29  | C      | -3.94137 | 2.853309 | -0.74551 | 68  | H      | -8.61667 | -2.85207 | 2.757763 |
| 30  | N      | 1.251582 | 1.550408 | 0.447255 | 69  | H      | -7.30504 | -3.33404 | 1.669083 |
| 31  | C      | 2.331381 | 2.489954 | 0.193526 | 70  | H      | -6.98483 | -2.21527 | 3.006664 |
| 32  | C      | 2.920414 | 2.955644 | 1.527885 | 71  | H      | -9.53099 | -0.4543  | 2.67224  |
| 33  | N      | 4.044486 | 3.846147 | 1.338062 | 72  | H      | -7.89748 | 0.177213 | 2.916119 |
| 34  | C      | 5.266676 | 3.523566 | 0.843733 | 73  | H      | -8.85105 | 0.706789 | 1.520063 |
| 35  | O      | 6.029675 | 4.38276  | 0.415423 | 74  | H      | -6.07109 | -0.05625 | -2.30528 |
| 36  | C      | 5.658052 | 2.083067 | 0.791512 | 75  | H      | -5.14331 | -1.35676 | -1.51162 |
| 37  | C      | 6.230283 | 1.614608 | -0.35881 | 76  | H      | -6.41965 | -1.75799 | -2.65663 |
| 38  | C      | 6.668193 | 0.280706 | -0.47978 | 77  | H      | -3.72681 | 3.90409  | -0.93977 |
| 39  | C      | 6.545843 | -0.55512 | 0.646382 | 78  | H      | -4.58301 | 2.467091 | -1.53869 |

| <b>Row</b> | <b>Symbol</b> | <b>X</b> | <b>Y</b> | <b>Z</b> |
|------------|---------------|----------|----------|----------|
| 79         | H             | -4.46242 | 2.769534 | 0.202357 |
| 80         | H             | 1.384487 | 0.992173 | 1.277048 |
| 81         | H             | 3.118653 | 2.028064 | -0.41164 |
| 82         | H             | 1.944943 | 3.351376 | -0.35164 |
| 83         | H             | 2.160831 | 3.494073 | 2.098038 |
| 84         | H             | 3.22588  | 2.106283 | 2.140042 |
| 85         | H             | 3.842969 | 4.834612 | 1.284835 |
| 86         | H             | 6.335169 | 2.288533 | -1.2052  |
| 87         | H             | 7.32696  | 0.330423 | -2.53014 |
| 88         | H             | 8.030265 | -1.9911  | -2.60048 |
| 89         | H             | 6.779333 | -2.455   | 1.538042 |
| 90         | H             | 10.12855 | -4.71857 | -2.94525 |
| 91         | H             | 10.08801 | -3.1566  | -2.11372 |
| 92         | H             | 10.38479 | -4.63761 | -1.19703 |
| 93         | H             | 8.065305 | -5.44422 | -1.73329 |
| 94         | H             | 7.745008 | -4.00405 | -2.65469 |
| 95         | H             | 8.590694 | -5.35425 | 0.482013 |
| 96         | H             | 8.105031 | -4.01147 | 1.477519 |
| 97         | H             | 6.473722 | -5.89801 | 1.699552 |
| 98         | H             | 5.663488 | -4.52044 | 0.939574 |
| 99         | H             | 6.193818 | -5.88702 | -0.04696 |



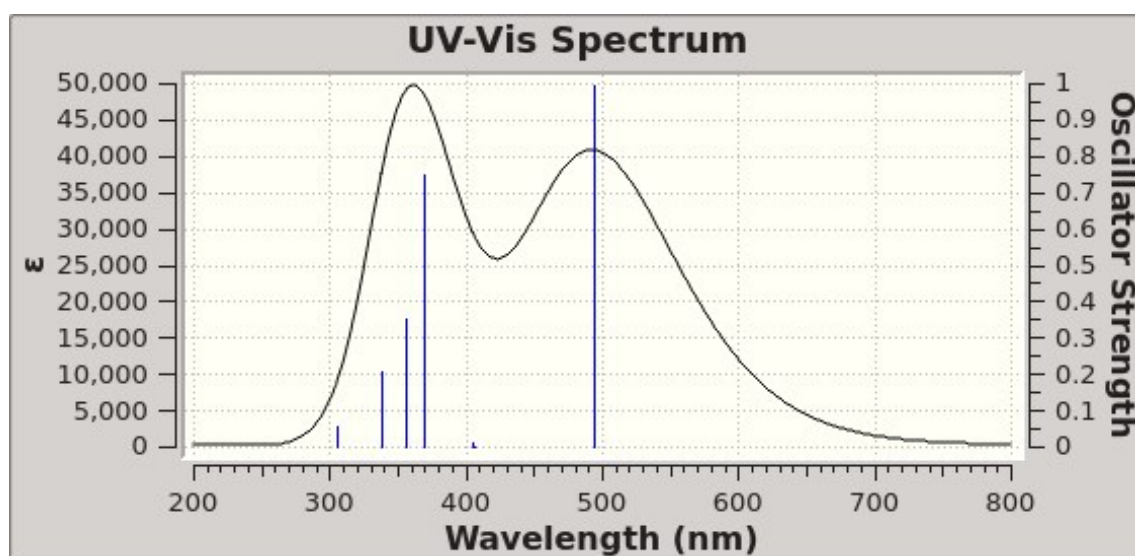

**Figure S49.** Calculated UV-Vis spectrum for probe **D** in water.

**Table S13.** Excitation energies and oscillator strengths listing for probe **D** in water.

| Excited State        | Nature | E (eV) | $\lambda$ (nm) | $f$    | Orbital transitions | Normalized coefficient |
|----------------------|--------|--------|----------------|--------|---------------------|------------------------|
| 1:<br>0.70438        | A      | 2.5073 | 494.49         | 0.9919 | 182 -> 183          |                        |
| 2:<br>0.70519        | A      | 3.0463 | 407.00         | 0.0027 | 182 -> 184          |                        |
| 3:<br>183<br>0.70523 | A      | 3.0627 | 404.82         | 0.0107 | 181 ->              |                        |
| 4:<br>0.69301        | A      | 3.3554 | 369.51         | 0.7471 | 181 -> 184          |                        |
| 5:<br>0.69436        | A      | 3.4903 | 355.22         | 0.3499 | 182 -> 185          |                        |
| 6:<br>0.68423        | A      | 3.6657 | 338.22         | 0.2063 | 180 -> 183          |                        |
| 7:<br>0.67700        | A      | 4.0632 | 305.14         | 0.0562 | 179 -> 183          |                        |

180 -> 185

0.12036

|                   |                                                                                                                                                                                                                                                                                                            |
|-------------------|------------------------------------------------------------------------------------------------------------------------------------------------------------------------------------------------------------------------------------------------------------------------------------------------------------|
| <b>181-HOMO-1</b> | 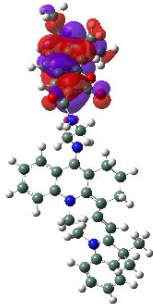 A 3D ball-and-stick model of a molecule with a molecular orbital isosurface overlaid. The isosurface is primarily located on the upper portion of the molecule, showing a complex distribution of red and blue lobes.   |
| <b>182-HOMO</b>   |  A 3D ball-and-stick model of a molecule with a molecular orbital isosurface overlaid. The isosurface is primarily located on the lower portion of the molecule, showing a complex distribution of red and blue lobes.   |
| <b>183-LUMO</b>   |  A 3D ball-and-stick model of a molecule with a molecular orbital isosurface overlaid. The isosurface is primarily located on the lower portion of the molecule, showing a complex distribution of red and blue lobes. |
| <b>184-LUMO+1</b> |  A 3D ball-and-stick model of a molecule with a molecular orbital isosurface overlaid. The isosurface is primarily located on the upper portion of the molecule, showing a complex distribution of red and blue lobes. |

**Figure S50.** Drawings of selected molecular orbitals for probe **D** listed in Table S12.

Theoretical calculations for probe  $\text{DH}^+$ .

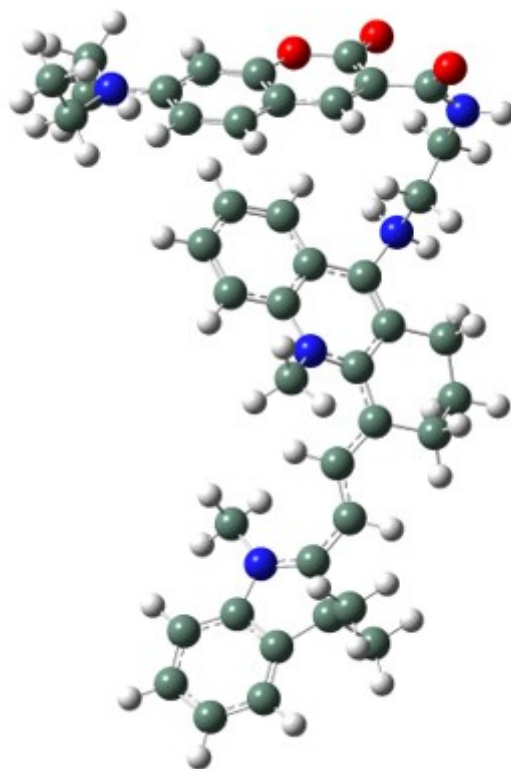

**Figure S51.** GaussView representation of probe  $\text{DH}^+$ .

**Table S14.** Calculated atomic coordinates for probe **DH<sup>+</sup>** in water.

| Row | Symbol | X        | Y        | Z        | Row | Symbol | X        | Y        | Z        |
|-----|--------|----------|----------|----------|-----|--------|----------|----------|----------|
| 1   | C      | -2.45883 | -1.22716 | -0.97208 | 41  | C      | -5.94112 | 1.89521  | -0.36888 |
| 2   | C      | -1.54908 | -2.0384  | -0.28984 | 42  | O      | -6.40099 | 2.70943  | -1.13837 |
| 3   | C      | -0.33353 | -1.53562 | 0.131991 | 43  | C      | -4.48021 | -1.30326 | 1.995603 |
| 4   | C      | 0.002836 | -0.19909 | -0.12826 | 44  | C      | -4.66451 | -2.58429 | 1.547295 |
| 5   | C      | -0.91821 | 0.630826 | -0.80509 | 45  | C      | -5.3603  | -2.84687 | 0.327883 |
| 6   | C      | -2.14909 | 0.09307  | -1.2179  | 46  | C      | -5.86116 | -1.73848 | -0.39306 |
| 7   | N      | 1.216152 | 0.325912 | 0.290361 | 47  | C      | -5.79675 | -5.83682 | 1.636015 |
| 8   | C      | 1.68356  | 1.534644 | -0.17164 | 48  | C      | -4.91684 | -5.25947 | 0.534408 |
| 9   | C      | 0.715595 | 2.461934 | -0.71221 | 49  | N      | -5.52105 | -4.11161 | -0.12892 |
| 10  | C      | -0.52805 | 1.992169 | -0.9852  | 50  | C      | -6.28956 | -4.40085 | -1.33145 |
| 11  | C      | 3.046876 | 1.881812 | -0.09485 | 51  | C      | -5.45517 | -4.30072 | -2.60306 |
| 12  | C      | 3.426072 | 3.338803 | -0.1467  | 52  | H      | -3.40797 | -1.62958 | -1.3037  |
| 13  | C      | 2.601596 | 4.062077 | -1.20103 | 53  | H      | -1.79108 | -3.07801 | -0.09628 |
| 14  | C      | 1.115256 | 3.899823 | -0.91567 | 54  | H      | 0.365975 | -2.19122 | 0.634026 |
| 15  | C      | 4.01821  | 0.87693  | -0.10387 | 55  | H      | -2.87779 | 0.696068 | -1.74958 |
| 16  | C      | 5.38021  | 1.060343 | 0.095773 | 56  | H      | 3.276608 | 3.807591 | 0.834552 |
| 17  | C      | 6.384561 | 0.095724 | 0.029622 | 57  | H      | 4.485847 | 3.442531 | -0.38488 |
| 18  | N      | 6.356719 | -1.11055 | -0.55381 | 58  | H      | 2.849834 | 5.126568 | -1.22386 |
| 19  | C      | 7.552767 | -1.81574 | -0.31405 | 59  | H      | 2.833682 | 3.653276 | -2.19028 |
| 20  | C      | 8.420552 | -1.00263 | 0.406749 | 60  | H      | 0.85412  | 4.457341 | -0.00662 |
| 21  | C      | 7.746756 | 0.314682 | 0.66972  | 61  | H      | 0.555302 | 4.363898 | -1.73399 |
| 22  | C      | 7.885698 | -3.10634 | -0.6968  | 62  | H      | 3.664346 | -0.13004 | -0.28449 |
| 23  | C      | 9.153254 | -3.56609 | -0.33708 | 63  | H      | 5.716923 | 2.028501 | 0.450028 |
| 24  | C      | 10.0395  | -2.76024 | 0.376213 | 64  | H      | 7.199195 | -3.74734 | -1.23868 |
| 25  | C      | 9.675605 | -1.4653  | 0.755164 | 65  | H      | 9.448012 | -4.57283 | -0.61651 |
| 26  | C      | 8.487629 | 1.466504 | -0.02723 | 66  | H      | 11.01883 | -3.14443 | 0.643763 |
| 27  | C      | 7.606084 | 0.586637 | 2.172693 | 67  | H      | 10.36509 | -0.83944 | 1.31413  |
| 28  | C      | 5.318641 | -1.63839 | -1.41377 | 68  | H      | 9.495723 | 1.551529 | 0.385473 |
| 29  | C      | 1.873036 | -0.36258 | 1.408522 | 69  | H      | 8.570521 | 1.29144  | -1.10217 |
| 30  | N      | -1.57371 | 2.926505 | -1.40759 | 70  | H      | 7.977438 | 2.419358 | 0.132572 |
| 31  | C      | -2.39563 | 3.376181 | -0.22425 | 71  | H      | 8.59706  | 0.666663 | 2.625908 |
| 32  | C      | -3.65178 | 4.131119 | -0.64723 | 72  | H      | 7.074174 | 1.523561 | 2.354078 |
| 33  | N      | -4.43231 | 4.461565 | 0.52271  | 73  | H      | 7.064897 | -0.22092 | 2.670951 |
| 34  | C      | -5.07197 | 3.581639 | 1.340029 | 74  | H      | 4.590175 | -2.22081 | -0.84589 |
| 35  | O      | -5.47178 | 3.910309 | 2.447584 | 75  | H      | 4.82035  | -0.81705 | -1.92588 |
| 36  | C      | -5.23047 | 2.175761 | 0.858402 | 76  | H      | 5.777394 | -2.2807  | -2.16324 |
| 37  | C      | -4.80385 | 1.152027 | 1.657083 | 77  | H      | 1.109005 | -0.62515 | 2.140462 |
| 38  | C      | -4.96433 | -0.19504 | 1.274731 | 78  | H      | 2.394358 | -1.26781 | 1.097212 |
| 39  | C      | -5.65202 | -0.46035 | 0.075806 | 79  | H      | 2.585414 | 0.317436 | 1.866434 |
| 40  | O      | -6.1256  | 0.560976 | -0.68875 | 80  | H      | -1.16333 | 3.739945 | -1.86821 |

| Row | Symbol | X        | Y        | Z        | Row | Symbol | X        | Y        | Z        |
|-----|--------|----------|----------|----------|-----|--------|----------|----------|----------|
| 81  | H      | -2.17473 | 2.498564 | -2.11511 | 91  | H      | -5.98781 | -5.10074 | 2.421181 |
| 82  | H      | -2.6528  | 2.471546 | 0.324409 | 92  | H      | -6.76278 | -6.15686 | 1.235628 |
| 83  | H      | -1.74042 | 3.987429 | 0.395185 | 93  | H      | -5.31738 | -6.70607 | 2.094696 |
| 84  | H      | -3.39562 | 5.064734 | -1.15041 | 94  | H      | -3.93212 | -4.98264 | 0.917355 |
| 85  | H      | -4.25405 | 3.54824  | -1.34584 | 95  | H      | -4.7299  | -6.01275 | -0.23509 |
| 86  | H      | -4.31027 | 5.382146 | 0.919964 | 96  | H      | -6.69304 | -5.41051 | -1.22175 |
| 87  | H      | -4.3106  | 1.382871 | 2.598011 | 97  | H      | -7.15888 | -3.74029 | -1.37372 |
| 88  | H      | -3.94823 | -1.13081 | 2.926763 | 98  | H      | -5.05181 | -3.29408 | -2.74032 |
| 89  | H      | -4.28028 | -3.40202 | 2.142568 | 99  | H      | -4.61263 | -4.99711 | -2.57131 |
| 90  | H      | -6.3805  | -1.85179 | -1.3353  | 100 | H      | -6.06093 | -4.54387 | -3.48024 |

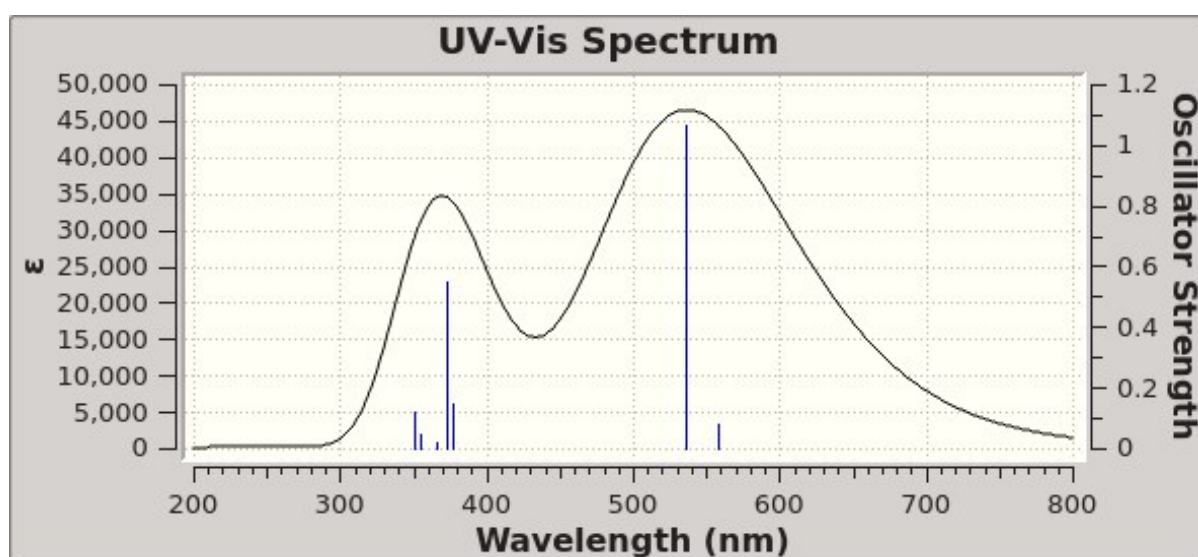

**Figure S52.** Calculated UV-Vis spectrum for probe  $\text{DH}^+$  in water.

**Table S15.** Excitation energies and oscillator strengths listing for probe **DH<sup>+</sup>** in water.

| Excited State | Nature        | E (eV) | $\lambda$ (nm) | $f$ | Orbital transitions                                            | Normalized coefficient                                       |
|---------------|---------------|--------|----------------|-----|----------------------------------------------------------------|--------------------------------------------------------------|
| 1:<br>183     | A<br>-0.43006 | 2.2191 |                |     | 558.70<br>182 -> 183                                           | 0.0814 181 -><br>0.55906                                     |
| 2:<br>183     | A<br>0.56043  | 2.3141 |                |     | 535.78<br>182 -> 183                                           | 1.0657 181 -><br>0.43212                                     |
| 3:<br>185     | A<br>0.29854  | 3.2912 |                |     | 376.72<br>182 -> 184<br>182 -> 185                             | 0.1479 181 -><br>-0.44124<br>0.44096                         |
| 4:<br>183     | A<br>-0.10017 | 3.3287 |                |     | 372.47<br>181 -> 184<br>181 -> 185<br>182 -> 184<br>182 -> 185 | 0.5530 180 -><br>0.50423<br>-0.22410<br>-0.37584<br>-0.17046 |
| 5:<br>184     | A<br>0.47805  | 3.3894 |                |     | 365.80<br>181 -> 185<br>182 -> 184<br>182 -> 185               | 0.0197 181 -><br>0.16026<br>0.39491<br>0.28350               |
| 6:<br>185     | A<br>0.56598  | 3.4982 |                |     | 354.42<br>182 -> 185                                           | 0.0460 181 -><br>-0.40084                                    |
| 7:<br>183     | A<br>-0.10698 | 3.5321 |                |     | 351.02<br>180 -> 183<br>182 -> 185                             | 0.1184 179 -><br>0.66897<br>-0.12681                         |

|                   |                                                                                                                                                                                                                                                                 |
|-------------------|-----------------------------------------------------------------------------------------------------------------------------------------------------------------------------------------------------------------------------------------------------------------|
| <b>180-HOMO-2</b> | 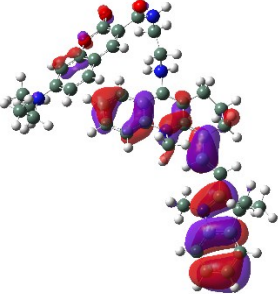 Molecular orbital visualization for 180-HOMO-2. The structure shows a complex arrangement of atoms with red and purple lobes representing the orbital's phase distribution.  |
| <b>181-HOMO-1</b> |  Molecular orbital visualization for 181-HOMO-1. The structure shows a complex arrangement of atoms with red and purple lobes representing the orbital's phase distribution. |
| <b>182-HOMO</b>   |  Molecular orbital visualization for 182-HOMO. The structure shows a complex arrangement of atoms with red and purple lobes representing the orbital's phase distribution.  |
| <b>183-LUMO</b>   |  Molecular orbital visualization for 183-LUMO. The structure shows a complex arrangement of atoms with red and purple lobes representing the orbital's phase distribution.  |



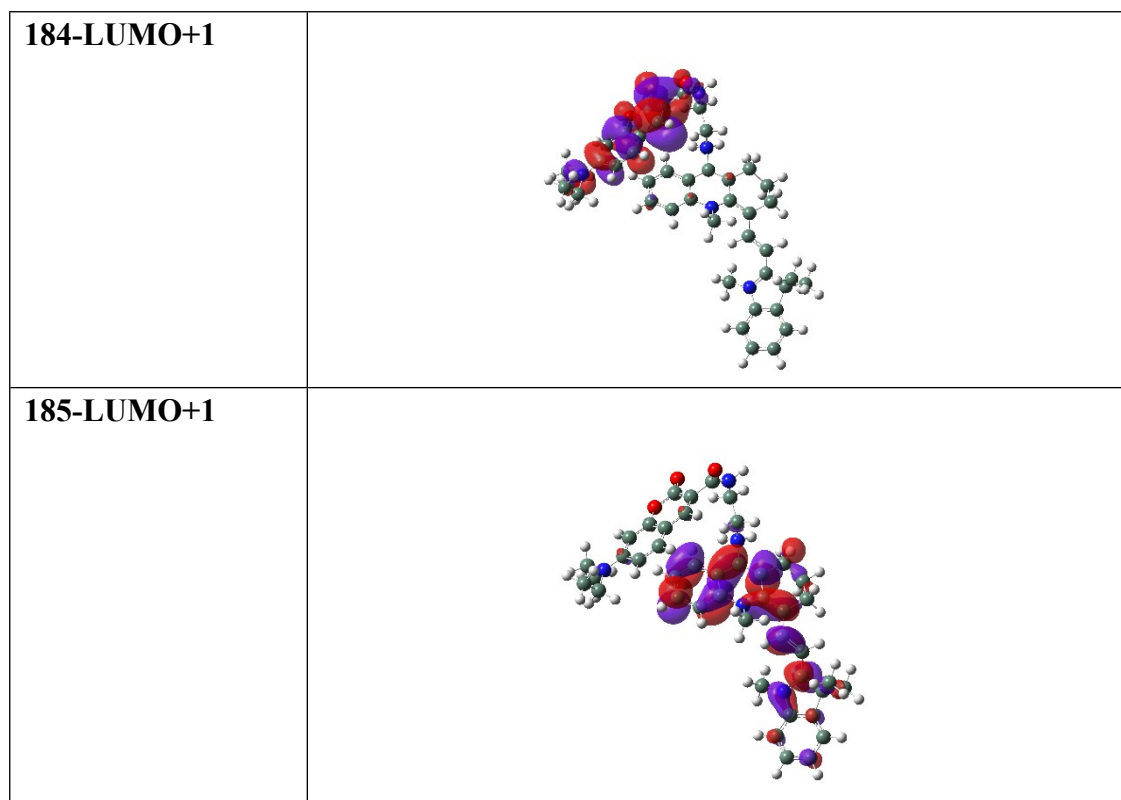

**Figure S53.** Drawings of selected molecular orbitals for probe **DH<sup>+</sup>** listed in Table S14.

## Results for the pKa Calculations.

Atomic coordinates for the models refined with the SMD<sup>7</sup> implicit solvation model in water are listed below together with those involving the added water molecule including pictures of the water adduct.

**Table S16.** Calculated atomic coordinates for probe **B**.

| Row | Symbol | X        | Y        | Z        | Row | Symbol | X        | Y        | Z        |
|-----|--------|----------|----------|----------|-----|--------|----------|----------|----------|
| 1   | C      | -1.26568 | 4.545837 | -0.14846 | 8   | C      | -2.20331 | -0.37087 | 0.185614 |
| 2   | C      | -2.6451  | 4.379004 | -0.35092 | 9   | C      | -0.84578 | -0.24733 | 0.531745 |
| 3   | C      | -3.22839 | 3.131227 | -0.23331 | 10  | C      | -0.3043  | 1.024814 | 0.787883 |
| 4   | C      | -2.44321 | 2.010746 | 0.108679 | 11  | C      | -2.75752 | -1.68822 | -0.0883  |
| 5   | C      | -1.0673  | 2.182546 | 0.394355 | 12  | C      | -2.05734 | -2.8301  | 0.595932 |
| 6   | C      | -0.49358 | 3.4615   | 0.217358 | 13  | C      | -0.57585 | -2.77048 | 0.232189 |
| 7   | N      | -3.00251 | 0.745774 | 0.143775 | 14  | C      | 0.030456 | -1.46265 | 0.730188 |

| Row | Symbol | X        | Y        | Z        | Row | Symbol | X        | Y        | Z        |
|-----|--------|----------|----------|----------|-----|--------|----------|----------|----------|
| 15  | C      | -3.70514 | -1.84883 | -1.06654 | 50  | H      | 1.000153 | -1.30366 | 0.239171 |
| 16  | C      | -4.22065 | -3.08645 | -1.54505 | 51  | H      | -4.03417 | -0.9509  | -1.576   |
| 17  | C      | -5.15724 | -3.29642 | -2.5277  | 52  | H      | -3.79656 | -4.00033 | -1.13943 |
| 18  | N      | -5.96861 | -2.39339 | -3.1614  | 53  | H      | -7.82118 | -1.37939 | -5.07601 |
| 19  | C      | -6.72447 | -3.01794 | -4.16114 | 54  | H      | -8.96695 | -2.8845  | -6.6772  |
| 20  | C      | -6.45332 | -4.38845 | -4.16321 | 55  | H      | -8.51472 | -5.31964 | -6.6842  |
| 21  | C      | -5.44008 | -4.68946 | -3.09046 | 56  | H      | -6.88543 | -6.29631 | -5.05833 |
| 22  | C      | -7.62255 | -2.44663 | -5.05892 | 57  | H      | -5.30964 | -5.78563 | -1.21257 |
| 23  | C      | -8.26199 | -3.30384 | -5.96355 | 58  | H      | -6.93491 | -5.15907 | -1.56979 |
| 24  | C      | -8.00687 | -4.67744 | -5.96954 | 59  | H      | -6.30957 | -6.56773 | -2.45378 |
| 25  | C      | -7.09187 | -5.22847 | -5.05968 | 60  | H      | -3.43006 | -5.50077 | -2.89642 |
| 26  | C      | -6.03729 | -5.60428 | -2.01015 | 61  | H      | -4.41902 | -6.27825 | -4.14845 |
| 27  | C      | -4.17229 | -5.31961 | -3.68029 | 62  | H      | -3.72604 | -4.66836 | -4.43832 |
| 28  | C      | -6.17747 | -1.01522 | -2.77368 | 63  | H      | -5.41951 | -0.34876 | -3.19689 |
| 29  | C      | -4.45993 | 0.661803 | 0.297472 | 64  | H      | -6.16317 | -0.93823 | -1.68414 |
| 30  | N      | 0.938693 | 1.132912 | 1.309785 | 65  | H      | -7.15925 | -0.69233 | -3.12139 |
| 31  | C      | 1.428216 | 2.195662 | 2.179772 | 66  | H      | -4.76964 | 1.403971 | 1.035773 |
| 32  | C      | 2.056559 | 1.572278 | 3.426838 | 67  | H      | -4.98447 | 0.848156 | -0.64221 |
| 33  | N      | 2.624078 | 2.574251 | 4.300017 | 68  | H      | -4.72079 | -0.32723 | 0.664784 |
| 34  | C      | 3.826747 | 3.137441 | 4.029668 | 69  | H      | 1.415389 | 0.251207 | 1.450557 |
| 35  | O      | 4.047991 | 4.17881  | 4.851089 | 70  | H      | 2.174905 | 2.814383 | 1.66946  |
| 36  | O      | 4.60466  | 2.724893 | 3.16691  | 71  | H      | 0.596377 | 2.837643 | 2.477321 |
| 37  | C      | 5.31457  | 4.933615 | 4.823688 | 72  | H      | 1.30301  | 1.014906 | 3.989023 |
| 38  | C      | 6.481112 | 4.024476 | 5.191643 | 73  | H      | 2.847227 | 0.871621 | 3.14164  |
| 39  | C      | 5.092286 | 5.976952 | 5.909081 | 74  | H      | 2.008756 | 3.07546  | 4.927045 |
| 40  | C      | 5.503322 | 5.607795 | 3.469802 | 75  | H      | 7.379467 | 4.636761 | 5.318241 |
| 41  | H      | -0.80403 | 5.518568 | -0.29079 | 76  | H      | 6.679306 | 3.279912 | 4.418491 |
| 42  | H      | -3.26037 | 5.228164 | -0.63579 | 77  | H      | 6.282102 | 3.510983 | 6.137919 |
| 43  | H      | -4.28384 | 3.017095 | -0.44982 | 78  | H      | 5.977114 | 6.614683 | 5.991331 |
| 44  | H      | 0.575611 | 3.590908 | 0.334826 | 79  | H      | 4.231611 | 6.609685 | 5.669655 |
| 45  | H      | -2.17067 | -2.74559 | 1.686298 | 80  | H      | 4.919456 | 5.498896 | 6.87859  |
| 46  | H      | -2.4896  | -3.7894  | 0.305055 | 81  | H      | 4.615509 | 6.192006 | 3.206622 |
| 47  | H      | -0.02664 | -3.61369 | 0.665765 | 82  | H      | 6.355365 | 6.291984 | 3.532208 |
| 48  | H      | -0.47576 | -2.84234 | -0.858   | 83  | H      | 5.70014  | 4.884249 | 2.676824 |
| 49  | H      | 0.243293 | -1.55312 | 1.807161 |     |        |          |          |          |

**Table S17.** Calculated atomic coordinates for probe **BH<sup>+</sup>**.

| Row | Symbol | X        | Y        | Z        | Row | Symbol | X        | Y        | Z        |
|-----|--------|----------|----------|----------|-----|--------|----------|----------|----------|
| 1   | C      | -3.83785 | 2.283156 | 2.025899 | 42  | H      | -4.73512 | 1.281678 | 3.718792 |
| 2   | C      | -3.83599 | 1.40868  | 3.122472 | 43  | H      | -2.73207 | 0.004857 | 4.290995 |
| 3   | C      | -2.69969 | 0.68997  | 3.452605 | 44  | H      | -2.72017 | 3.097124 | 0.411185 |
| 4   | C      | -1.53136 | 0.825456 | 2.679975 | 45  | H      | 3.589165 | 0.114806 | 2.336707 |
| 5   | C      | -1.53023 | 1.693606 | 1.56182  | 46  | H      | 3.689807 | -1.53603 | 1.732914 |
| 6   | C      | -2.69833 | 2.421512 | 1.2574   | 47  | H      | 3.886505 | 0.097396 | -0.14317 |
| 7   | N      | -0.37735 | 0.126125 | 3.006972 | 48  | H      | 2.435371 | -0.89722 | -0.31188 |
| 8   | C      | 0.69612  | 0.051929 | 2.154823 | 49  | H      | 2.633624 | 1.969226 | 0.733575 |
| 9   | C      | 0.779585 | 1.013197 | 1.080437 | 50  | H      | 1.862313 | 1.42112  | -0.74601 |
| 10  | C      | -0.31199 | 1.793337 | 0.824099 | 51  | H      | 0.341338 | -2.34388 | 3.072346 |
| 11  | C      | 1.711772 | -0.93392 | 2.311316 | 52  | H      | 3.332413 | -3.05657 | 2.936901 |
| 12  | C      | 3.069043 | -0.63793 | 1.727887 | 53  | H      | -1.13335 | -7.09109 | 4.466132 |
| 13  | C      | 2.911057 | -0.12317 | 0.302924 | 54  | H      | -0.40708 | -9.26567 | 5.412743 |
| 14  | C      | 2.061417 | 1.140373 | 0.293676 | 55  | H      | 1.994468 | -9.78221 | 5.716695 |
| 15  | C      | 1.38369  | -2.18147 | 2.835154 | 56  | H      | 3.733145 | -8.10633 | 5.074332 |
| 16  | C      | 2.270017 | -3.2423  | 3.059856 | 57  | H      | 4.691999 | -6.61172 | 3.067238 |
| 17  | C      | 1.97197  | -4.5212  | 3.516696 | 58  | H      | 3.381352 | -6.24973 | 1.923354 |
| 18  | N      | 0.770136 | -5.12103 | 3.666144 | 59  | H      | 4.524215 | -4.97383 | 2.40506  |
| 19  | C      | 0.914576 | -6.4029  | 4.229545 | 60  | H      | 4.629271 | -5.64682 | 5.433947 |
| 20  | C      | 2.270723 | -6.67432 | 4.40728  | 61  | H      | 4.458678 | -4.01605 | 4.754728 |
| 21  | C      | 3.070105 | -5.48709 | 3.946416 | 62  | H      | 3.272948 | -4.6155  | 5.936789 |
| 22  | C      | -0.07698 | -7.31078 | 4.585311 | 63  | H      | -0.9229  | -3.90437 | 3.993184 |
| 23  | C      | 0.341926 | -8.53346 | 5.122596 | 64  | H      | -0.41647 | -4.09826 | 2.289539 |
| 24  | C      | 1.698115 | -8.82493 | 5.296327 | 65  | H      | -1.21156 | -5.43177 | 3.133065 |
| 25  | C      | 2.676879 | -7.88789 | 4.937507 | 66  | H      | -0.69238 | 0.371009 | 5.052442 |
| 26  | C      | 3.970301 | -5.85048 | 2.754602 | 67  | H      | -0.85828 | -1.31775 | 4.509602 |
| 27  | C      | 3.907072 | -4.89914 | 5.09132  | 68  | H      | 0.750349 | -0.56733 | 4.624687 |
| 28  | C      | -0.51702 | -4.60124 | 3.253038 | 69  | H      | 0.434521 | 2.480385 | -0.94672 |
| 29  | C      | -0.29486 | -0.39108 | 4.380096 | 70  | H      | -1.13746 | 2.891476 | -0.78457 |
| 30  | N      | -0.24471 | 2.7803   | -0.24016 | 71  | H      | -0.45096 | 4.404297 | 1.093931 |
| 31  | C      | 0.162517 | 4.155608 | 0.226849 | 72  | H      | 1.208333 | 4.084907 | 0.531273 |
| 32  | C      | -0.00862 | 5.167476 | -0.89446 | 73  | H      | 0.596869 | 6.040146 | -0.64576 |
| 33  | N      | -1.36794 | 5.642268 | -1.08432 | 74  | H      | 0.384244 | 4.760203 | -1.83398 |
| 34  | C      | -2.34103 | 4.881095 | -1.61896 | 75  | H      | -1.56799 | 6.622144 | -0.93499 |
| 35  | O      | -3.43983 | 5.591831 | -1.86679 | 76  | H      | -5.58323 | 3.973399 | -3.94818 |
| 36  | O      | -2.21495 | 3.662649 | -1.83951 | 77  | H      | -3.92519 | 3.44304  | -3.6123  |
| 37  | C      | -4.71847 | 4.946814 | -2.24824 | 78  | H      | -4.22162 | 5.034585 | -4.35283 |
| 38  | C      | -4.5923  | 4.306597 | -3.62414 | 79  | H      | -6.6663  | 5.788977 | -2.58728 |
| 39  | C      | -5.67026 | 6.13228  | -2.29373 | 80  | H      | -5.74442 | 6.610257 | -1.31183 |
| 40  | C      | -5.1492  | 3.955    | -1.17453 | 81  | H      | -5.33184 | 6.874488 | -3.02358 |
| 41  | H      | -4.73193 | 2.844853 | 1.772142 | 82  | H      | -5.1227  | 4.425572 | -0.18654 |

| Row | Symbol | X        | Y        | Z        | Row | Symbol | X        | Y        | Z        |
|-----|--------|----------|----------|----------|-----|--------|----------|----------|----------|
| 83  | H      | -6.17948 | 3.646993 | -1.37775 | 84  | H      | -4.52169 | 3.062515 | -1.16247 |

**Table S18.** Calculated atomic coordinates for probe C.

| Row | Symbol | X        | Y        | Z        | Row | Symbol | X        | Y        | Z        |
|-----|--------|----------|----------|----------|-----|--------|----------|----------|----------|
| 1   | C      | -4.76584 | 2.652567 | 0.511325 | 35  | H      | -5.35235 | 1.146817 | 1.950398 |
| 2   | C      | -4.53095 | 1.580554 | 1.386542 | 36  | H      | -3.11901 | 0.175594 | 2.149308 |
| 3   | C      | -3.26562 | 1.038069 | 1.510174 | 37  | H      | -3.91294 | 4.001426 | -0.89562 |
| 4   | C      | -2.19007 | 1.56659  | 0.76646  | 38  | H      | 2.752285 | 1.931147 | -0.00483 |
| 5   | C      | -2.39943 | 2.699534 | -0.05787 | 39  | H      | 3.272516 | 0.48888  | -0.87024 |
| 6   | C      | -3.71393 | 3.198975 | -0.19659 | 40  | H      | 2.961172 | 2.362765 | -2.48872 |
| 7   | N      | -0.9426  | 0.971035 | 0.821473 | 41  | H      | 1.75583  | 1.10445  | -2.77571 |
| 8   | C      | 0.022317 | 1.286575 | -0.10481 | 42  | H      | 1.423954 | 3.807368 | -1.41278 |
| 9   | C      | -0.11816 | 2.437521 | -0.89698 | 43  | H      | 0.546252 | 3.1741   | -2.7991  |
| 10  | C      | -1.26589 | 3.244544 | -0.76474 | 44  | H      | 0.14329  | -1.31176 | 0.102685 |
| 11  | C      | 1.209932 | 0.45614  | -0.2473  | 45  | H      | 3.1115   | -1.4484  | -0.74637 |
| 12  | C      | 2.435052 | 1.176811 | -0.73914 | 46  | H      | -0.20744 | -6.44052 | 0.863631 |
| 13  | C      | 2.086169 | 1.864391 | -2.05664 | 47  | H      | 0.814655 | -8.65585 | 0.421786 |
| 14  | C      | 0.980152 | 2.889945 | -1.83086 | 48  | H      | 3.05595  | -8.84027 | -0.61644 |
| 15  | C      | 1.120082 | -0.90708 | -0.13358 | 49  | H      | 4.324643 | -6.77602 | -1.23373 |
| 16  | C      | 2.165645 | -1.84073 | -0.38517 | 50  | H      | 4.321561 | -4.54398 | -2.63686 |
| 17  | C      | 2.135383 | -3.2102  | -0.29081 | 51  | H      | 2.638013 | -4.02747 | -2.87103 |
| 18  | N      | 1.163384 | -4.02707 | 0.223102 | 52  | H      | 3.889502 | -2.83054 | -2.47129 |
| 19  | C      | 1.510279 | -5.37441 | 0.067691 | 53  | H      | 5.358491 | -4.49655 | -0.30208 |
| 20  | C      | 2.77087  | -5.46635 | -0.52753 | 54  | H      | 4.922005 | -2.78282 | -0.1514  |
| 21  | C      | 3.291056 | -4.07783 | -0.79084 | 55  | H      | 4.396672 | -3.94605 | 1.086682 |
| 22  | C      | 0.779782 | -6.50719 | 0.41682  | 56  | H      | 0.277044 | -2.77875 | 1.637658 |
| 23  | C      | 1.363466 | -7.75439 | 0.160433 | 57  | H      | -0.81809 | -3.29127 | 0.323196 |
| 24  | C      | 2.626957 | -7.85997 | -0.42658 | 58  | H      | -0.34144 | -4.43297 | 1.594177 |
| 25  | C      | 3.340974 | -6.7035  | -0.7754  | 59  | H      | -1.05034 | 0.618932 | 2.875307 |
| 26  | C      | 3.546986 | -3.8537  | -2.2867  | 60  | H      | -1.09639 | -0.86699 | 1.895814 |
| 27  | C      | 4.570072 | -3.80598 | 0.015162 | 61  | H      | 0.425197 | 0.030108 | 2.094178 |
| 28  | C      | 0.003095 | -3.60383 | 0.975772 | 62  | H      | -0.46734 | 4.691494 | -1.8879  |
| 29  | C      | -0.652   | 0.126623 | 1.98615  | 63  | H      | -2.95232 | 5.741019 | -1.64148 |
| 30  | N      | -1.29808 | 4.454022 | -1.36071 | 64  | H      | -2.46265 | 5.48586  | 0.042824 |
| 31  | C      | -2.08893 | 5.617743 | -0.97565 | 65  | H      | -0.41382 | 6.784971 | -0.30721 |
| 32  | C      | -1.22013 | 6.866053 | -1.04349 | 66  | H      | -0.74732 | 6.921343 | -2.0374  |
| 33  | N      | -2.02875 | 8.039223 | -0.72484 | 67  | H      | -1.42863 | 8.858041 | -0.68361 |
| 34  | H      | -5.77024 | 3.044666 | 0.380976 | 68  | H      | -2.68496 | 8.209782 | -1.48344 |

**Table S19.** Calculated atomic coordinates for probe CH<sup>+</sup>.

| Row | Symbol | X        | Y        | Z        | Row | Symbol | X        | Y        | Z        |
|-----|--------|----------|----------|----------|-----|--------|----------|----------|----------|
| 1   | C      | -2.87096 | 2.242988 | 3.724713 | 36  | H      | -1.64849 | -0.8876  | 3.218763 |
| 2   | C      | -2.63843 | 0.872745 | 3.912503 | 37  | H      | -2.4545  | 3.96518  | 2.54659  |
| 3   | C      | -1.79504 | 0.17466  | 3.064978 | 38  | H      | 2.562074 | 0.745856 | -1.65955 |
| 4   | C      | -1.16614 | 0.837201 | 1.995066 | 39  | H      | 1.715531 | -0.09288 | -2.95511 |
| 5   | C      | -1.40501 | 2.217486 | 1.791371 | 40  | H      | 1.602922 | 2.37982  | -3.274   |
| 6   | C      | -2.26091 | 2.904499 | 2.675688 | 41  | H      | -0.00524 | 1.685691 | -3.03776 |
| 7   | N      | -0.30242 | 0.157807 | 1.146372 | 42  | H      | 1.723514 | 3.129976 | -0.96776 |
| 8   | C      | 0.128837 | 0.69996  | -0.04073 | 43  | H      | 0.224393 | 3.701199 | -1.68091 |
| 9   | C      | 0.022342 | 2.131919 | -0.20755 | 44  | H      | -0.51531 | -1.7548  | -0.53068 |
| 10  | C      | -0.71921 | 2.830506 | 0.69914  | 45  | H      | 1.545507 | -2.04666 | -2.79724 |
| 11  | C      | 0.67407  | -0.103   | -1.07855 | 46  | H      | -2.44224 | -6.53611 | -1.19559 |
| 12  | C      | 1.569166 | 0.561449 | -2.0933  | 47  | H      | -2.10224 | -8.75356 | -2.24609 |
| 13  | C      | 0.95584  | 1.879965 | -2.54576 | 48  | H      | -0.26952 | -9.12788 | -3.86703 |
| 14  | C      | 0.747556 | 2.797948 | -1.34941 | 49  | H      | 1.278052 | -7.2599  | -4.46918 |
| 15  | C      | 0.254327 | -1.42632 | -1.2141  | 50  | H      | 1.40162  | -4.76137 | -5.4546  |
| 16  | C      | 0.714717 | -2.34272 | -2.16421 | 51  | H      | -0.10968 | -3.91064 | -5.0676  |
| 17  | C      | 0.295087 | -3.654   | -2.37235 | 52  | H      | 1.45405  | -3.08607 | -4.86883 |
| 18  | N      | -0.74309 | -4.32433 | -1.82876 | 53  | H      | 2.988238 | -5.47017 | -3.5797  |
| 19  | C      | -0.76392 | -5.66302 | -2.26874 | 54  | H      | 3.046015 | -3.78886 | -3.01683 |
| 20  | C      | 0.2786   | -5.86195 | -3.17298 | 55  | H      | 2.593429 | -5.08848 | -1.88999 |
| 21  | C      | 1.038438 | -4.57501 | -3.33221 | 56  | H      | -1.3651  | -3.68321 | 0.080126 |
| 22  | C      | -1.63832 | -6.6835  | -1.90989 | 57  | H      | -2.09    | -2.81621 | -1.30745 |
| 23  | C      | -1.43776 | -7.93369 | -2.50604 | 58  | H      | -2.60639 | -4.46008 | -0.92413 |
| 24  | C      | -0.40189 | -8.14605 | -3.42053 | 59  | H      | 0.525149 | -0.94287 | 2.710663 |
| 25  | C      | 0.46858  | -7.10192 | -3.76081 | 60  | H      | -0.43066 | -1.93385 | 1.579728 |
| 26  | C      | 0.93518  | -4.04458 | -4.77154 | 61  | H      | 1.170718 | -1.32388 | 1.102691 |
| 27  | C      | 2.508946 | -4.73753 | -2.92291 | 62  | H      | -1.73974 | 4.612032 | 0.864628 |
| 28  | C      | -1.75141 | -3.78654 | -0.93905 | 63  | H      | -0.72448 | 4.557324 | -0.40614 |
| 29  | C      | 0.265516 | -1.09594 | 1.661575 | 64  | H      | 0.128825 | 4.689675 | 2.412734 |
| 30  | N      | -0.81085 | 4.281567 | 0.57889  | 65  | H      | 1.20944  | 4.669407 | 0.99609  |
| 31  | C      | 0.243109 | 5.007539 | 1.373932 | 66  | H      | 0.202426 | 6.777335 | 0.163945 |
| 32  | C      | 0.063986 | 6.50566  | 1.215462 | 67  | H      | -0.96622 | 6.777959 | 1.492009 |
| 33  | N      | 1.081926 | 7.181391 | 2.011515 | 68  | H      | 1.070162 | 8.173448 | 1.793355 |
| 34  | H      | -3.53153 | 2.78394  | 4.395506 | 69  | H      | 0.844517 | 7.104662 | 2.997565 |
| 35  | H      | -3.12876 | 0.344835 | 4.725444 |     |        |          |          |          |

**Table S20.** Calculated atomic coordinates for probe **D**.

| Row | Symbol | X        | Y        | Z        | Row | Symbol | X        | Y        | Z        |
|-----|--------|----------|----------|----------|-----|--------|----------|----------|----------|
| 1   | C      | -4.0018  | 0.17682  | 3.33858  | 42  | O      | 3.546255 | 3.803449 | 4.957131 |
| 2   | C      | -4.56368 | -1.09588 | 3.151736 | 43  | C      | -0.17118 | 6.454962 | 1.961875 |
| 3   | C      | -3.77084 | -2.16785 | 2.786785 | 44  | C      | 0.256578 | 6.99039  | 0.772189 |
| 4   | C      | -2.38184 | -1.99747 | 2.612819 | 45  | C      | 1.617946 | 6.85326  | 0.345354 |
| 5   | C      | -1.79298 | -0.73666 | 2.878177 | 46  | C      | 2.510777 | 6.151086 | 1.194739 |
| 6   | C      | -2.63861 | 0.348048 | 3.202196 | 47  | C      | 0.91021  | 9.482035 | -1.54125 |
| 7   | N      | -1.5993  | -3.04657 | 2.164052 | 48  | C      | 1.12197  | 7.99295  | -1.78603 |
| 8   | C      | -0.32044 | -2.82049 | 1.713945 | 49  | N      | 2.039298 | 7.380431 | -0.82948 |
| 9   | C      | 0.321084 | -1.60679 | 2.013628 | 50  | C      | 3.4425   | 7.355983 | -1.22936 |
| 10  | C      | -0.3632  | -0.61277 | 2.737199 | 51  | C      | 3.825873 | 6.089034 | -1.98523 |
| 11  | C      | 0.388875 | -3.84186 | 0.959846 | 52  | H      | -4.63445 | 1.026586 | 3.577714 |
| 12  | C      | 1.887488 | -3.80393 | 1.083014 | 53  | H      | -5.63509 | -1.24051 | 3.261063 |
| 13  | C      | 2.362192 | -2.40384 | 0.700725 | 54  | H      | -4.23411 | -3.12778 | 2.5926   |
| 14  | C      | 1.769866 | -1.37271 | 1.65557  | 55  | H      | -2.2216  | 1.341167 | 3.311915 |
| 15  | C      | -0.2856  | -4.62296 | 0.056553 | 56  | H      | 2.191263 | -4.02461 | 2.116335 |
| 16  | C      | 0.287792 | -5.61503 | -0.78691 | 57  | H      | 2.354628 | -4.556   | 0.444059 |
| 17  | C      | -0.31375 | -6.40444 | -1.73722 | 58  | H      | 3.455509 | -2.33573 | 0.725041 |
| 18  | N      | -1.60254 | -6.39871 | -2.19851 | 59  | H      | 2.045396 | -2.19148 | -0.32796 |
| 19  | C      | -1.80377 | -7.4207  | -3.13528 | 60  | H      | 2.353858 | -1.37201 | 2.589345 |
| 20  | C      | -0.60431 | -8.1065  | -3.34094 | 61  | H      | 1.885745 | -0.36945 | 1.222904 |
| 21  | C      | 0.462468 | -7.50105 | -2.46815 | 62  | H      | -1.35118 | -4.45363 | -0.02547 |
| 22  | C      | -2.97248 | -7.77409 | -3.80491 | 63  | H      | 1.345551 | -5.82406 | -0.65721 |
| 23  | C      | -2.90056 | -8.84155 | -4.70861 | 64  | H      | -3.91223 | -7.2569  | -3.63855 |
| 24  | C      | -1.7048  | -9.52945 | -4.92972 | 65  | H      | -3.79893 | -9.13792 | -5.2445  |
| 25  | C      | -0.54206 | -9.16019 | -4.23703 | 66  | H      | -1.6769  | -10.3551 | -5.63582 |
| 26  | C      | 1.5935   | -6.89914 | -3.31518 | 67  | H      | 0.392955 | -9.69155 | -4.39932 |
| 27  | C      | 1.026405 | -8.53554 | -1.48506 | 68  | H      | 2.080357 | -7.69053 | -3.89467 |
| 28  | C      | -2.63954 | -5.46225 | -1.82766 | 69  | H      | 1.206609 | -6.1479  | -4.01075 |
| 29  | C      | -2.13029 | -4.40315 | 2.342575 | 70  | H      | 2.346787 | -6.42809 | -2.67559 |
| 30  | N      | 0.320531 | 0.455538 | 3.200908 | 71  | H      | 1.502069 | -9.35064 | -2.04043 |
| 31  | C      | -0.01614 | 1.304509 | 4.333135 | 72  | H      | 1.778532 | -8.0813  | -0.83222 |
| 32  | C      | 1.243197 | 1.547852 | 5.165067 | 73  | H      | 0.232694 | -8.95819 | -0.86121 |
| 33  | N      | 0.995125 | 2.500931 | 6.231035 | 74  | H      | -3.01711 | -5.65982 | -0.8187  |
| 34  | C      | 0.826633 | 3.828499 | 6.068985 | 75  | H      | -2.2584  | -4.43974 | -1.88046 |
| 35  | O      | 0.313865 | 4.538537 | 6.954798 | 76  | H      | -3.46764 | -5.54776 | -2.53003 |
| 36  | C      | 1.255396 | 4.440719 | 4.779573 | 77  | H      | -2.60175 | -4.46035 | 3.325268 |
| 37  | C      | 0.346874 | 5.152904 | 4.035643 | 78  | H      | -2.8624  | -4.66567 | 1.575021 |
| 38  | C      | 0.71047  | 5.751217 | 2.813004 | 79  | H      | -1.30713 | -5.11219 | 2.308873 |
| 39  | C      | 2.049266 | 5.628003 | 2.382751 | 80  | H      | 1.302619 | 0.47118  | 2.955888 |
| 40  | O      | 2.961745 | 4.956556 | 3.158514 | 81  | H      | -0.41696 | 2.268781 | 3.999352 |
| 41  | C      | 2.626592 | 4.351579 | 4.353361 | 82  | H      | -0.77258 | 0.8146   | 4.950805 |

| Row | Symbol | X        | Y        | Z        | Row | Symbol | X        | Y        | Z        |
|-----|--------|----------|----------|----------|-----|--------|----------|----------|----------|
| 83  | H      | 1.581541 | 0.615605 | 5.623242 | 92  | H      | 1.860978 | 10.02357 | -1.59224 |
| 84  | H      | 2.05645  | 1.906289 | 4.529827 | 93  | H      | 1.548603 | 7.83171  | -2.78099 |
| 85  | H      | 0.631027 | 2.132368 | 7.103159 | 94  | H      | 0.171066 | 7.453046 | -1.77595 |
| 86  | H      | -0.68089 | 5.238193 | 4.382723 | 95  | H      | 3.609074 | 8.236085 | -1.85826 |
| 87  | H      | -1.2072  | 6.573921 | 2.269298 | 96  | H      | 4.073329 | 7.492077 | -0.34615 |
| 88  | H      | -0.45161 | 7.539373 | 0.163335 | 97  | H      | 4.879505 | 6.131011 | -2.28137 |
| 89  | H      | 3.548446 | 5.990625 | 0.929434 | 98  | H      | 3.679828 | 5.196846 | -1.36778 |
| 90  | H      | 0.240989 | 9.89806  | -2.30205 | 99  | H      | 3.222138 | 5.979664 | -2.89259 |
| 91  | H      | 0.465398 | 9.66456  | -0.55763 |     |        |          |          |          |

**Table S21.** Calculated atomic coordinates for probe **DH<sup>+</sup>**.

| Row | Symbol | X        | Y        | Z        | Row | Symbol | X        | Y        | Z        |
|-----|--------|----------|----------|----------|-----|--------|----------|----------|----------|
| 1   | C      | 1.846766 | 1.712032 | 1.179588 | 30  | N      | 4.094316 | -1.36408 | 3.116828 |
| 2   | C      | 0.652257 | 1.37367  | 0.527556 | 31  | C      | 3.799646 | -1.15312 | 4.585785 |
| 3   | C      | 0.186604 | 0.071755 | 0.536326 | 32  | C      | 4.639047 | -0.01563 | 5.152271 |
| 4   | C      | 0.929603 | -0.93638 | 1.175424 | 33  | N      | 4.258667 | 0.238325 | 6.526928 |
| 5   | C      | 2.161557 | -0.61253 | 1.791741 | 34  | C      | 3.118129 | 0.845308 | 6.912972 |
| 6   | C      | 2.587517 | 0.7321   | 1.810581 | 35  | O      | 2.732413 | 0.836114 | 8.093688 |
| 7   | N      | 0.458446 | -2.24216 | 1.224594 | 36  | C      | 2.310583 | 1.534131 | 5.860844 |
| 8   | C      | 1.257643 | -3.29472 | 1.595904 | 37  | C      | 1.081821 | 1.049398 | 5.492584 |
| 9   | C      | 2.495134 | -3.00002 | 2.279115 | 38  | C      | 0.295971 | 1.716318 | 4.530451 |
| 10  | C      | 2.887188 | -1.69695 | 2.366449 | 39  | C      | 0.773777 | 2.937771 | 4.010952 |
| 11  | C      | 0.891589 | -4.64711 | 1.342649 | 40  | O      | 1.999563 | 3.419752 | 4.399089 |
| 12  | C      | 1.507388 | -5.70787 | 2.21881  | 41  | C      | 2.815677 | 2.749943 | 5.284575 |
| 13  | C      | 3.011885 | -5.48402 | 2.305364 | 42  | O      | 3.907132 | 3.264845 | 5.520221 |
| 14  | C      | 3.299872 | -4.11383 | 2.902233 | 43  | C      | -0.94273 | 1.252319 | 4.035308 |
| 15  | C      | 0.123763 | -4.96173 | 0.224276 | 44  | C      | -1.64006 | 1.955746 | 3.085211 |
| 16  | C      | -0.33212 | -6.2386  | -0.12698 | 45  | C      | -1.13639 | 3.189485 | 2.561084 |
| 17  | C      | -1.04738 | -6.61684 | -1.25759 | 46  | C      | 0.082672 | 3.6847   | 3.083298 |
| 18  | N      | -1.34541 | -5.9042  | -2.36644 | 47  | C      | -4.26595 | 3.5296   | 1.4147   |
| 19  | C      | -2.14148 | -6.65852 | -3.25039 | 48  | C      | -2.88936 | 3.231941 | 0.83381  |
| 20  | C      | -2.33963 | -7.93038 | -2.71384 | 49  | N      | -1.80203 | 3.85366  | 1.584236 |
| 21  | C      | -1.63875 | -8.01544 | -1.38669 | 50  | C      | -1.34053 | 5.140954 | 1.077026 |
| 22  | C      | -2.68398 | -6.27847 | -4.47349 | 51  | C      | -0.28088 | 5.017182 | -0.0134  |
| 23  | C      | -3.43822 | -7.23528 | -5.16217 | 52  | H      | 2.187847 | 2.742112 | 1.194874 |
| 24  | C      | -3.63882 | -8.51663 | -4.64049 | 53  | H      | 0.075175 | 2.139515 | 0.018632 |
| 25  | C      | -3.08614 | -8.87229 | -3.40269 | 54  | H      | -0.73978 | -0.16547 | 0.027457 |
| 26  | C      | -0.52636 | -9.07581 | -1.4122  | 55  | H      | 3.499599 | 1.023841 | 2.323084 |
| 27  | C      | -2.62934 | -8.30228 | -0.24915 | 56  | H      | 1.070085 | -5.6737  | 3.226391 |
| 28  | C      | -0.88949 | -4.56529 | -2.67723 | 57  | H      | 1.30195  | -6.70107 | 1.815487 |
| 29  | C      | -0.98938 | -2.4109  | 1.033946 | 58  | H      | 3.486917 | -6.25206 | 2.924621 |

| Row | Symbol | X        | Y        | Z        | Row | Symbol | X        | Y        | Z        |
|-----|--------|----------|----------|----------|-----|--------|----------|----------|----------|
| 59  | H      | 3.447161 | -5.55502 | 1.300998 | 80  | H      | 4.802011 | -2.09899 | 3.013805 |
| 60  | H      | 3.063747 | -4.1269  | 3.975409 | 81  | H      | 4.530633 | -0.524   | 2.718991 |
| 61  | H      | 4.373523 | -3.90889 | 2.823204 | 82  | H      | 2.737478 | -0.91837 | 4.656746 |
| 62  | H      | -0.11833 | -4.14364 | -0.43957 | 83  | H      | 3.991036 | -2.09995 | 5.092015 |
| 63  | H      | -0.17726 | -7.04734 | 0.58043  | 84  | H      | 5.701796 | -0.26598 | 5.133708 |
| 64  | H      | -2.54349 | -5.28432 | -4.88597 | 85  | H      | 4.502585 | 0.889631 | 4.554395 |
| 65  | H      | -3.87718 | -6.96978 | -6.12041 | 86  | H      | 4.758468 | -0.2605  | 7.255236 |
| 66  | H      | -4.22967 | -9.23935 | -5.1968  | 87  | H      | 0.71119  | 0.125498 | 5.932711 |
| 67  | H      | -3.23999 | -9.86602 | -2.98922 | 88  | H      | -1.34217 | 0.318123 | 4.422391 |
| 68  | H      | -0.9708  | -10.0603 | -1.58957 | 89  | H      | -2.5882  | 1.564264 | 2.736484 |
| 69  | H      | 0.194798 | -8.87069 | -2.20914 | 90  | H      | 0.538828 | 4.594646 | 2.714147 |
| 70  | H      | 0.00473  | -9.10479 | -0.45585 | 91  | H      | -4.36129 | 3.141922 | 2.434187 |
| 71  | H      | -3.10215 | -9.27513 | -0.41654 | 92  | H      | -4.45114 | 4.608898 | 1.441254 |
| 72  | H      | -2.11422 | -8.33123 | 0.71575  | 93  | H      | -5.04426 | 3.066768 | 0.798285 |
| 73  | H      | -3.41138 | -7.5381  | -0.20698 | 94  | H      | -2.7143  | 2.153929 | 0.767658 |
| 74  | H      | -1.44328 | -3.81502 | -2.10383 | 95  | H      | -2.82673 | 3.610607 | -0.19146 |
| 75  | H      | 0.177553 | -4.48024 | -2.46017 | 96  | H      | -2.22166 | 5.661611 | 0.688859 |
| 76  | H      | -1.03746 | -4.37468 | -3.73872 | 97  | H      | -0.97485 | 5.745311 | 1.91236  |
| 77  | H      | -1.4949  | -1.59328 | 1.550256 | 98  | H      | 0.622197 | 4.521063 | 0.355684 |
| 78  | H      | -1.27488 | -2.40527 | -0.02025 | 99  | H      | -0.66198 | 4.44401  | -0.8653  |
| 79  | H      | -1.2922  | -3.35412 | 1.484307 | 100 | H      | 0.001144 | 6.011994 | -0.37488 |

**Table S22.** Calculated atomic coordinates for probe **B** with one added water molecule.

| Row | Symbol | X        | Y        | Z        | Row | Symbol | X        | Y        | Z        |
|-----|--------|----------|----------|----------|-----|--------|----------|----------|----------|
| 1   | C      | 2.434986 | 3.583459 | -1.03909 | 17  | C      | -5.55165 | -0.56687 | 0.230879 |
| 2   | C      | 1.300491 | 4.200552 | -0.48792 | 18  | N      | -5.96534 | 0.713555 | -0.02393 |
| 3   | C      | 0.307731 | 3.445429 | 0.108082 | 19  | C      | -7.32409 | 0.740283 | -0.36214 |
| 4   | C      | 0.432204 | 2.042674 | 0.182317 | 20  | C      | -7.85131 | -0.55077 | -0.27608 |
| 5   | C      | 1.609214 | 1.418538 | -0.29704 | 21  | C      | -6.75895 | -1.50011 | 0.140046 |
| 6   | C      | 2.581945 | 2.214158 | -0.94295 | 22  | C      | -8.10681 | 1.827563 | -0.74218 |
| 7   | N      | -0.59561 | 1.274048 | 0.698791 | 23  | C      | -9.45744 | 1.582785 | -1.02152 |
| 8   | C      | -0.61465 | -0.08591 | 0.506746 | 24  | C      | -9.99922 | 0.298464 | -0.92811 |
| 9   | C      | 0.552768 | -0.74963 | 0.090221 | 25  | C      | -9.18807 | -0.78276 | -0.55181 |
| 10  | C      | 1.723011 | -0.01211 | -0.16257 | 26  | C      | -7.06672 | -2.12934 | 1.507558 |
| 11  | C      | -1.82112 | -0.85516 | 0.771363 | 27  | C      | -6.53904 | -2.59418 | -0.91217 |
| 12  | C      | -1.58894 | -2.28445 | 1.179396 | 28  | C      | -5.18892 | 1.917048 | 0.181532 |
| 13  | C      | -0.73667 | -2.95651 | 0.105776 | 29  | C      | -1.55378 | 1.946117 | 1.584644 |
| 14  | C      | 0.613694 | -2.25611 | 0.000809 | 30  | N      | 2.895265 | -0.65802 | -0.35614 |
| 15  | C      | -3.05348 | -0.34063 | 0.459792 | 31  | C      | 4.226083 | -0.15708 | -0.03296 |
| 16  | C      | -4.29496 | -1.03383 | 0.528997 | 32  | C      | 4.970894 | -1.19979 | 0.80198  |



| Row | Symbol | X        | Y        | Z        | Row | Symbol | X        | Y        | Z        |
|-----|--------|----------|----------|----------|-----|--------|----------|----------|----------|
| 33  | N      | 6.316101 | -0.77167 | 1.113257 | 60  | H      | -5.7168  | -3.25402 | -0.61764 |
| 34  | C      | 7.305909 | -0.86246 | 0.190743 | 61  | H      | -7.44637 | -3.19898 | -1.012   |
| 35  | O      | 8.398318 | -0.20304 | 0.61412  | 62  | H      | -6.30338 | -2.15868 | -1.88821 |
| 36  | O      | 7.208648 | -1.48636 | -0.86791 | 63  | H      | -4.56559 | 2.158344 | -0.68509 |
| 37  | C      | 9.649631 | -0.1918  | -0.16657 | 64  | H      | -4.55522 | 1.794551 | 1.062493 |
| 38  | C      | 10.20473 | -1.60509 | -0.29642 | 65  | H      | -5.86533 | 2.751734 | 0.368492 |
| 39  | C      | 10.5644  | 0.660229 | 0.7014   | 66  | H      | -0.99821 | 2.617771 | 2.241811 |
| 40  | C      | 9.428897 | 0.476168 | -1.51885 | 67  | H      | -2.29653 | 2.521305 | 1.027714 |
| 41  | H      | 3.188054 | 4.176219 | -1.55004 | 68  | H      | -2.05828 | 1.199388 | 2.1923   |
| 42  | H      | 1.178851 | 5.278144 | -0.55691 | 69  | H      | 2.829901 | -1.6679  | -0.33369 |
| 43  | H      | -0.5846  | 3.937598 | 0.476232 | 70  | H      | 4.801643 | 0.055017 | -0.94099 |
| 44  | H      | 3.441382 | 1.742883 | -1.40427 | 71  | H      | 4.138212 | 0.768064 | 0.541105 |
| 45  | H      | -1.06063 | -2.32226 | 2.142916 | 72  | H      | 4.44109  | -1.38091 | 1.740776 |
| 46  | H      | -2.53366 | -2.81473 | 1.314217 | 73  | H      | 5.028608 | -2.14801 | 0.26031  |
| 47  | H      | -0.57823 | -4.01742 | 0.329754 | 74  | H      | 6.450001 | -0.1109  | 1.867462 |
| 48  | H      | -1.26676 | -2.90148 | -0.85315 | 75  | H      | 11.20331 | -1.55255 | -0.74143 |
| 49  | H      | 1.267224 | -2.61474 | 0.81174  | 76  | H      | 9.577968 | -2.23358 | -0.93169 |
| 50  | H      | 1.102298 | -2.54939 | -0.93876 | 77  | H      | 10.29493 | -2.07268 | 0.68943  |
| 51  | H      | -3.0729  | 0.662518 | 0.050248 | 78  | H      | 11.54562 | 0.745942 | 0.225804 |
| 52  | H      | -4.26958 | -2.08569 | 0.798022 | 79  | H      | 10.15325 | 1.666811 | 0.828628 |
| 53  | H      | -7.69869 | 2.829336 | -0.83408 | 80  | H      | 10.69748 | 0.20651  | 1.688711 |
| 54  | H      | -10.0912 | 2.413589 | -1.32194 | 81  | H      | 8.955268 | 1.454719 | -1.38904 |
| 55  | H      | -11.0501 | 0.136035 | -1.15265 | 82  | H      | 10.40064 | 0.628869 | -1.99886 |
| 56  | H      | -9.59991 | -1.78677 | -0.47916 | 83  | H      | 8.810635 | -0.13276 | -2.18061 |
| 57  | H      | -6.25043 | -2.78766 | 1.821959 | 84  | O      | 3.323572 | -4.55697 | -0.01907 |
| 58  | H      | -7.20835 | -1.35875 | 2.27175  | 85  | H      | 3.367017 | -3.78751 | 0.562476 |
| 59  | H      | -7.98338 | -2.72469 | 1.440846 | 86  | H      | 2.477917 | -4.45999 | -0.47425 |

**Table S23.** Calculated atomic coordinates for probe **BH<sup>+</sup>** with one added water molecule.

| Row | Symbol | X        | Y        | Z        | Row | Symbol | X        | Y        | Z        |
|-----|--------|----------|----------|----------|-----|--------|----------|----------|----------|
| 1   | C      | 3.301864 | 2.54198  | 1.17759  | 43  | H      | 0.071965 | 2.755654 | 2.208429 |
| 2   | C      | 2.129788 | 3.072343 | 1.734983 | 44  | H      | 4.215575 | 0.868034 | 0.243681 |
| 3   | C      | 0.971598 | 2.315857 | 1.795685 | 45  | H      | -1.5958  | -3.5848  | 0.992738 |
| 4   | C      | 0.95896  | 1.003665 | 1.288118 | 46  | H      | -2.59219 | -3.24488 | -0.41767 |
| 5   | C      | 2.135212 | 0.462866 | 0.715001 | 47  | H      | -0.51466 | -4.4845  | -1.04674 |
| 6   | C      | 3.300729 | 1.254431 | 0.6753   | 48  | H      | -0.58137 | -2.8927  | -1.81242 |
| 7   | N      | -0.19343 | 0.231811 | 1.349079 | 49  | H      | 0.971981 | -3.65602 | 0.709927 |
| 8   | C      | -0.31003 | -0.95139 | 0.660338 | 50  | H      | 1.662303 | -3.30502 | -0.86344 |
| 9   | C      | 0.905622 | -1.60332 | 0.228437 | 51  | H      | -2.50599 | 0.366057 | 0.299549 |
| 10  | C      | 2.067903 | -0.88828 | 0.249389 | 52  | H      | -4.21552 | -2.17646 | 0.013794 |
| 11  | C      | -1.57658 | -1.52715 | 0.36879  | 53  | H      | -6.42708 | 3.579206 | -0.72697 |
| 12  | C      | -1.6413  | -3.00224 | 0.06156  | 54  | H      | -8.89119 | 3.825978 | -0.85527 |
| 13  | C      | -0.4883  | -3.40788 | -0.84814 | 55  | H      | -10.3768 | 1.852038 | -0.70562 |
| 14  | C      | 0.838476 | -3.047   | -0.19588 | 56  | H      | -9.40786 | -0.43343 | -0.41814 |
| 15  | C      | -2.68837 | -0.69688 | 0.225709 | 57  | H      | -7.7193  | -2.23779 | -1.4759  |
| 16  | C      | -4.00054 | -1.11297 | -0.02259 | 58  | H      | -6.4472  | -1.38595 | -2.3779  |
| 17  | C      | -5.1263  | -0.32024 | -0.22737 | 59  | H      | -6.02811 | -2.75318 | -1.31942 |
| 18  | N      | -5.21408 | 1.01198  | -0.4295  | 60  | H      | -7.87742 | -1.98454 | 1.06384  |
| 19  | C      | -6.55928 | 1.420044 | -0.51689 | 61  | H      | -6.18967 | -2.51296 | 1.205843 |
| 20  | C      | -7.38373 | 0.300015 | -0.41929 | 62  | H      | -6.7024  | -0.97127 | 1.929318 |
| 21  | C      | -6.52619 | -0.92252 | -0.24476 | 63  | H      | -3.6888  | 2.234539 | 0.363423 |
| 22  | C      | -7.06802 | 2.705204 | -0.66984 | 64  | H      | -3.34264 | 1.483609 | -1.22264 |
| 23  | C      | -8.45987 | 2.835309 | -0.73738 | 65  | H      | -4.48035 | 2.830399 | -1.11081 |
| 24  | C      | -9.29944 | 1.720773 | -0.65132 | 66  | H      | -0.7019  | 0.94715  | 3.239674 |
| 25  | C      | -8.76049 | 0.437132 | -0.48941 | 67  | H      | -1.81676 | 1.48591  | 1.958705 |
| 26  | C      | -6.68411 | -1.88486 | -1.43332 | 68  | H      | -1.86022 | -0.19626 | 2.535572 |
| 27  | C      | -6.83817 | -1.64144 | 1.075077 | 69  | H      | 3.150544 | -2.18555 | -0.97528 |
| 28  | C      | -4.11513 | 1.939893 | -0.6009  | 70  | H      | 3.966877 | -0.83795 | -0.62705 |
| 29  | C      | -1.21257 | 0.651226 | 2.321286 | 71  | H      | 4.083865 | -1.53803 | 1.769218 |
| 30  | N      | 3.303321 | -1.51117 | -0.18877 | 72  | H      | 3.456257 | -3.09595 | 1.179753 |
| 31  | C      | 4.044944 | -2.21578 | 0.914325 | 73  | H      | 5.798188 | -3.38581 | 1.153746 |
| 32  | C      | 5.437351 | -2.62473 | 0.460069 | 74  | H      | 5.391431 | -3.08728 | -0.53222 |
| 33  | N      | 6.418692 | -1.55429 | 0.463149 | 75  | H      | 7.186449 | -1.59336 | 1.119655 |
| 34  | C      | 6.442082 | -0.58945 | -0.47646 | 76  | H      | 8.097605 | 1.988277 | -3.18507 |
| 35  | O      | 7.532079 | 0.171763 | -0.37018 | 77  | H      | 6.888056 | 0.698545 | -3.05625 |
| 36  | O      | 5.54442  | -0.44096 | -1.32311 | 78  | H      | 8.612163 | 0.335811 | -2.80016 |
| 37  | C      | 7.695799 | 1.412765 | -1.16165 | 79  | H      | 9.254809 | 2.891894 | -1.14463 |
| 38  | C      | 7.823487 | 1.078392 | -2.64199 | 80  | H      | 8.92819  | 2.178747 | 0.447909 |
| 39  | C      | 9.007032 | 1.963437 | -0.62241 | 81  | H      | 9.822436 | 1.250413 | -0.78008 |
| 40  | C      | 6.551901 | 2.377322 | -0.87305 | 82  | H      | 6.429309 | 2.513086 | 0.20619  |
| 41  | H      | 4.208143 | 3.138521 | 1.131249 | 83  | H      | 6.795464 | 3.349136 | -1.31348 |
| 42  | H      | 2.119456 | 4.089675 | 2.115872 | 84  | H      | 5.607644 | 2.035266 | -1.29955 |

| Row | Symbol | X        | Y       | Z        | Row | Symbol | X        | Y        | Z        |
|-----|--------|----------|---------|----------|-----|--------|----------|----------|----------|
| 85  | O      | 3.426607 | -3.0187 | -2.51174 | 87  | H      | 3.354667 | -3.97902 | -2.43101 |
| 86  | H      | 4.36423  | -2.8545 | -2.68339 |     |        |          |          |          |

**Table S24.** Calculated atomic coordinates for probe **C** with one added water molecule near center N atom.

| Row | Symbol | X        | Y        | Z        | Row | Symbol | X        | Y        | Z        |
|-----|--------|----------|----------|----------|-----|--------|----------|----------|----------|
| 1   | C      | -4.79902 | 2.668164 | 0.524227 | 37  | H      | -3.93866 | 4.023021 | -0.87326 |
| 2   | C      | -4.56964 | 1.586797 | 1.389516 | 38  | H      | 2.711859 | 1.948741 | 0.042934 |
| 3   | C      | -3.30733 | 1.036221 | 1.508172 | 39  | H      | 3.252593 | 0.516697 | -0.82642 |
| 4   | C      | -2.22886 | 1.565378 | 0.769048 | 40  | H      | 2.949981 | 2.405798 | -2.43257 |
| 5   | C      | -2.43365 | 2.703698 | -0.04891 | 41  | H      | 1.760401 | 1.139013 | -2.7489  |
| 6   | C      | -3.74488 | 3.213143 | -0.18122 | 42  | H      | 1.388273 | 3.821887 | -1.35861 |
| 7   | N      | -0.98295 | 0.965492 | 0.822855 | 43  | H      | 0.537233 | 3.20208  | -2.76793 |
| 8   | C      | -0.01208 | 1.288178 | -0.09397 | 44  | H      | 0.124047 | -1.31179 | 0.096496 |
| 9   | C      | -0.1509  | 2.442504 | -0.88242 | 45  | H      | 3.102529 | -1.42079 | -0.7198  |
| 10  | C      | -1.30099 | 3.24507  | -0.7585  | 46  | H      | -0.19019 | -6.44787 | 0.833811 |
| 11  | C      | 1.18212  | 0.466117 | -0.23    | 47  | H      | 0.855586 | -8.65232 | 0.393286 |
| 12  | C      | 2.409052 | 1.198238 | -0.70135 | 48  | H      | 3.108899 | -8.81299 | -0.6227  |
| 13  | C      | 2.073734 | 1.894507 | -2.01771 | 49  | H      | 4.366059 | -6.7352  | -1.21792 |
| 14  | C      | 0.957032 | 2.908258 | -1.79657 | 50  | H      | 4.360433 | -4.49679 | -2.61028 |
| 15  | C      | 1.100632 | -0.89853 | -0.12577 | 51  | H      | 2.675044 | -3.99446 | -2.86155 |
| 16  | C      | 2.155987 | -1.82254 | -0.3711  | 52  | H      | 3.911057 | -2.78808 | -2.44232 |
| 17  | C      | 2.136324 | -3.1927  | -0.28325 | 53  | H      | 5.369818 | -4.45212 | -0.26328 |
| 18  | N      | 1.166185 | -4.0198  | 0.217138 | 54  | H      | 4.917872 | -2.74252 | -0.11119 |
| 19  | C      | 1.526254 | -5.36356 | 0.059885 | 55  | H      | 4.387732 | -3.91472 | 1.116365 |
| 20  | C      | 2.79368  | -5.44213 | -0.52258 | 56  | H      | 0.256295 | -2.7846  | 1.628178 |
| 21  | C      | 3.304787 | -4.04815 | -0.77427 | 57  | H      | -0.82214 | -3.30062 | 0.301271 |
| 22  | C      | 0.802107 | -6.50404 | 0.396905 | 58  | H      | -0.3483  | -4.44377 | 1.572013 |
| 23  | C      | 1.399184 | -7.74505 | 0.141302 | 59  | H      | -1.10536 | 0.591325 | 2.871932 |
| 24  | C      | 2.669479 | -7.83725 | -0.43317 | 60  | H      | -1.14398 | -0.88392 | 1.875892 |
| 25  | C      | 3.377013 | -6.67322 | -0.76974 | 61  | H      | 0.3759   | 0.011574 | 2.095594 |
| 26  | C      | 3.575662 | -3.81508 | -2.2661  | 62  | H      | -0.51437 | 4.678361 | -1.90665 |
| 27  | C      | 4.57228  | -3.7691  | 0.047446 | 63  | H      | -2.97824 | 5.768871 | -1.5959  |
| 28  | C      | -0.00474 | -3.60918 | 0.960419 | 64  | H      | -2.44784 | 5.494226 | 0.072595 |
| 29  | C      | -0.70048 | 0.108701 | 1.980571 | 65  | H      | -0.37193 | 6.748128 | -0.34375 |
| 30  | N      | -1.33901 | 4.450201 | -1.36649 | 66  | H      | -0.78454 | 6.924474 | -2.05435 |
| 31  | C      | -2.09937 | 5.625891 | -0.95493 | 67  | H      | -1.36076 | 8.84841  | -0.64153 |
| 32  | C      | -1.20989 | 6.858826 | -1.03996 | 68  | H      | -2.66804 | 8.2365   | -1.38578 |
| 33  | N      | -1.97835 | 8.041901 | -0.66344 | 69  | O      | 1.981204 | 6.023879 | -3.12993 |
| 34  | H      | -5.80114 | 3.067731 | 0.399078 | 70  | H      | 2.256085 | 5.102229 | -3.21343 |
| 35  | H      | -5.39318 | 1.152804 | 1.95003  | 71  | H      | 1.384483 | 6.026    | -2.37058 |
| 36  | H      | -3.16568 | 0.167889 | 2.140427 |     |        |          |          |          |

**Table S25.** Calculated atomic coordinates for probe  $\text{CH}^+$  with one added water molecule near center N atom.

| Row | Symbol | X        | Y        | Z        | Row | Symbol | X        | Y        | Z        |
|-----|--------|----------|----------|----------|-----|--------|----------|----------|----------|
| 1   | C      | -2.76737 | 2.319962 | 3.801978 | 37  | H      | -2.32518 | 4.029546 | 2.614578 |
| 2   | C      | -2.56866 | 0.943398 | 3.985979 | 38  | H      | 2.62091  | 0.785269 | -1.50035 |
| 3   | C      | -1.75411 | 0.225672 | 3.127729 | 39  | H      | 1.884912 | -0.11682 | -2.82078 |
| 4   | C      | -1.12233 | 0.873907 | 2.050024 | 40  | H      | 1.685543 | 2.336353 | -3.22592 |
| 5   | C      | -1.33675 | 2.257909 | 1.842493 | 41  | H      | 0.095051 | 1.591968 | -3.029   |
| 6   | C      | -2.16064 | 2.965692 | 2.742199 | 42  | H      | 1.684909 | 3.21084  | -0.98067 |
| 7   | N      | -0.27823 | 0.175055 | 1.197765 | 43  | H      | 0.151633 | 3.626463 | -1.7347  |
| 8   | C      | 0.16245  | 0.706338 | 0.012113 | 44  | H      | -0.50807 | -1.73675 | -0.50595 |
| 9   | C      | 0.050457 | 2.132163 | -0.17895 | 45  | H      | 1.578196 | -2.04502 | -2.74964 |
| 10  | C      | -0.66914 | 2.854493 | 0.730948 | 46  | H      | -2.48845 | -6.49225 | -1.23337 |
| 11  | C      | 0.728344 | -0.10938 | -1.01073 | 47  | H      | -2.19986 | -8.68721 | -2.34308 |
| 12  | C      | 1.663781 | 0.553326 | -1.98794 | 48  | H      | -0.38958 | -9.05348 | -3.99162 |
| 13  | C      | 1.028254 | 1.83647  | -2.50675 | 49  | H      | 1.186817 | -7.19877 | -4.55959 |
| 14  | C      | 0.741282 | 2.786171 | -1.35139 | 50  | H      | 1.353342 | -4.68457 | -5.48148 |
| 15  | C      | 0.282201 | -1.41745 | -1.17029 | 51  | H      | -0.13528 | -3.80985 | -5.06173 |
| 16  | C      | 0.736432 | -2.33404 | -2.1281  | 52  | H      | 1.448176 | -3.02579 | -4.8553  |
| 17  | C      | 0.292212 | -3.62968 | -2.36304 | 53  | H      | 2.938838 | -5.47142 | -3.63601 |
| 18  | N      | -0.7542  | -4.29632 | -1.82456 | 54  | H      | 3.036169 | -3.80588 | -3.03355 |
| 19  | C      | -0.80478 | -5.62129 | -2.29928 | 55  | H      | 2.564154 | -5.12234 | -1.93473 |
| 20  | C      | 0.225265 | -5.81675 | -3.2189  | 56  | H      | -1.31789 | -3.63552 | 0.09456  |
| 21  | C      | 1.009857 | -4.54149 | -3.35194 | 57  | H      | -2.10324 | -2.79824 | -1.27681 |
| 22  | C      | -1.69394 | -6.63544 | -1.95876 | 58  | H      | -2.58391 | -4.44292 | -0.85143 |
| 23  | C      | -1.52244 | -7.87347 | -2.58865 | 59  | H      | 0.517762 | -0.95005 | 2.761227 |
| 24  | C      | -0.49971 | -8.08138 | -3.51857 | 60  | H      | -0.45188 | -1.91495 | 1.618755 |
| 25  | C      | 0.386661 | -7.04444 | -3.83984 | 61  | H      | 1.165088 | -1.3361  | 1.155905 |
| 26  | C      | 0.908429 | -3.97457 | -4.77718 | 62  | H      | -1.7532  | 4.645252 | 0.727555 |
| 27  | C      | 2.479534 | -4.74495 | -2.9583  | 63  | H      | -0.56052 | 4.550764 | -0.39147 |
| 28  | C      | -1.7386  | -3.75965 | -0.90848 | 64  | H      | -0.0319  | 4.796631 | 2.489871 |
| 29  | C      | 0.261291 | -1.09253 | 1.710237 | 65  | H      | 1.20164  | 4.675672 | 1.213209 |
| 30  | N      | -0.76457 | 4.298446 | 0.580735 | 66  | H      | 0.332991 | 6.743555 | 0.148667 |
| 31  | C      | 0.203119 | 5.047001 | 1.453268 | 67  | H      | -0.95903 | 6.851485 | 1.350892 |
| 32  | C      | 0.08325  | 6.537535 | 1.19485  | 68  | H      | 1.058626 | 8.218435 | 1.788861 |
| 33  | N      | 1.038356 | 7.236453 | 2.048598 | 69  | H      | 0.711798 | 7.206345 | 3.011567 |
| 34  | H      | -3.40107 | 2.877956 | 4.484759 | 70  | O      | -3.31267 | 5.311974 | 0.747761 |
| 35  | H      | -3.06064 | 0.427489 | 4.805618 | 71  | H      | -3.50512 | 5.709386 | -0.11235 |
| 36  | H      | -1.63187 | -0.83988 | 3.279969 | 72  | H      | -3.96815 | 4.608703 | 0.852231 |

**Table S26.** Calculated atomic coordinates for probe **C** with one added water molecule near outer N atom.

| Row | Symbol | X        | Y        | Z        | Row | Symbol | X        | Y        | Z        |
|-----|--------|----------|----------|----------|-----|--------|----------|----------|----------|
| 1   | C      | 4.675669 | 3.44776  | -0.60515 | 37  | H      | 5.6108   | 1.681913 | -1.3382  |
| 2   | C      | 3.573419 | 3.983022 | 0.07995  | 38  | H      | 0.948589 | -2.866   | 1.422678 |
| 3   | C      | 2.563606 | 3.158787 | 0.540318 | 39  | H      | -0.52885 | -3.09596 | 0.489657 |
| 4   | C      | 2.638357 | 1.764958 | 0.339541 | 40  | H      | 1.387535 | -4.16013 | -0.70061 |
| 5   | C      | 3.78611  | 1.206745 | -0.2738  | 41  | H      | 0.771784 | -2.79066 | -1.63035 |
| 6   | C      | 4.775236 | 2.081372 | -0.77671 | 42  | H      | 3.278715 | -2.96275 | 0.094045 |
| 7   | N      | 1.589248 | 0.946212 | 0.717368 | 43  | H      | 3.16478  | -2.56549 | -1.61626 |
| 8   | C      | 1.519157 | -0.35086 | 0.266826 | 44  | H      | -0.88913 | 0.586606 | 0.015783 |
| 9   | C      | 2.660401 | -0.9624  | -0.28048 | 45  | H      | -2.24262 | -2.15099 | 0.484404 |
| 10  | C      | 3.853835 | -0.22779 | -0.4095  | 46  | H      | -5.4667  | 2.997687 | -0.82903 |
| 11  | C      | 0.281705 | -1.10525 | 0.385582 | 47  | H      | -7.93333 | 2.797013 | -0.79891 |
| 12  | C      | 0.442341 | -2.59725 | 0.484372 | 48  | H      | -9.03195 | 0.636461 | -0.28563 |
| 13  | C      | 1.282301 | -3.06947 | -0.70004 | 49  | H      | -7.64631 | -1.38448 | 0.213378 |
| 14  | C      | 2.664543 | -2.42806 | -0.64801 | 50  | H      | -5.75229 | -3.0119  | -0.71067 |
| 15  | C      | -0.92486 | -0.47676 | 0.210462 | 51  | H      | -4.70156 | -2.10669 | -1.82125 |
| 16  | C      | -2.20692 | -1.09277 | 0.242022 | 52  | H      | -3.99089 | -3.21546 | -0.62713 |
| 17  | C      | -3.44694 | -0.53176 | 0.049578 | 53  | H      | -5.79937 | -2.41789 | 1.773994 |
| 18  | N      | -3.79095 | 0.74685  | -0.2985  | 54  | H      | -4.03989 | -2.63428 | 1.847689 |
| 19  | C      | -5.18339 | 0.899271 | -0.33392 | 55  | H      | -4.77065 | -1.10871 | 2.393477 |
| 20  | C      | -5.79274 | -0.32181 | -0.03589 | 56  | H      | -2.36477 | 2.192248 | 0.271192 |
| 21  | C      | -4.72622 | -1.35126 | 0.226105 | 57  | H      | -2.13949 | 1.479547 | -1.35208 |
| 22  | C      | -5.9314  | 2.041409 | -0.60929 | 58  | H      | -3.4347  | 2.642632 | -1.06816 |
| 23  | C      | -7.32638 | 1.920162 | -0.58722 | 59  | H      | 1.259322 | 1.979306 | 2.498511 |
| 24  | C      | -7.94729 | 0.702706 | -0.29713 | 60  | H      | -0.0642  | 2.158053 | 1.320675 |
| 25  | C      | -7.17275 | -0.43276 | -0.01663 | 61  | H      | 0.150836 | 0.63053  | 2.202742 |
| 26  | C      | -4.79319 | -2.49119 | -0.80067 | 62  | H      | 4.902835 | -1.86203 | -0.88422 |
| 27  | C      | -4.83696 | -1.91023 | 1.651198 | 63  | H      | 6.900555 | -0.10945 | -1.26828 |
| 28  | C      | -2.87785 | 1.820105 | -0.62212 | 64  | H      | 6.320051 | 0.350443 | 0.341442 |
| 29  | C      | 0.670099 | 1.46442  | 1.737496 | 65  | H      | 6.609822 | -1.94533 | 1.157699 |
| 30  | N      | 4.999266 | -0.8659  | -0.73409 | 66  | H      | 7.038629 | -2.50993 | -0.46485 |
| 31  | C      | 6.356949 | -0.46494 | -0.38354 | 67  | H      | 8.957672 | -2.03701 | 0.968926 |
| 32  | C      | 7.096118 | -1.65169 | 0.221653 | 68  | H      | 8.974856 | -1.08549 | -0.35209 |
| 33  | N      | 8.476751 | -1.26294 | 0.517845 | 69  | O      | 8.334299 | 0.935251 | 2.149901 |
| 34  | H      | 5.441608 | 4.103204 | -1.00923 | 70  | H      | 8.435509 | 0.130318 | 1.562546 |
| 35  | H      | 3.489953 | 5.056819 | 0.224066 | 71  | H      | 9.088356 | 0.905859 | 2.750032 |
| 36  | H      | 1.694736 | 3.598555 | 1.015398 |     |        |          |          |          |

**Table S27.** Calculated atomic coordinates for probe  $\text{CH}^+$  with one added water molecule near outer N atom.

| Row | Symbol | X        | Y        | Z        | Row | Symbol | X        | Y        | Z        |
|-----|--------|----------|----------|----------|-----|--------|----------|----------|----------|
| 1   | C      | 4.400427 | 3.978598 | -0.53978 | 37  | H      | 5.591976 | 2.306328 | -1.0631  |
| 2   | C      | 3.189076 | 4.428833 | 0.006903 | 38  | H      | 1.151758 | -2.6834  | 1.593914 |
| 3   | C      | 2.241415 | 3.525234 | 0.450059 | 39  | H      | -0.24111 | -2.97744 | 0.555678 |
| 4   | C      | 2.475242 | 2.13927  | 0.340124 | 40  | H      | 1.812814 | -3.88876 | -0.52796 |
| 5   | C      | 3.691018 | 1.671802 | -0.21367 | 41  | H      | 1.191901 | -2.5232  | -1.46294 |
| 6   | C      | 4.643919 | 2.62245  | -0.63967 | 42  | H      | 3.499978 | -2.59264 | 0.517487 |
| 7   | N      | 1.527124 | 1.236346 | 0.787519 | 43  | H      | 3.610452 | -2.21254 | -1.19273 |
| 8   | C      | 1.611385 | -0.09398 | 0.455629 | 44  | H      | -0.84513 | 0.652829 | 0.092738 |
| 9   | C      | 2.84708  | -0.6182  | -0.00443 | 45  | H      | -2.02002 | -2.14502 | 0.638948 |
| 10  | C      | 3.914972 | 0.245506 | -0.2641  | 46  | H      | -5.42414 | 2.736359 | -1.14198 |
| 11  | C      | 0.445111 | -0.94026 | 0.541199 | 47  | H      | -7.88635 | 2.462161 | -1.08549 |
| 12  | C      | 0.695375 | -2.42102 | 0.628929 | 48  | H      | -8.91421 | 0.326329 | -0.36739 |
| 13  | C      | 1.643603 | -2.80633 | -0.50367 | 49  | H      | -7.46744 | -1.59394 | 0.317516 |
| 14  | C      | 2.975656 | -2.0938  | -0.30772 | 50  | H      | -5.50626 | -3.23741 | -0.46452 |
| 15  | C      | -0.80491 | -0.40508 | 0.312315 | 51  | H      | -4.4825  | -2.40066 | -1.65144 |
| 16  | C      | -2.03438 | -1.10494 | 0.327672 | 52  | H      | -3.73914 | -3.37005 | -0.35893 |
| 17  | C      | -3.2991  | -0.61821 | 0.069398 | 53  | H      | -5.58178 | -2.42484 | 1.958173 |
| 18  | N      | -3.68157 | 0.599677 | -0.40844 | 54  | H      | -3.81551 | -2.56721 | 2.049417 |
| 19  | C      | -5.08028 | 0.703735 | -0.4532  | 55  | H      | -4.60499 | -1.02723 | 2.456181 |
| 20  | C      | -5.6477  | -0.50174 | -0.03642 | 56  | H      | -2.34131 | 2.195367 | -0.06493 |
| 21  | C      | -4.54636 | -1.46379 | 0.31966  | 57  | H      | -2.03166 | 1.218725 | -1.52803 |
| 22  | C      | -5.86089 | 1.791619 | -0.83324 | 58  | H      | -3.38903 | 2.347544 | -1.48944 |
| 23  | C      | -7.25114 | 1.629027 | -0.79524 | 59  | H      | 1.079273 | 2.358014 | 2.487824 |
| 24  | C      | -7.83218 | 0.424902 | -0.38883 | 60  | H      | -0.25427 | 2.301838 | 1.309238 |
| 25  | C      | -7.02371 | -0.65443 | -0.0035  | 61  | H      | 0.126496 | 0.875    | 2.29689  |
| 26  | C      | -4.56548 | -2.69403 | -0.60041 | 62  | H      | 5.760686 | 0.500961 | -1.01005 |
| 27  | C      | -4.63888 | -1.89456 | 1.789664 | 63  | H      | 6.68232  | -0.71538 | 0.654076 |
| 28  | C      | -2.80806 | 1.64766  | -0.89022 | 64  | H      | 5.236243 | -1.69269 | 0.827456 |
| 29  | C      | 0.551762 | 1.726164 | 1.770483 | 65  | H      | 5.738533 | -2.83663 | -1.35674 |
| 30  | N      | 5.141662 | -0.22015 | -0.66694 | 66  | H      | 7.156705 | -1.79059 | -1.56931 |
| 31  | C      | 5.88638  | -1.22035 | 0.091256 | 67  | H      | 7.756657 | -3.92844 | -0.68841 |
| 32  | C      | 6.500564 | -2.25841 | -0.83214 | 68  | H      | 8.077526 | -2.73439 | 0.448396 |
| 33  | N      | 7.325049 | -3.21549 | -0.05058 | 69  | H      | 6.759056 | -3.70529 | 0.646593 |
| 34  | H      | 5.145625 | 4.690183 | -0.88296 | 70  | O      | 8.382654 | -5.04648 | -1.82473 |
| 35  | H      | 2.984942 | 5.493539 | 0.079392 | 71  | H      | 9.319628 | -4.88074 | -1.99391 |
| 36  | H      | 1.303955 | 3.892485 | 0.850505 | 72  | H      | 7.950644 | -4.91792 | -2.67977 |

**Table S28.** Calculated atomic coordinates for probe **D** with one added water molecule.

| Row | Symbol | X        | Y        | Z        | Row | Symbol | X        | Y        | Z        |
|-----|--------|----------|----------|----------|-----|--------|----------|----------|----------|
| 1   | C      | -4.10989 | 0.166512 | 3.304272 | 43  | C      | -0.05148 | 6.579578 | 2.130322 |
| 2   | C      | -4.64733 | -1.11648 | 3.11375  | 44  | C      | 0.333798 | 7.070993 | 0.908806 |
| 3   | C      | -3.83324 | -2.17514 | 2.756394 | 45  | C      | 1.619472 | 6.758485 | 0.355282 |
| 4   | C      | -2.44589 | -1.98036 | 2.595214 | 46  | C      | 2.483384 | 5.926223 | 1.112611 |
| 5   | C      | -1.88291 | -0.70948 | 2.865042 | 47  | C      | 1.12904  | 9.504916 | -1.42773 |
| 6   | C      | -2.74885 | 0.361708 | 3.179644 | 48  | C      | 1.091756 | 8.007161 | -1.70549 |
| 7   | N      | -1.63859 | -3.01422 | 2.154051 | 49  | N      | 1.997378 | 7.245836 | -0.84955 |
| 8   | C      | -0.35748 | -2.76607 | 1.722418 | 50  | C      | 3.34115  | 7.038956 | -1.38057 |
| 9   | C      | 0.259901 | -1.5412  | 2.033724 | 51  | C      | 3.473929 | 5.746581 | -2.1774  |
| 10  | C      | -0.45542 | -0.558   | 2.738835 | 52  | H      | -4.76021 | 1.004895 | 3.536058 |
| 11  | C      | 0.379492 | -3.77422 | 0.977895 | 53  | H      | -5.71699 | -1.27961 | 3.213676 |
| 12  | C      | 1.875662 | -3.71426 | 1.12184  | 54  | H      | -4.27849 | -3.14295 | 2.559428 |
| 13  | C      | 2.336136 | -2.30482 | 0.757282 | 55  | H      | -2.34809 | 1.361998 | 3.290769 |
| 14  | C      | 1.714992 | -1.29074 | 1.711277 | 56  | H      | 2.168734 | -3.93884 | 2.157426 |
| 15  | C      | -0.2701  | -4.56514 | 0.064407 | 57  | H      | 2.362453 | -4.45438 | 0.483613 |
| 16  | C      | 0.32908  | -5.54858 | -0.77055 | 58  | H      | 3.427813 | -2.22128 | 0.799449 |
| 17  | C      | -0.24944 | -6.34633 | -1.72859 | 59  | H      | 2.03217  | -2.08803 | -0.27436 |
| 18  | N      | -1.5303  | -6.3535  | -2.21046 | 60  | H      | 2.276207 | -1.30267 | 2.659331 |
| 19  | C      | -1.70795 | -7.38146 | -3.1456  | 61  | H      | 1.836205 | -0.28169 | 1.294622 |
| 20  | C      | -0.49931 | -8.05708 | -3.32981 | 62  | H      | -1.33684 | -4.41194 | -0.03267 |
| 21  | C      | 0.548119 | -7.43861 | -2.44272 | 63  | H      | 1.386998 | -5.74537 | -0.62449 |
| 22  | C      | -2.86329 | -7.74828 | -3.83094 | 64  | H      | -3.81006 | -7.23906 | -3.68039 |
| 23  | C      | -2.768   | -8.81875 | -4.72888 | 65  | H      | -3.65546 | -9.12577 | -5.27679 |
| 24  | C      | -1.56272 | -9.49641 | -4.92903 | 66  | H      | -1.51661 | -10.3246 | -5.63118 |
| 25  | C      | -0.41397 | -9.11378 | -4.22046 | 67  | H      | 0.528118 | -9.63732 | -4.36637 |
| 26  | C      | 1.687535 | -6.83    | -3.27363 | 68  | H      | 2.190301 | -7.61929 | -3.8423  |
| 27  | C      | 1.105132 | -8.46406 | -1.44627 | 69  | H      | 1.305625 | -6.08446 | -3.97801 |
| 28  | C      | -2.58014 | -5.42205 | -1.86381 | 70  | H      | 2.426422 | -6.35054 | -2.62357 |
| 29  | C      | -2.14854 | -4.38016 | 2.323947 | 71  | H      | 1.596875 | -9.27713 | -1.99046 |
| 30  | N      | 0.192164 | 0.53625  | 3.198545 | 72  | H      | 1.842574 | -8.00056 | -0.78329 |
| 31  | C      | -0.13761 | 1.332849 | 4.371778 | 73  | H      | 0.305169 | -8.89124 | -0.8336  |
| 32  | C      | 1.12078  | 1.461083 | 5.233087 | 74  | H      | -2.98123 | -5.62186 | -0.8644  |
| 33  | N      | 0.975702 | 2.448991 | 6.284997 | 75  | H      | -2.20182 | -4.39813 | -1.90679 |
| 34  | C      | 0.947065 | 3.785488 | 6.118181 | 76  | H      | -3.39056 | -5.51042 | -2.58622 |
| 35  | O      | 0.563868 | 4.549545 | 7.025147 | 77  | H      | -2.63079 | -4.44685 | 3.30078  |
| 36  | C      | 1.350243 | 4.349708 | 4.798491 | 78  | H      | -2.86682 | -4.65334 | 1.547133 |
| 37  | C      | 0.479246 | 5.188952 | 4.14121  | 79  | H      | -1.31321 | -5.07515 | 2.299097 |
| 38  | C      | 0.802535 | 5.749112 | 2.892651 | 80  | H      | 1.171126 | 0.585402 | 2.946416 |
| 39  | C      | 2.06644  | 5.452883 | 2.336499 | 81  | H      | -0.48677 | 2.330902 | 4.082655 |
| 40  | O      | 2.945007 | 4.653647 | 3.023437 | 82  | H      | -0.93007 | 0.844835 | 4.94246  |
| 41  | C      | 2.645212 | 4.08799  | 4.240729 | 83  | H      | 1.352307 | 0.50439  | 5.706509 |
| 42  | O      | 3.541592 | 3.40625  | 4.747921 | 84  | H      | 1.975811 | 1.719926 | 4.607528 |

| Row | Symbol | X        | Y        | Z        | Row | Symbol | X        | Y        | Z        |
|-----|--------|----------|----------|----------|-----|--------|----------|----------|----------|
| 85  | H      | 0.63873  | 2.127869 | 7.185806 | 94  | H      | 0.076943 | 7.61352  | -1.60294 |
| 86  | H      | -0.49055 | 5.405803 | 4.584375 | 95  | H      | 3.567683 | 7.900267 | -2.0165  |
| 87  | H      | -1.02849 | 6.832396 | 2.534476 | 96  | H      | 4.063077 | 7.070112 | -0.55944 |
| 88  | H      | -0.34563 | 7.719804 | 0.369386 | 97  | H      | 4.490648 | 5.65077  | -2.57314 |
| 89  | H      | 3.459938 | 5.630317 | 0.750074 | 98  | H      | 3.266019 | 4.870893 | -1.55415 |
| 90  | H      | 0.45955  | 10.03271 | -2.11539 | 99  | H      | 2.777747 | 5.738003 | -3.02298 |
| 91  | H      | 0.812324 | 9.727037 | -0.40347 | 100 | O      | 4.195736 | 1.298685 | 2.940797 |
| 92  | H      | 2.140482 | 9.901683 | -1.56658 | 101 | H      | 3.539989 | 0.633764 | 3.184936 |
| 93  | H      | 1.390582 | 7.806608 | -2.73913 | 102 | H      | 4.045566 | 2.031456 | 3.565146 |

**Table S29.** Calculated atomic coordinates for probe  $\text{DH}^+$  with one added water molecule.

| Row | Symbol | X        | Y        | Z        | Row | Symbol | X        | Y        | Z        |
|-----|--------|----------|----------|----------|-----|--------|----------|----------|----------|
| 1   | C      | 5.853032 | 0.972263 | 0.365785 | 31  | C      | 4.761133 | -0.66016 | 5.015921 |
| 2   | C      | 4.823409 | 1.173409 | -0.56219 | 32  | C      | 4.767737 | 0.83146  | 4.700814 |
| 3   | C      | 3.606998 | 0.526949 | -0.41948 | 33  | N      | 4.253665 | 1.570989 | 5.834983 |
| 4   | C      | 3.392507 | -0.34946 | 0.660954 | 34  | C      | 2.945004 | 1.726094 | 6.114126 |
| 5   | C      | 4.426691 | -0.555   | 1.605244 | 35  | O      | 2.547489 | 2.132168 | 7.219559 |
| 6   | C      | 5.65247  | 0.117385 | 1.434174 | 36  | C      | 1.958996 | 1.39865  | 5.039394 |
| 7   | N      | 2.177151 | -1.00357 | 0.808409 | 37  | C      | 1.101766 | 0.338036 | 5.172432 |
| 8   | C      | 2.004811 | -2.03153 | 1.714662 | 38  | C      | 0.108613 | 0.07995  | 4.203228 |
| 9   | C      | 2.94273  | -2.08456 | 2.822407 | 39  | C      | -0.03061 | 0.988429 | 3.132684 |
| 10  | C      | 4.110293 | -1.39103 | 2.724192 | 40  | O      | 0.843587 | 2.040346 | 3.003283 |
| 11  | C      | 0.975433 | -2.99575 | 1.60393  | 41  | C      | 1.864247 | 2.271917 | 3.900384 |
| 12  | C      | 0.680678 | -3.92005 | 2.765779 | 42  | O      | 2.604117 | 3.221914 | 3.653091 |
| 13  | C      | 1.912962 | -4.20871 | 3.608314 | 43  | C      | -0.77891 | -1.01673 | 4.228085 |
| 14  | C      | 2.560299 | -2.89936 | 4.025134 | 44  | C      | -1.72714 | -1.19294 | 3.25039  |
| 15  | C      | 0.279497 | -3.18326 | 0.396233 | 45  | C      | -1.87617 | -0.24652 | 2.188113 |
| 16  | C      | -0.82106 | -4.02289 | 0.244219 | 46  | C      | -1.00985 | 0.874187 | 2.171021 |
| 17  | C      | -1.55356 | -4.32288 | -0.90738 | 47  | C      | -4.84159 | -1.75301 | 1.815501 |
| 18  | N      | -1.50072 | -3.76076 | -2.12744 | 48  | C      | -3.52249 | -1.68712 | 1.056142 |
| 19  | C      | -2.37609 | -4.41037 | -3.02128 | 49  | N      | -2.81171 | -0.42386 | 1.222077 |
| 20  | C      | -3.05761 | -5.41643 | -2.33862 | 50  | C      | -3.15408 | 0.62643  | 0.269976 |
| 21  | C      | -2.59816 | -5.43153 | -0.90804 | 51  | C      | -2.36004 | 0.564718 | -1.02927 |
| 22  | C      | -2.58164 | -4.1559  | -4.37241 | 52  | H      | 6.805407 | 1.480727 | 0.250279 |
| 23  | C      | -3.52343 | -4.95282 | -5.0324  | 53  | H      | 4.975875 | 1.834098 | -1.41097 |
| 24  | C      | -4.22238 | -5.96007 | -4.35986 | 54  | H      | 2.839211 | 0.682251 | -1.16722 |
| 25  | C      | -3.99124 | -6.19879 | -2.99863 | 55  | H      | 6.466469 | -0.0111  | 2.140974 |
| 26  | C      | -1.96048 | -6.77728 | -0.53324 | 56  | H      | -0.10468 | -3.48953 | 3.400168 |
| 27  | C      | -3.75996 | -5.10162 | 0.04382  | 57  | H      | 0.28572  | -4.86376 | 2.380416 |
| 28  | C      | -0.71482 | -2.60641 | -2.51079 | 58  | H      | 1.636916 | -4.78712 | 4.496125 |
| 29  | C      | 1.049609 | -0.4242  | 0.072984 | 59  | H      | 2.632332 | -4.80865 | 3.035688 |
| 30  | N      | 5.086204 | -1.48509 | 3.806459 | 60  | H      | 1.839233 | -2.31107 | 4.60849  |



| Row | Symbol | X        | Y        | Z        | Row | Symbol | X        | Y        | Z        |
|-----|--------|----------|----------|----------|-----|--------|----------|----------|----------|
| 61  | H      | 3.409533 | -3.08805 | 4.681831 | 83  | H      | 5.504893 | -0.91314 | 5.774664 |
| 62  | H      | 0.675588 | -2.69544 | -0.48312 | 84  | H      | 5.780183 | 1.181196 | 4.486737 |
| 63  | H      | -1.18162 | -4.54811 | 1.122824 | 85  | H      | 4.154888 | 1.048208 | 3.824311 |
| 64  | H      | -2.03912 | -3.38173 | -4.90562 | 86  | H      | 4.889673 | 1.756921 | 6.603435 |
| 65  | H      | -3.7091  | -4.78325 | -6.08973 | 87  | H      | 1.185698 | -0.32149 | 6.033878 |
| 66  | H      | -4.94732 | -6.56424 | -4.89868 | 88  | H      | -0.70037 | -1.73128 | 5.043532 |
| 67  | H      | -4.52933 | -6.98246 | -2.47124 | 89  | H      | -2.38549 | -2.05167 | 3.306475 |
| 68  | H      | -2.70769 | -7.57092 | -0.63081 | 90  | H      | -1.03688 | 1.604261 | 1.371188 |
| 69  | H      | -1.11712 | -7.00983 | -1.19041 | 91  | H      | -4.68599 | -1.65429 | 2.894684 |
| 70  | H      | -1.60536 | -6.76216 | 0.501585 | 92  | H      | -5.5201  | -0.9554  | 1.494423 |
| 71  | H      | -4.50768 | -5.89821 | -0.02105 | 93  | H      | -5.33487 | -2.71289 | 1.627803 |
| 72  | H      | -3.41435 | -5.03751 | 1.079757 | 94  | H      | -2.86126 | -2.50695 | 1.345796 |
| 73  | H      | -4.23609 | -4.15673 | -0.22986 | 95  | H      | -3.70065 | -1.80985 | -0.01725 |
| 74  | H      | -0.76797 | -1.85936 | -1.71953 | 96  | H      | -4.22351 | 0.523729 | 0.056352 |
| 75  | H      | 0.327036 | -2.88301 | -2.69567 | 97  | H      | -3.03351 | 1.598724 | 0.756217 |
| 76  | H      | -1.1352  | -2.17458 | -3.41746 | 98  | H      | -1.28856 | 0.697789 | -0.85326 |
| 77  | H      | 1.094488 | 0.660068 | 0.185492 | 99  | H      | -2.51208 | -0.39363 | -1.53557 |
| 78  | H      | 1.077119 | -0.67714 | -0.98891 | 100 | H      | -2.69366 | 1.3587   | -1.70634 |
| 79  | H      | 0.124652 | -0.78186 | 0.512334 | 101 | O      | 5.686482 | -4.10174 | 4.299784 |
| 80  | H      | 5.223861 | -2.50036 | 4.079495 | 102 | H      | 4.986505 | -4.69154 | 3.986118 |
| 81  | H      | 6.012013 | -1.20874 | 3.466643 | 103 | H      | 5.766132 | -4.29225 | 5.244209 |
| 82  | H      | 3.776384 | -0.971   | 5.36649  |     |        |          |          |          |

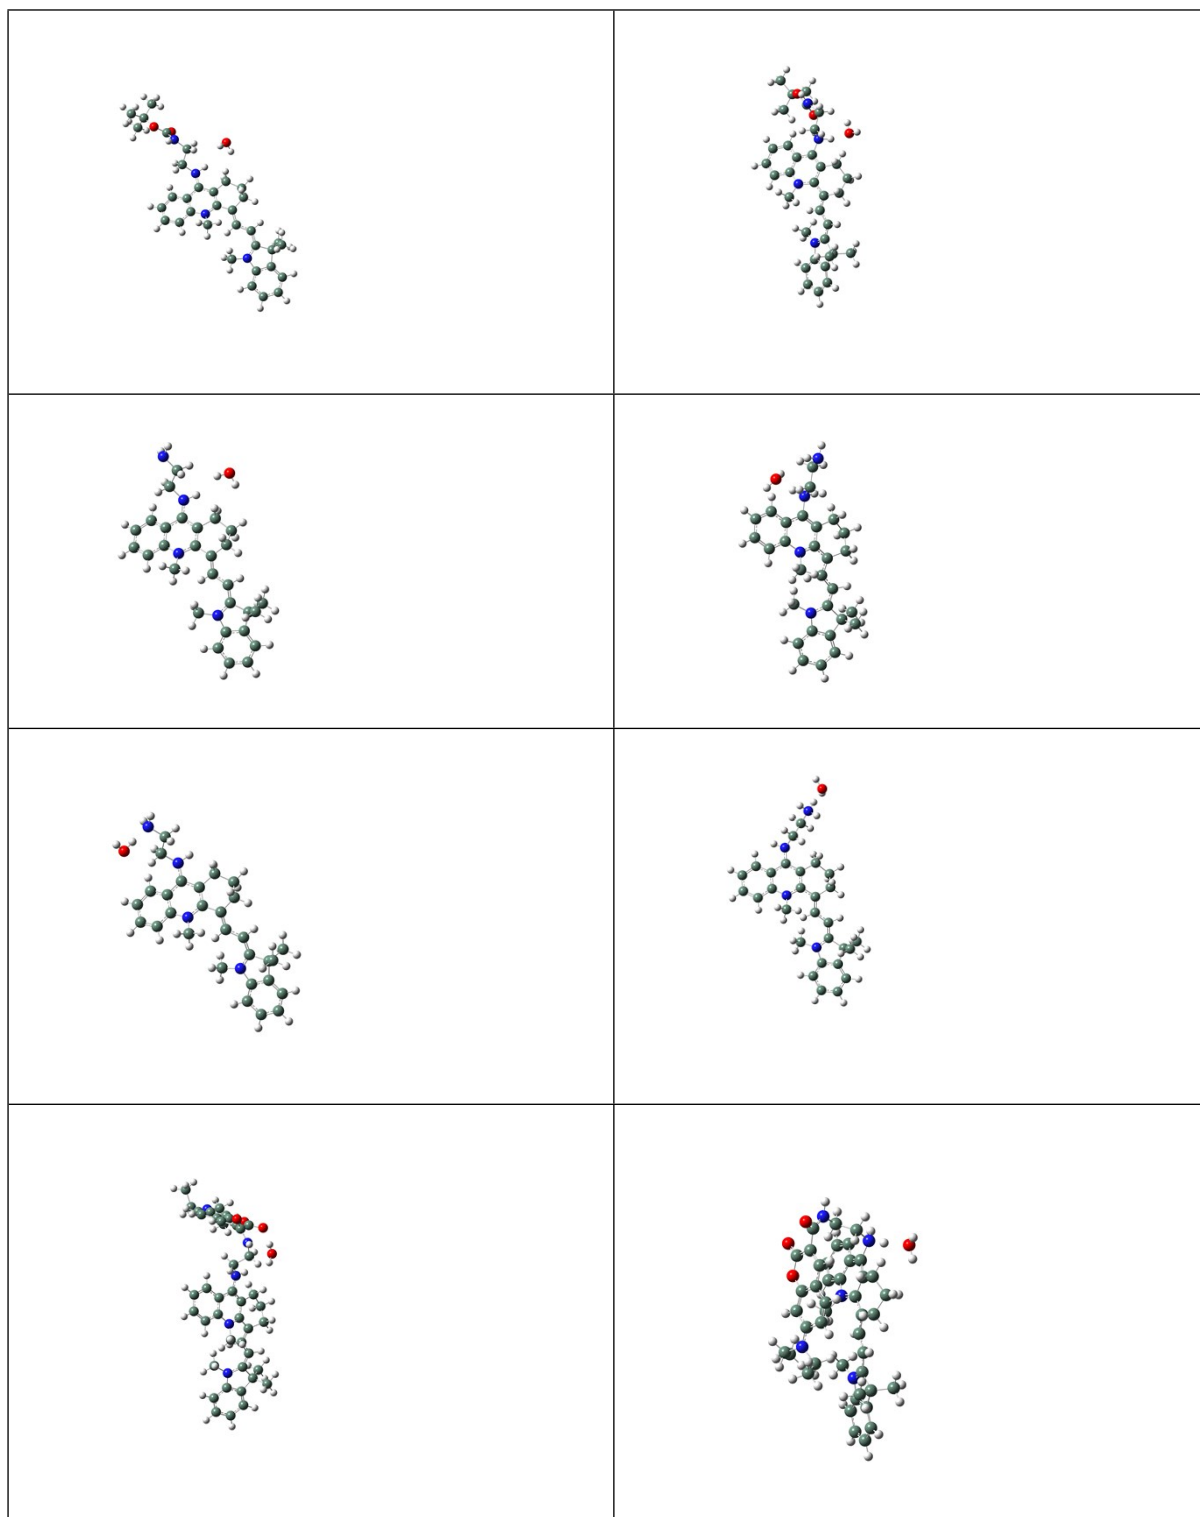

**Figure S54.** Drawings of the probes showing the orientation of the added water molecule. **B**, **C** (water in middle), **C** (water at the end) and **D** from top to bottom on the left side and on the right are the corresponding protonated probes.

## References

1. ChemBio3D, *Journal*, 2012.
2. M. D. Hanwell, D. E. Curtis, D. C. Lonie, T. Vandermeersch, E. Zurek and G. R. Hutchison, *Journal of Cheminformatics*, 2012, **4**, 17.
3. M. J. Frisch, G. W. Trucks, H. B. Schlegel, G. E. Scuseria, M. A. Robb, J. R. Cheeseman, G. Scalmani, V. Barone, G. A. Petersson, H. Nakatsuji, X. Li, M. Caricato, A. V. Marenich, J. Bloino, B. G. Janesko, R. Gomperts, B. Mennucci, H. P. Hratchian, J. V. Ortiz, A. F. Izmaylov, J. L. Sonnenberg, D. Williams-Young, F. Ding, F. Lipparini, F. Egidi, J. Goings, B. Peng, A. Petrone, T. Henderson, D. Ranasinghe, V. G. Zakrzewski, J. Gao, N. Rega, G. Zheng, W. Liang, M. Hada, M. Ehara, K. Toyota, R. Fukuda, J. Hasegawa, M. Ishida, T. Nakajima, Y. Honda, O. Kitao, H. Nakai, T. Vreven, K. Throssell, J. A. Montgomery, Jr, J. E. Peralta, F. Ogliaro, M. J. Bearpark, J. J. Heyd, E. N. Brothers, K. N. Kudin, V. N. Staroverov, T. A. Keith, R. Kobayashi, J. Normand, K. Raghavachari, A. P. Rendell, J. C. Burant, S. S. Iyengar, J. Tomasi, M. Cossi, J. M. Millam, M. Klene, C. Adamo, R. Cammi, J. W. Ochterski, R. L. Martin, K. Morokuma, O. Farkas, J. B. Foresman and D. J. Fox, Gaussian 16, Revision A.03, Wallingford CT: Gaussian, Inc., 2016.
4. A. Austin, G. A. Petersson, M. J. Frisch, F. J. Dobek, G. Scalmani and K. Throssell, *Journal of Chemical Theory and Computation*, 2012, **8**, 4989-5007.
5. G. Scalmani and M. J. Frisch, *The Journal of Chemical Physics*, 2010, **132**, 114110.
6. GaussView, V. 6, R. Dennington, T. A. Keith and J. M. Millam, Semichem Inc. Shawnee Mission, KS, 2016.
7. A. V. Marenich, C. J. Cramer and D. G. Truhlar, *The Journal of Physical Chemistry B*, 2009, **113**, 6378-6396.
8. B. Thapa and H. B. Schlegel, *The Journal of Physical Chemistry A*, 2017, **121**, 4698-4706.
